# Supplementary material for: Isatin as a 2-aminobenzaldehyde surrogate: transition metal-free efficient synthesis of 2-(2′-aminophenyl)benzothiazole derivatives
Source: Royal Society of Chemistry journal article supplement (doi:10.1039/d0ob00888e), 2020-01-01
Supplement: d0ob00888e1.pdf [file d0ob00888e1.pdf]

# Isatin as 2-Aminobenzaldehyde Surrogate: Transition Metal-free Efficient Synthesis of 2-(2'-Aminophenyl)benzothiazole Derivatives

Manpreet Singh,<sup>a</sup> Vaishali,<sup>a</sup> Avijit Kumar Paul<sup>b</sup> and Virender Singh<sup>ac\*</sup>

<sup>a</sup>Department of Chemistry, Dr B R Ambedkar National Institute of Technology (NIT) Jalandhar, 144011, Punjab, India.

<sup>b</sup>Department of Chemistry, National Institute of Technology (NIT) Kurukshetra, 136119, Haryana, India

<sup>c</sup>Department of Chemistry, Central University of Punjab, Bathinda, 151001, Punjab, India

E mail:- singhv@nitj.ac.in, virender.singh@cup.edu.in; (+) 91-9780998060

## Supporting Information

### Table of Contents

|           |                                                                         |              |
|-----------|-------------------------------------------------------------------------|--------------|
| <b>1.</b> | <b>X-ray Crystallographic Data of 1E</b>                                | <b>2</b>     |
| <b>2.</b> | <b>Photophysical studies of synthesised compounds</b>                   | <b>3-10</b>  |
| <b>3.</b> | <b>Experimental data</b>                                                | <b>11-19</b> |
| <b>4.</b> | <b><sup>1</sup>H-NMR and <sup>13</sup>C-NMR spectra of new products</b> | <b>20-49</b> |

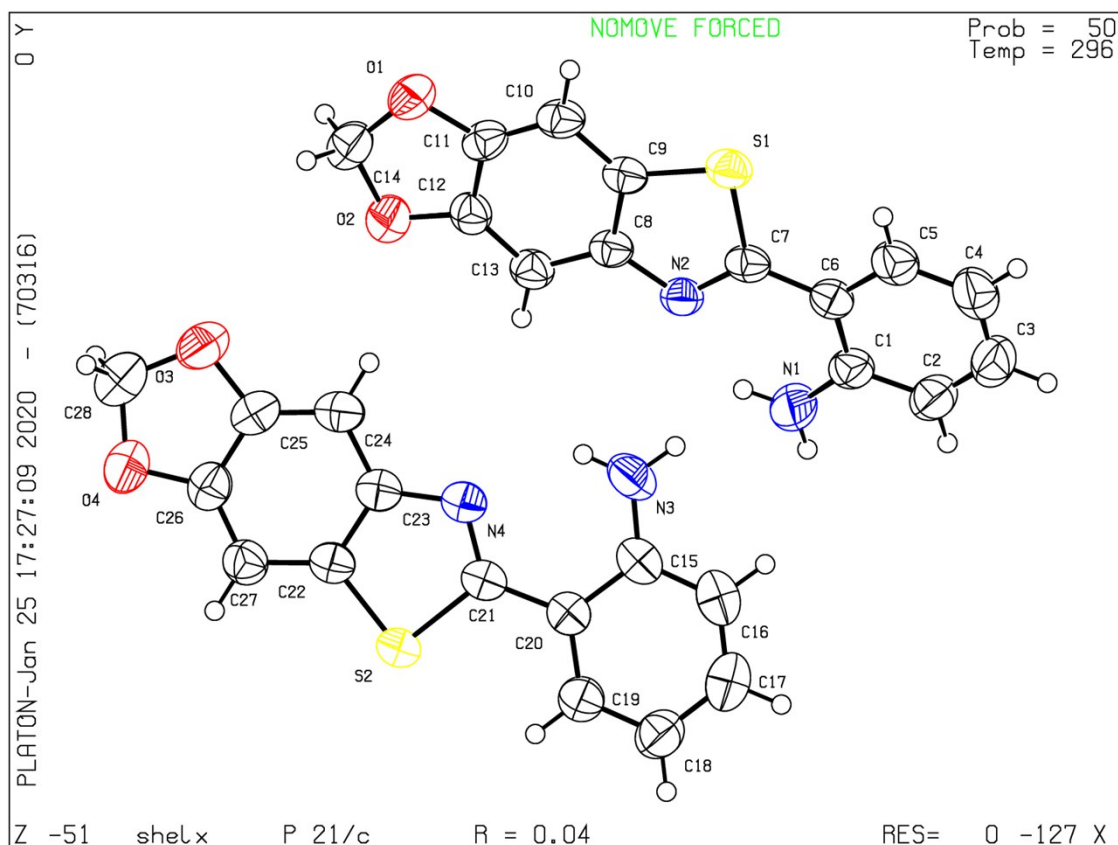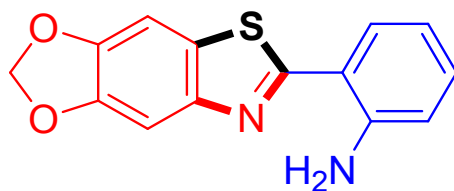

**Figure S1. X-ray crystallographic analysis of 1E (CCDC 1980927)**

Recrystallized from DCM/THF/MeOH (V/V/V = 1/1/1). Further information can be found in the CIF file. This crystal was deposited in the Cambridge Crystallographic Data Centre and assigned as CCDC 1980927

## Photophysical Studies

The fluorescent quantum yields ( $\Phi$ ) were measured relative to quinine sulfate ( $\Phi_R = 0.546$  in 0.1 M  $H_2SO_4$  at 350 nm excitation) as a reference compound. For the measurement of UV-Vis absorption and fluorescence emission of samples, stock solutions of 1.0 mM concentration were prepared and diluted to 5.0  $\mu M$  concentration using  $CHCl_3$  as a solvent. These  $\Phi_s$  was calculated as per this equation:

$$\Phi_S = \Phi_R \times \frac{I_S}{I_R} \times \frac{A_R}{A_S} \times \frac{\eta_S^2}{\eta_R^2}$$

$R$  – Reference;  $S$  – Sample

Where  $\Phi_s$  is the quantum yield of sample,  $\Phi_R$  is the quantum yield of quinine sulfate  $\eta$  is the refractive index,  $I$  is the integrated fluorescence intensity and  $A$  is the absorbance.

**Figure S2. Photophysical properties and graphical data of 2-(2'-aminophenyl)benzothiazole derivatives**

| 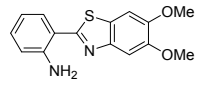<br><b>1A</b> | UV-Vis              | Fluorescence        |           | $\Phi_F$ |
|--------------------------------------------------------------------------------------------------|---------------------|---------------------|-----------|----------|
|                                                                                                  | $\lambda_{Ex}$ (nm) | $\lambda_{Em}$ (nm) | Intensity |          |
|                                                                                                  | 265                 | 421                 | 14.67     | 0.07     |
| 374                                                                                              | 425                 | 32.06               | 0.04      |          |

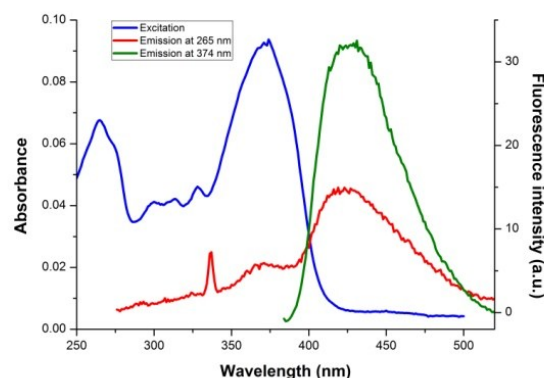

| 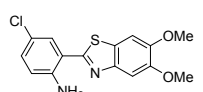<br><b>2A</b> | UV-Vis              | Fluorescence        |           | $\Phi_F$ |
|--------------------------------------------------------------------------------------------------|---------------------|---------------------|-----------|----------|
|                                                                                                  | $\lambda_{Ex}$ (nm) | $\lambda_{Em}$ (nm) | Intensity |          |
|                                                                                                  | 267                 | 439                 | 38.03     | 0.14     |
| 379                                                                                              | 441                 | 68.09               | 0.15      |          |

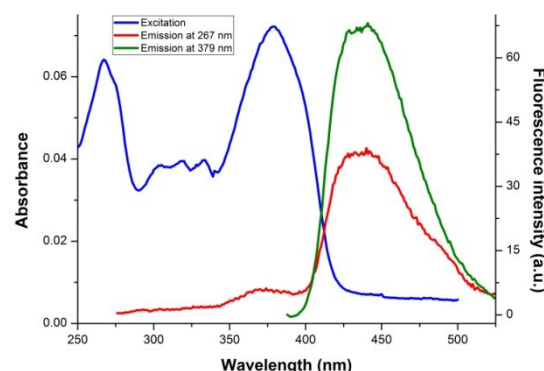

| 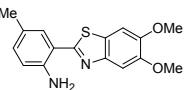 <p><b>4A</b></p> | UV-Vis              |                     | Fluorescence |  | $\Phi_F$ |
|----------------------------------------------------------------------------------------------------|---------------------|---------------------|--------------|--|----------|
|                                                                                                    | $\lambda_{Ex}$ (nm) | $\lambda_{Em}$ (nm) | Intensity    |  |          |
|                                                                                                    | 265                 | 435                 | 26.93        |  | 0.11     |
|                                                                                                    | 314                 | 445                 | 28.32        |  | 0.09     |
|                                                                                                    | 377                 | 439                 | 59.93        |  | 0.20     |

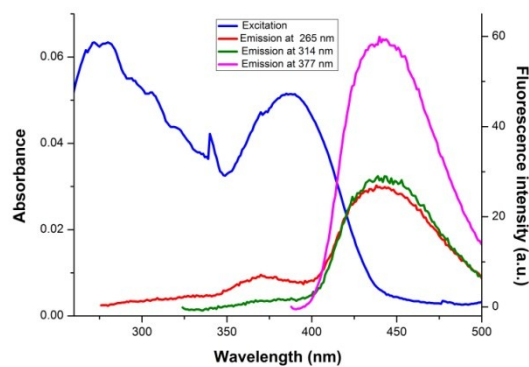

| 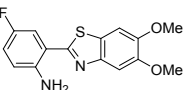 <p><b>1D</b></p> | UV-Vis              |                     | Fluorescence |  | $\Phi_F$ |
|----------------------------------------------------------------------------------------------------|---------------------|---------------------|--------------|--|----------|
|                                                                                                    | $\lambda_{Ex}$ (nm) | $\lambda_{Em}$ (nm) | Intensity    |  |          |
|                                                                                                    | 265                 | 437                 | 85.66        |  | 0.18     |
|                                                                                                    | 378                 | 440                 | 38.23        |  | 0.20     |

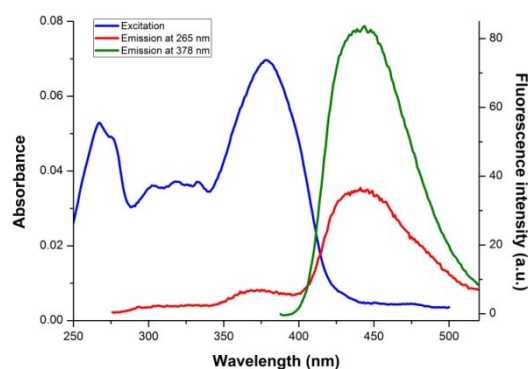

| 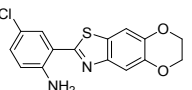 <p><b>2D</b></p> | UV-Vis              |                     | Fluorescence |  | $\Phi_F$ |
|------------------------------------------------------------------------------------------------------|---------------------|---------------------|--------------|--|----------|
|                                                                                                      | $\lambda_{Ex}$ (nm) | $\lambda_{Em}$ (nm) | Intensity    |  |          |
|                                                                                                      | 244                 | 437                 | 9.67         |  | 0.07     |
|                                                                                                      | 270                 | 439                 | 18.86        |  | 0.11     |
|                                                                                                      | 380                 | 440                 | 27.20        |  | 0.07     |

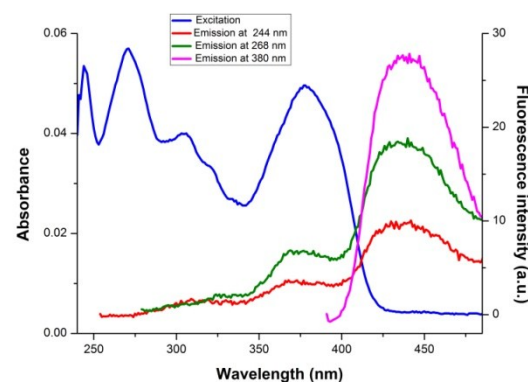

| 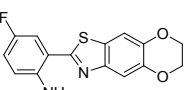 <p><b>3D</b></p> | UV-Vis              |                     | Fluorescence |  | $\Phi_F$ |
|------------------------------------------------------------------------------------------------------|---------------------|---------------------|--------------|--|----------|
|                                                                                                      | $\lambda_{Ex}$ (nm) | $\lambda_{Em}$ (nm) | Intensity    |  |          |
|                                                                                                      | 270                 | 437                 | 25.42        |  | 0.11     |
|                                                                                                      | 306                 | 438                 | 31.12        |  | 0.09     |
|                                                                                                      | 378                 | 439                 | 57.72        |  | 0.10     |

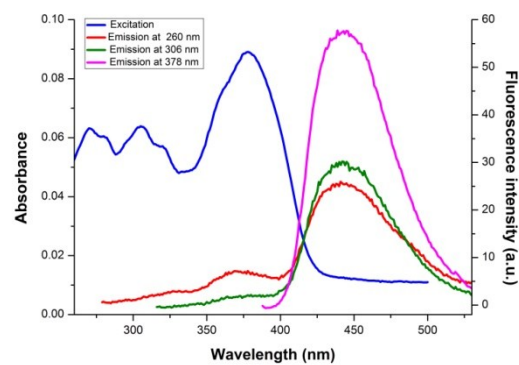

| 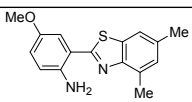 <p><b>5B</b></p> | UV-Vis              |                     | Fluorescence |  | $\Phi_F$ |
|----------------------------------------------------------------------------------------------------|---------------------|---------------------|--------------|--|----------|
|                                                                                                    | $\lambda_{Ex}$ (nm) | $\lambda_{Em}$ (nm) | Intensity    |  |          |
|                                                                                                    | 303                 | 468                 | 64.13        |  | 0.17     |
|                                                                                                    | 385                 | 470                 | 61.71        |  | 0.22     |

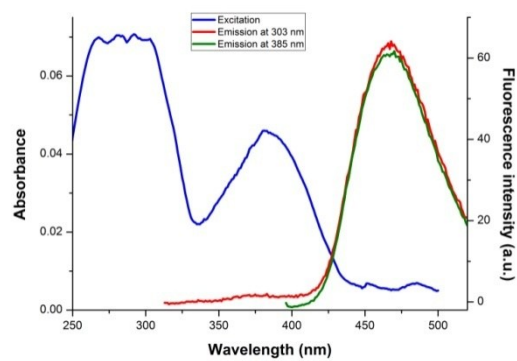

| 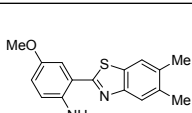 <p><b>5C</b></p> | UV-Vis              |                     | Fluorescence |  | $\Phi_F$ |
|----------------------------------------------------------------------------------------------------|---------------------|---------------------|--------------|--|----------|
|                                                                                                    | $\lambda_{Ex}$ (nm) | $\lambda_{Em}$ (nm) | Intensity    |  |          |
|                                                                                                    | 300                 | 469                 | 46.54        |  | 0.12     |
|                                                                                                    | 377                 | 471                 | 49.74        |  | 0.17     |

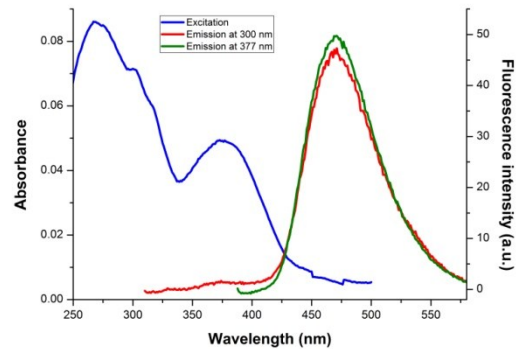

| 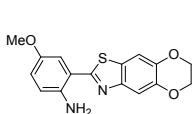 <p><b>5D</b></p> | UV-Vis              |                     | Fluorescence |  | $\Phi_F$ |
|-----------------------------------------------------------------------------------------------------|---------------------|---------------------|--------------|--|----------|
|                                                                                                     | $\lambda_{Ex}$ (nm) | $\lambda_{Em}$ (nm) | Intensity    |  |          |
|                                                                                                     | 245                 | 467                 | 39.56        |  | 0.19     |
|                                                                                                     | 336                 | 468                 | 71.44        |  | 0.29     |
|                                                                                                     | 390                 | 470                 | 136.59       |  | 0.44     |

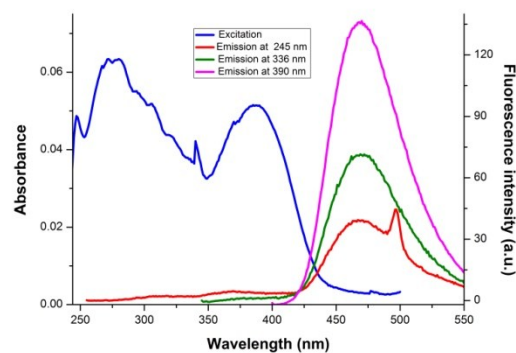

| 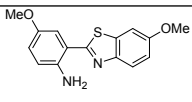 <p><b>5F</b></p> | UV-Vis              |                     | Fluorescence |  | $\Phi_F$ |
|------------------------------------------------------------------------------------------------------|---------------------|---------------------|--------------|--|----------|
|                                                                                                      | $\lambda_{Ex}$ (nm) | $\lambda_{Em}$ (nm) | Intensity    |  |          |
|                                                                                                      | 270                 | 466                 | 52.75        |  | 0.23     |
|                                                                                                      | 322                 | 466                 | 86.54        |  | 0.25     |

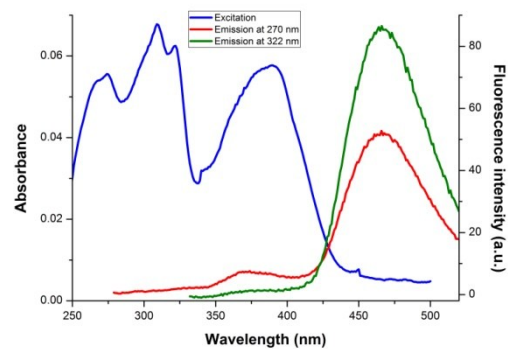

Figure S3. Photophysical properties and graphical data of 2-(6-ethyl-6H-thiazolo[4,5-c]carbazol-2-yl)aniline derivative

| 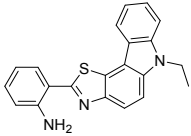<br><b>1J</b> | UV-Vis              |                     | Fluorescence |      | $\Phi_F$ |
|------------------------------------------------------------------------------------------------|---------------------|---------------------|--------------|------|----------|
|                                                                                                | $\lambda_{Ex}$ (nm) | $\lambda_{Em}$ (nm) | Intensity    |      |          |
|                                                                                                | 296                 | 432                 | 59.96        | 0.11 |          |
| 336                                                                                            | 431                 | 28.06               | 0.11         |      |          |
| 373                                                                                            | 432                 | 71.81               | 0.13         |      |          |

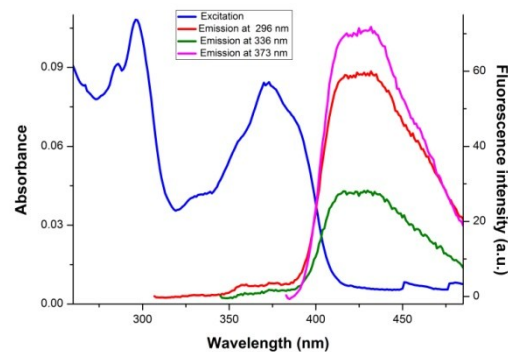

| 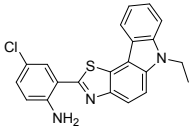<br><b>2J</b> | UV-Vis              |                     | Fluorescence |      | $\Phi_F$ |
|------------------------------------------------------------------------------------------------|---------------------|---------------------|--------------|------|----------|
|                                                                                                | $\lambda_{Ex}$ (nm) | $\lambda_{Em}$ (nm) | Intensity    |      |          |
|                                                                                                | 298                 | 444                 | 118.24       | 0.26 |          |
| 382                                                                                            | 444                 | 117.22              | 0.38         |      |          |

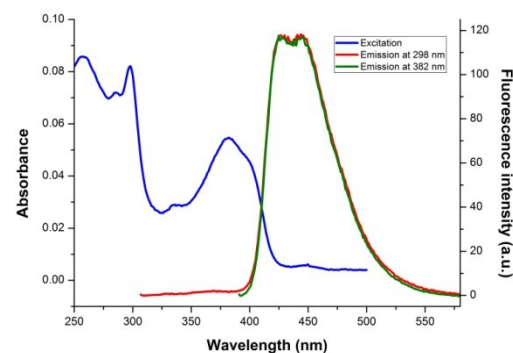

| 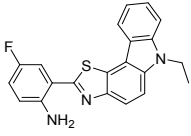<br><b>3J</b> | UV-Vis              |                     | Fluorescence |      | $\Phi_F$ |
|--------------------------------------------------------------------------------------------------|---------------------|---------------------|--------------|------|----------|
|                                                                                                  | $\lambda_{Ex}$ (nm) | $\lambda_{Em}$ (nm) | Intensity    |      |          |
|                                                                                                  | 298                 | 447                 | 244.69       | 0.24 |          |
| 336                                                                                              | 447                 | 101.13              | 0.24         |      |          |
| 382                                                                                              | 447                 | 259.17              | 0.36         |      |          |

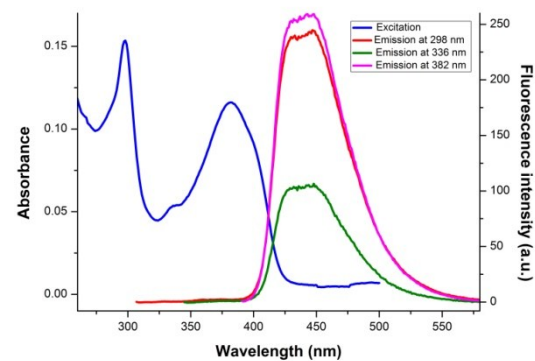

| 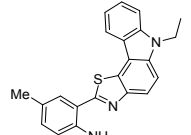<br><b>4J</b> | UV-Vis              |                     | Fluorescence |      | $\Phi_F$ |
|--------------------------------------------------------------------------------------------------|---------------------|---------------------|--------------|------|----------|
|                                                                                                  | $\lambda_{Ex}$ (nm) | $\lambda_{Em}$ (nm) | Intensity    |      |          |
|                                                                                                  | 297                 | 441                 | 140.20       | 0.15 |          |
| 334                                                                                              | 437                 | 65.23               | 0.18         |      |          |
| 377                                                                                              | 441                 | 156.67              | 0.21         |      |          |

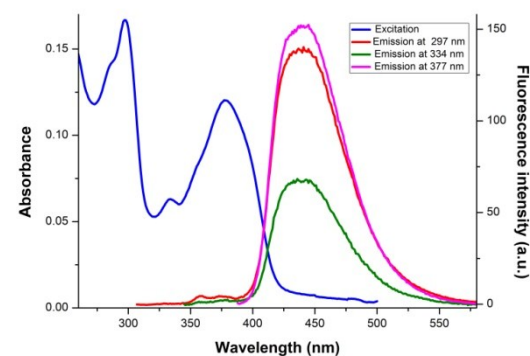

| 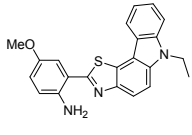<br><b>5J</b> | UV-Vis              | Fluorescence        |           | $\Phi_F$ |
|------------------------------------------------------------------------------------------------|---------------------|---------------------|-----------|----------|
|                                                                                                | $\lambda_{Ex}$ (nm) | $\lambda_{Em}$ (nm) | Intensity |          |
|                                                                                                | 267                 | 466                 | 411.42    | 0.45     |
|                                                                                                | 336                 | 466                 | 203.75    | 0.56     |
|                                                                                                | 392                 | 466                 | 380.52    | 0.60     |

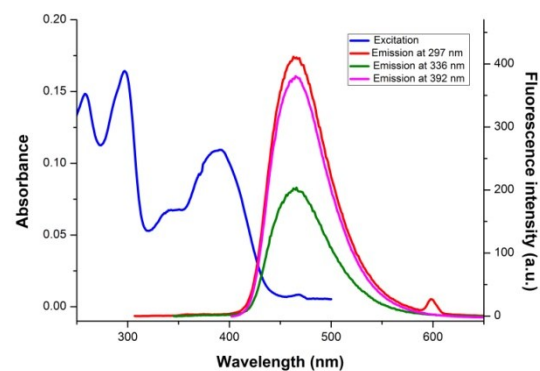

Figure S4. Photophysical properties and graphical data of 4-chloro-2-(naphtho[2,1-d]thiazol-2-yl)aniline derivative

| 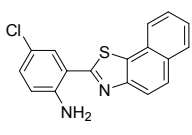<br><b>2K</b> | UV-Vis              | Fluorescence        |           | $\Phi_F$ |
|------------------------------------------------------------------------------------------------|---------------------|---------------------|-----------|----------|
|                                                                                                | $\lambda_{Ex}$ (nm) | $\lambda_{Em}$ (nm) | Intensity |          |
|                                                                                                | 279                 | 450                 | 92.47     | 0.15     |
|                                                                                                | 385                 | 449                 | 71.99     | 0.20     |

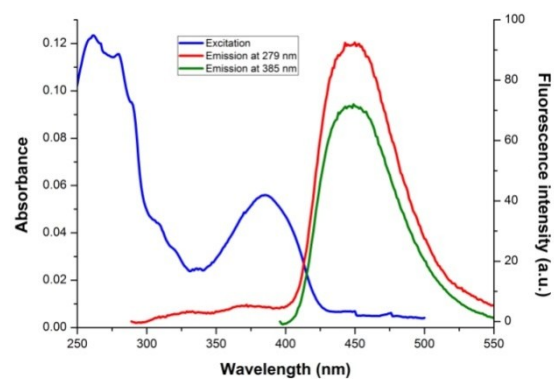

| 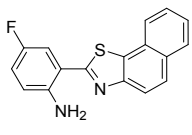<br><b>3K</b> | UV-Vis              | Fluorescence        |           | $\Phi_F$ |
|--------------------------------------------------------------------------------------------------|---------------------|---------------------|-----------|----------|
|                                                                                                  | $\lambda_{Ex}$ (nm) | $\lambda_{Em}$ (nm) | Intensity |          |
|                                                                                                  | 279                 | 455                 | 129.26    | 0.19     |
|                                                                                                  | 387                 | 453                 | 96.47     | 0.24     |

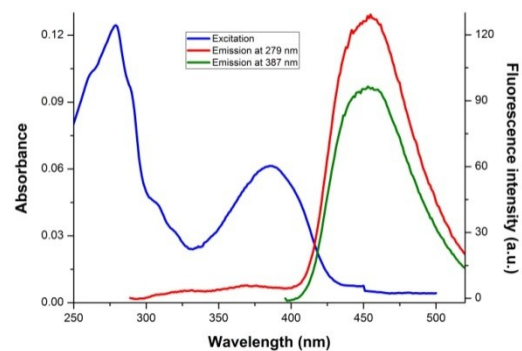

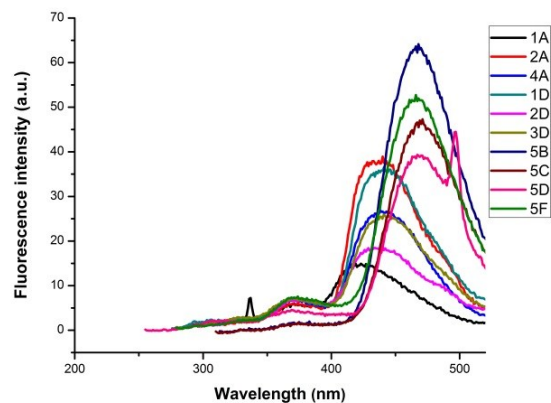

**Figure S5.** Fluorescence spectra of 2-(2'-aminophenyl)benzothiazoles derivatives excited ( $\lambda_{Ex}$ ) at 244–270 nm

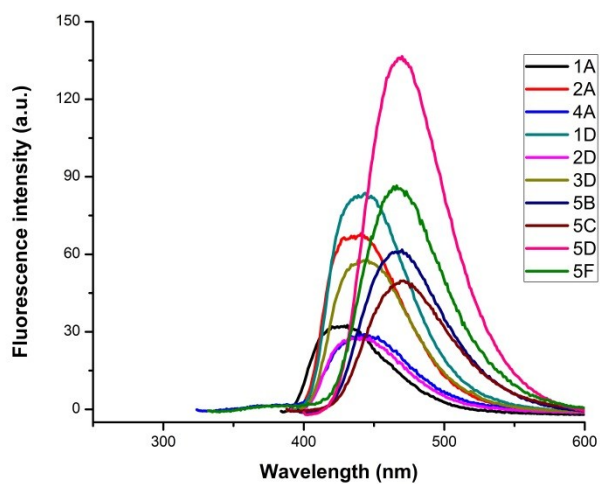

**Figure S6.** Fluorescence spectra of 2-(2'-aminophenyl) benzothiazoles derivatives excited ( $\lambda_{Ex}$ ) at 314–390 nm



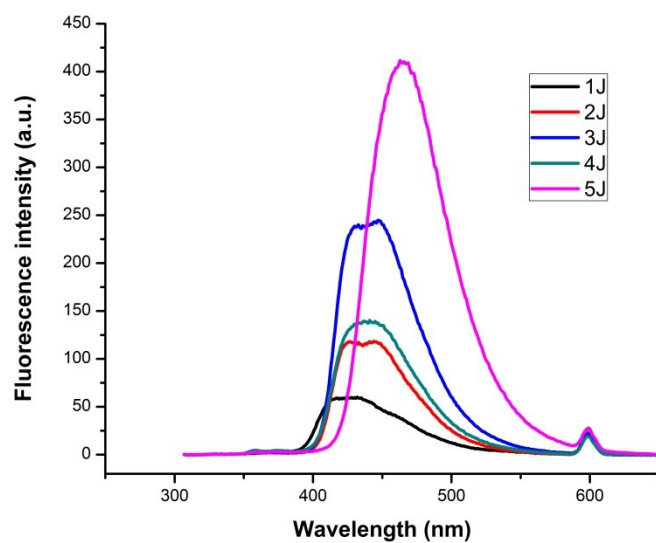

**Figure S7.** Fluorescence spectra of 2-(6-ethyl-6H-thiazolo[4,5-c]carbazol-2-yl) aniline derivatives excited ( $\lambda_{\text{EX}}$ ) at 267–298 nm

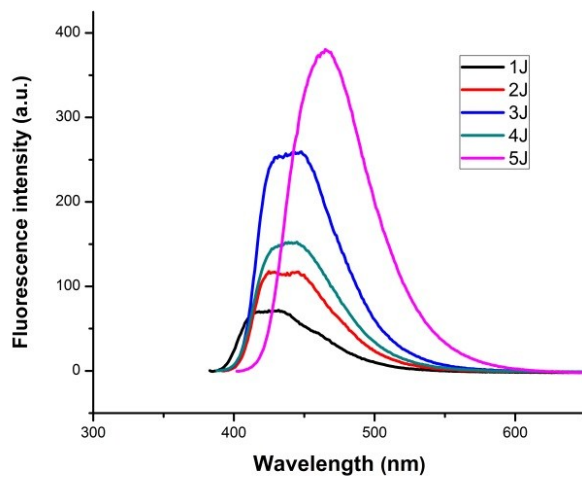

**Figure S8.** Fluorescence spectra of 2-(6-ethyl-6H-thiazolo[4,5-c]carbazol-2-yl) aniline derivatives excited ( $\lambda_{\text{EX}}$ ) at 336–392 nm

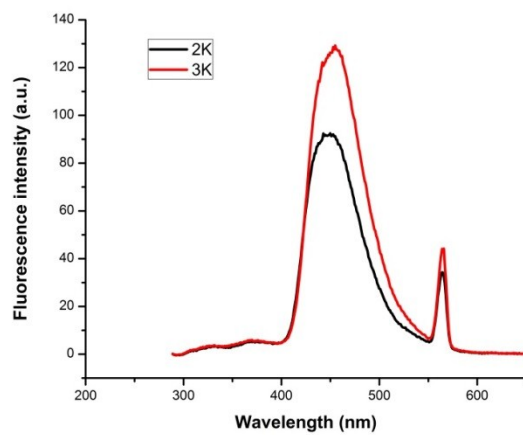

**Figure S9.** Fluorescence spectra of 2-(naphtho[2,1-*d*]thiazol-2-yl)anilines excited ( $\lambda_{\text{Ex}}$ ) at 279 nm

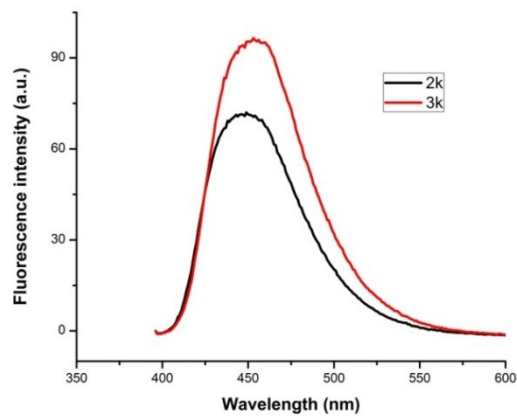

**Figure S10.** Fluorescence spectra of 2-(naphtho[2,1-*d*]thiazol-2-yl)anilines excited ( $\lambda_{\text{Ex}}$ ) at 385-387 nm

## Experimental data

**2-(5,6-Dimethoxybenzo[*d*]thiazol-2-yl)aniline (1A).** Yield: 80% (0.16 g from 0.10 g) as a yellow solid; m.p. 190-192 °C;  $R_f = 0.47$  (hexane/EtOAc, 70:30, v/v); IR (neat):  $\nu_{\max}$  (cm)<sup>-1</sup> = 3463 (NH), 3338 (NH), 1607 (C=N); <sup>1</sup>H NMR (500 MHz, CDCl<sub>3</sub>)  $\delta = 3.97$  (s, 3H, OCH<sub>3</sub>), 3.98 (s, 3H, OCH<sub>3</sub>), 6.31 (brs, 2H, NH<sub>2</sub>), 6.74 (t,  $J = 7.6$  Hz, 1H, ArH), 6.78 (d,  $J = 7.8$  Hz, 1H, ArH), 7.18–7.21 (m, 1H, ArH), 7.30 (s, 1H, ArH), 7.47 (s, 1H, ArH), 7.66 (dd,  $J_1 = 7.6$ ,  $J_2 = 1.1$  Hz, 1H, ArH) ppm; <sup>13</sup>C NMR (100 MHz, CDCl<sub>3</sub>)  $\delta = 56.2, 56.4, 102.3, 104.4, 115.8, 116.8, 117.0, 125.3, 129.9, 131.1, 146.3, 148.0, 148.4, 149.2, 167.7$  ppm; HRMS (ESI)  $m/z$ : calcd. for C<sub>15</sub>H<sub>14</sub>N<sub>2</sub>O<sub>2</sub>S [M + H<sup>+</sup>]: 287.0854, found: 287.0836.

**4-Chloro-2-(5,6-dimethoxybenzo[*d*]thiazol-2-yl)aniline (2A).** Yield: 74% (0.13 g from 0.10 g) as a brown solid; m.p. 178-180 °C;  $R_f = 0.46$  (hexane/EtOAc, 70:30, v/v); IR (neat):  $\nu_{\max}$  (cm)<sup>-1</sup> = 3452 (NH), 3325 (NH), 1611 (C=N); <sup>1</sup>H NMR (500 MHz, CDCl<sub>3</sub>)  $\delta = 3.98$  (s, 6H, (OCH<sub>3</sub>)<sub>2</sub>), 6.34 (brs, 2H, NH<sub>2</sub>), 6.72 (d,  $J = 8.7$  Hz, 1H, ArH), 7.13 (dd,  $J_1 = 8.6$ ,  $J_2 = 2.2$  Hz, 1H, ArH), 7.30 (s, 1H, ArH), 7.46 (s, 1H, ArH), 7.60 (d,  $J = 2.3$  Hz, 1H, ArH) ppm; <sup>13</sup>C NMR (100 MHz, CDCl<sub>3</sub>)  $\delta = 56.3, 56.5, 102.4, 104.6, 116.8, 118.1, 121.3, 125.5, 128.9, 130.8, 144.9, 148.0, 148.8, 149.5, 166.1$  ppm; HRMS (ESI)  $m/z$ : calcd. for C<sub>15</sub>H<sub>13</sub>ClN<sub>2</sub>O<sub>2</sub>S [M + H<sup>+</sup>]: 321.0465, [M + 2 + H<sup>+</sup>]: 323.0435 found: 321.0420 (100%), 323.0399 (33%).

**2-(5,6-Dimethoxybenzo[*d*]thiazol-2-yl)-4-fluoroaniline (3A).** Yield: 76% (0.14 g from 0.10 g) as a yellow solid; m.p. 180-182 °C;  $R_f = 0.43$  (hexane/EtOAc, 70:30, v/v); IR (neat):  $\nu_{\max}$  (cm)<sup>-1</sup> = 3458 (NH), 3338 (NH), 1607 (C=N); <sup>1</sup>H NMR (500 MHz, CDCl<sub>3</sub>)  $\delta = 3.98$  (s, 3H, OCH<sub>3</sub>), 3.98 (s, 3H, OCH<sub>3</sub>), 6.18 (brs, 2H, NH<sub>2</sub>), 6.73 (dd,  $J_1 = 8.9$ ,  $J_2 = 4.8$  Hz, 1H, ArH), 6.93–6.97 (m, 1H, ArH), 7.30 (s, 1H, ArH), 7.35 (dd,  $J_1 = 9.7$ ,  $J_2 = 2.8$  Hz, 1H, ArH), 7.47 (s, 1H, ArH) ppm; <sup>13</sup>C NMR (100 MHz, CDCl<sub>3</sub>+DMSO-*d*<sub>6</sub>)  $\delta = 55.6, 55.7, 101.8, 103.8, 113.9$  (d,  $J_{C-F} = 23.7$  Hz), 114.5, 117.4 (d,  $J_{C-F} = 6.2$  Hz), 117.7 (d,  $J_{C-F} = 22.5$  Hz), 124.7, 142.6, 147.6 (d,  $J_{C-F} = 80$ ), 147.9, 148.7, 153.6 (d,  $J_{C-F} = 233.7$ ), 165.4 ppm; HRMS (ESI)  $m/z$ : calcd. for C<sub>15</sub>H<sub>13</sub>FN<sub>2</sub>O<sub>2</sub>S [M + H<sup>+</sup>]: 305.0760, found: 305.0709.

**2-(5,6-Dimethoxybenzo[*d*]thiazol-2-yl)-4-methylaniline (4A).** Yield: 65% (0.12 g from 0.10 g) as a yellow solid; m.p. 163-165 °C;  $R_f = 0.49$  (hexane/EtOAc, 70:30, v/v); IR (neat):  $\nu_{\max}$  (cm)<sup>-1</sup> = 3489 (NH), 3363 (NH), 1610 (C=N); <sup>1</sup>H NMR (500 MHz, CDCl<sub>3</sub>)  $\delta = 2.30$  (s, 3H, CH<sub>3</sub>), 3.97 (s, 3H, OCH<sub>3</sub>), 3.98 (s, 3H, OCH<sub>3</sub>), 6.13 (brs, 2H, NH<sub>2</sub>), 6.71 (d,  $J = 8.2$  Hz, 1H, ArH), 7.02 (dd,  $J_1 =$

8.2,  $J_2 = 1.6$  Hz, 1H, ArH), 7.30 (s, 1H, ArH), 7.44 (s, 1H, ArH), 7.46 (s, 1H, ArH) ppm;  $^{13}\text{C}$  NMR (125 MHz,  $\text{CDCl}_3$ )  $\delta = 20.5, 56.2, 56.5, 102.4, 104.5, 115.8, 117.1, 125.4, 126.2, 129.8, 132.2, 144.1, 148.2, 148.4, 149.2, 167.7$  ppm; HRMS (ESI)  $m/z$ : calcd. for  $\text{C}_{16}\text{H}_{16}\text{N}_2\text{O}_2\text{S}$  [ $\text{M} + \text{H}^+$ ]: 301.1011, found: 301.0092.

**2-(5,6-Dimethoxybenzo[*d*]thiazol-2-yl)-4-methoxyaniline (5A).** Yield: 67% (0.12 g from 0.10 g) as a yellow solid; m.p. 125-128 °C;  $R_f = 0.30$  (hexane/EtOAc, 70:30, v/v); IR (neat):  $\nu_{\text{max}}$  ( $\text{cm}^{-1}$ ) = 3324 (NH), 3200 (NH), 1604 (C=N);  $^1\text{H}$  NMR (500 MHz,  $\text{CDCl}_3$ )  $\delta = 3.82$  (s, 3H,  $\text{OCH}_3$ ), 3.97 (s, 3H,  $\text{OCH}_3$ ), 3.98 (s, 3H,  $\text{OCH}_3$ ), 5.95 (s, 2H,  $\text{NH}_2$ ), 6.75 (d,  $J = 8.8$  Hz, 1H, ArH), 6.87 (dd,  $J_1 = 8.8, J_2 = 2.8$  Hz, 1H, ArH), 7.17 (d,  $J = 2.8$  Hz, 1H, ArH), 7.29 (s, 1H, ArH), 7.47 (s, 1H, ArH) ppm;  $^{13}\text{C}$  NMR (125 MHz,  $\text{CDCl}_3$ )  $\delta = 56.1, 56.2, 56.4, 102.3, 104.5, 113.7, 116.2, 118.3, 118.7, 125.5, 140.7, 148.2, 148.5, 149.3, 151.3, 167.2$  ppm; HRMS (ESI)  $m/z$ : calcd. for  $\text{C}_{16}\text{H}_{16}\text{N}_2\text{O}_3\text{S}$  [ $\text{M} + \text{H}^+$ ]: 317.0960, found: 317.0939.

**5-Bromo-2-(5,6-dimethoxybenzo[*d*]thiazol-2-yl)aniline (6A).** Yield: 52% (0.084 g from 0.100 g); m.p. 194-196 °C;  $R_f = 0.56$  (hexane/EtOAc, 70:30, v/v); IR (neat):  $\nu_{\text{max}}$  ( $\text{cm}^{-1}$ ) = 3442 (NH), 3299 (NH), 1622 (C=N);  $^1\text{H}$  NMR (500 MHz,  $\text{CDCl}_3$ )  $\delta = 3.97$  (s, 3H,  $\text{OCH}_3$ ), 3.98 (s, 3H,  $\text{OCH}_3$ ), 6.42 (brs, 2H,  $\text{NH}_2$ ), 6.83 (d,  $J = 7.6$  Hz, 1H, ArH), 6.94 (s, 1H, ArH), 7.29–7.31 (m, 1H, ArH), 7.45 (d,  $J = 3.2$  Hz, 1H, ArH), 7.48 (d,  $J = 8.4$  Hz, 1H, ArH) ppm; The  $^{13}\text{C}$ -NMR spectrum of **6A** could not be recorded due to solubility problem in  $\text{CDCl}_3$  as well as  $\text{DMSO-}d_6$ ; HRMS (ESI)  $m/z$ : calcd. for  $\text{C}_{15}\text{H}_{13}\text{BrN}_2\text{O}_2\text{S}$  [ $\text{M} + \text{H}^+$ ]: 364.9959, [ $\text{M} + 2 + \text{H}^+$ ]: 366.9939 found: 364.9946 (100%), 366.9923 (97%).

**2-Bromo-6-(5,6-dimethoxybenzo[*d*]thiazol-2-yl)aniline (7A).** Yield: 62% (0.10 g from 0.10 g) as a yellow solid; m.p. 181-182 °C;  $R_f = 0.51$  (hexane/EtOAc, 70:30, v/v); IR (neat):  $\nu_{\text{max}}$  ( $\text{cm}^{-1}$ ) = 3480 (NH), 3376 (NH), 1611 (CONH);  $^1\text{H}$  NMR (500 MHz,  $\text{CDCl}_3$ )  $\delta = 3.98$  (s, 3H,  $\text{OCH}_3$ ), 3.99 (s, 3H,  $\text{OCH}_3$ ), 6.61 (t,  $J = 7.9$  Hz, 1H, ArH), 6.96 (s, 2H,  $\text{NH}_2$ ), 7.29 (s, 1H, ArH), 7.47 (s, 1H, ArH), 7.49 (dd,  $J_1 = 7.8, J_2 = 1.3$  Hz, 1H, ArH), 7.63 (dd,  $J_1 = 7.9, J_2 = 1.3$  Hz, 1H, ArH) ppm;  $^{13}\text{C}$  NMR (125 MHz,  $\text{DMSO-}d_6$ )  $\delta = 55.8, 56.0, 103.2, 104.4, 109.8, 115.6, 116.9, 124.7, 129.1, 134.3, 143.6, 146.9, 148.4, 149.3, 165.8$  ppm; HRMS (ESI)  $m/z$ : calcd. for  $\text{C}_{15}\text{H}_{13}\text{BrN}_2\text{O}_2\text{S}$  [ $\text{M} + \text{H}^+$ ]: 364.9959, [ $\text{M} + 2 + \text{H}^+$ ]: 366.9939, found: 364.9951 (100%), 366.9931 (97%).

**2-(5,6-Dimethoxybenzo[*d*]thiazol-2-yl)-6-fluoroaniline (8A).** Yield: 54% (0.10 g from 0.10 g) as a brown solid; m.p. 203-205 °C;  $R_f = 0.56$  (hexane/EtOAc, 70:30, v/v); IR (neat):  $\nu_{\text{max}}$  ( $\text{cm}^{-1}$ )

= 3490 (NH), 3320 (NH), 1622 (C=N);  $^1\text{H}$  NMR (500 MHz,  $\text{CDCl}_3$ )  $\delta$  = 3.98 (s, 3H,  $\text{OCH}_3$ ), 3.99 (s, 3H,  $\text{OCH}_3$ ), 6.38 (s, 2H,  $\text{NH}_2$ ), 6.63–6.67 (m, 1H, ArH), 7.02–7.06 (m, 1H, ArH), 7.30 (s, 1H, ArH), 7.44 (d,  $J$  = 8.0 Hz, 1H, ArH), 7.48 (s, 1H, ArH) ppm;  $^{13}\text{C}$  NMR (125 MHz,  $\text{CDCl}_3$ )  $\delta$  = 56.2, 56.4, 102.3, 104.5, 115.7 (d,  $J_{\text{C-F}}$  = 8.0 Hz), 115.8, 117.5, 117.6, 124.8, 124.9, 125.4, 135.6 (d,  $J_{\text{C-F}}$  = 14.3 Hz), 148.3 (d,  $J_{\text{C-F}}$  = 79.9 Hz), 149.0 (d,  $J_{\text{C-F}}$  = 91.2 Hz), 151.9 (d,  $J_{\text{C-F}}$  = 237.3 Hz), 166.5 ppm; HRMS (ESI)  $m/z$ : calcd. for  $\text{C}_{15}\text{H}_{13}\text{FN}_2\text{O}_2\text{S}$  [ $\text{M} + \text{H}^+$ ]: 305.0760, found: 305.0733.

**2-(6,7-Dihydro-[1,4]dioxino[2',3':4,5]benzo[1,2-*d*]thiazol-2-yl)aniline (1D).** Yield: 64% (0.12 g from 0.10 g) as a yellow solid; m.p. 148-150 °C;  $R_f$  = 0.59 (hexane/EtOAc, 70:30, v/v); IR (neat):  $\nu_{\text{max}}$  ( $\text{cm}^{-1}$ ) = 3444 (NH), 3386 (NH), 1681 (CONH);  $^1\text{H}$  NMR (500 MHz,  $\text{CDCl}_3$ )  $\delta$  = 4.32 (s, 4H,  $(\text{OCH}_2)_2$ ), 6.32 (brs, 2H,  $\text{NH}_2$ ), 6.71–6.74 (m, 1H, ArH), 6.76–6.78 (m, 1H, ArH), 7.18–7.21 (m, 1H, ArH), 7.30 (s, 1H, ArH), 7.45 (s, 1H, ArH), 7.63 (dd,  $J_1$  = 7.9,  $J_2$  = 1.3 Hz, 1H, ArH) ppm;  $^{13}\text{C}$  NMR (100 MHz,  $\text{CDCl}_3$ )  $\delta$  = 64.4, 64.5, 108.3, 109.9, 115.7, 116.8, 117.0, 126.4, 130.1, 131.3, 142.8, 143.3, 146.5, 148.7, 168.2 ppm; HRMS (ESI)  $m/z$ : calcd. for  $\text{C}_{15}\text{H}_{12}\text{N}_2\text{O}_2\text{S}$  [ $\text{M} + \text{H}^+$ ]: 285.0698, found: 285.0663.

**2-([1,3]Dioxolo[4',5':4,5]benzo[1,2-*d*]thiazol-6-yl)aniline (1E).** Yield: 78% (0.14 g from 0.10 g) as a yellow solid; m.p. 130-132 °C;  $R_f$  = 0.76 (hexane/EtOAc, 70:30, v/v); IR (neat):  $\nu_{\text{max}}$  ( $\text{cm}^{-1}$ ) = 3489 (NH), 3392 (NH), 1681 (CONH);  $^1\text{H}$  NMR (500 MHz,  $\text{CDCl}_3$ )  $\delta$  = 6.06 (s, 2H,  $\text{OCH}_2$ ), 6.27 (s, 2H,  $\text{NH}_2$ ), 6.73 (t,  $J$  = 7.5 Hz, 1H, ArH), 6.77 (d,  $J$  = 8.1 Hz, 1H, ArH), 7.17–7.21 (m, 1H, ArH), 7.24 (s, 1H, ArH), 7.38 (s, 1H, ArH), 7.62–7.63 (m, 1H, ArH) ppm;  $^{13}\text{C}$  NMR (125 MHz,  $\text{DMSO-d}_6$ )  $\delta$  = 100.6, 101.8, 113.7, 115.7, 116.5, 125.4, 129.2, 131.1, 146.3, 146.9, 147.5, 148.0, 167.2 ppm; HRMS (ESI)  $m/z$ : calcd. for  $\text{C}_{14}\text{H}_{10}\text{N}_2\text{O}_2\text{S}$  [ $\text{M} + \text{H}^+$ ]: 271.0541, found: 271.0509.

**4-Chloro-2-(6,7-dihydro-[1,4]dioxino[2',3':4,5]benzo[1,2-*d*]thiazol-2-yl)aniline (2D).** Yield: 68% (0.12 g from 0.10 g) as a yellow solid; m.p. 181-183 °C;  $R_f$  = 0.51 (hexane/EtOAc, 70:30, v/v); IR (neat):  $\nu_{\text{max}}$  ( $\text{cm}^{-1}$ ) = 3450 (NH), 3288 (NH), 1612 (C=N);  $^1\text{H}$  NMR (500 MHz,  $\text{CDCl}_3$ )  $\delta$  = 4.33 (s, 4H,  $(\text{OCH}_2)_2$ ), 6.33 (brs, 2H,  $\text{NH}_2$ ), 6.71 (d,  $J$  = 8.7 Hz, 1H, ArH), 7.13 (dd,  $J_1$  = 8.7,  $J_2$  = 2.3 Hz, 1H, ArH), 7.32 (s, 1H, ArH), 7.45 (s, 1H, ArH), 7.59 (d,  $J$  = 2.3 Hz, 1H, ArH) ppm;  $^{13}\text{C}$  NMR (125 MHz,  $\text{CDCl}_3 + \text{DMSO-d}_6$ )  $\delta$  = 62.2, 62.4, 106.7, 107.6, 112.9, 116.4, 116.9, 123.6, 126.2, 129.0, 141.2, 141.7, 144.4, 146.2, 164.1 ppm; HRMS (ESI)  $m/z$ : calcd. for

$C_{15}H_{11}ClN_2O_2S$  [M + H<sup>+</sup>]: 319.0308, [M + 2 + H<sup>+</sup>]: 321.0279, found: 319.0269 (100%), 321.0245 (33%).

**2-(6,7-Dihydro-[1,4]dioxino[2',3':4,5]benzo[1,2-d]thiazol-2-yl)-4-fluoroaniline (3D).** Yield: 60% (0.11 g from 0.10 g) as a yellow solid; m.p. 188-190 °C;  $R_f = 0.53$  (hexane/EtOAc, 70:30, v/v); IR (neat):  $\nu_{max}$  (cm)<sup>-1</sup> = 3355 (NH), 3271 (NH), 1602 (C=N); <sup>1</sup>H NMR (500 MHz, CDCl<sub>3</sub>)  $\delta$  = 4.33 (s, 4H, (OCH<sub>2</sub>)<sub>2</sub>), 6.15 (brs, 2H, NH<sub>2</sub>), 6.72 (dd,  $J_1 = 8.9$ ,  $J_2 = 4.7$  Hz, 1H, ArH), 6.93–6.97 (m, 1H, ArH), 7.31–7.34 (m, 2H, ArH), 7.46 (s, 1H, ArH) ppm; <sup>13</sup>C NMR (100 MHz, CDCl<sub>3</sub>+DMSO-d<sub>6</sub>)  $\delta$  = 63.1, 63.2, 107.9 (d,  $J_{C-F} = 140$  Hz), 113.1, 113.2, 113.5, 116.8 (d,  $J_{C-F} = 8.0$  Hz), 117.5 (d,  $J_{C-F} = 23$  Hz), 124.8, 141.9, 142.4, 142.6, 147.3, 152.7 (d,  $J_{C-F} = 231$  Hz), 165.3 ppm; HRMS (ESI) m/z: calcd. for  $C_{15}H_{11}FN_2O_2S$  [M + H<sup>+</sup>]: 303.0604, found: 303.0600.

**2-(4,6-Dimethylbenzo[d]thiazol-2-yl)-4-methoxyaniline (5B).** Yield: 81% (0.13 g from 0.10 g) as a yellow solid; m.p. 128-130 °C;  $R_f = 0.71$  (hexane/EtOAc, 70:30, v/v); IR (neat):  $\nu_{max}$  (cm)<sup>-1</sup> = 3374 (NH), 3275 (NH), 1503 (C=N); <sup>1</sup>H NMR (500 MHz, CDCl<sub>3</sub>)  $\delta$  = 2.45 (s, 3H, CH<sub>3</sub>), 2.69 (s, 3H, CH<sub>3</sub>), 3.83 (s, 3H, OCH<sub>3</sub>), 6.09 (brs, 2H, NH<sub>2</sub>), 6.77 (d,  $J = 8.8$  Hz, 1H, ArH), 6.89 (dd,  $J_1 = 8.8$ ,  $J_2 = 2.6$  Hz, 1H, ArH), 7.09 (s, 1H, ArH), 7.19 (d,  $J = 2.6$  Hz, 1H, ArH), 7.50 (s, 1H, ArH) ppm; <sup>13</sup>C NMR (125 MHz, CDCl<sub>3</sub>)  $\delta$  = 18.6, 21.7, 56.1, 113.7, 116.1, 118.4, 118.5, 119.1, 128.4, 131.8, 133.4, 135.1, 141.0, 151.3, 166.7 ppm; HRMS (ESI) m/z: calcd. for  $C_{16}H_{16}N_2OS$  [M + H<sup>+</sup>]: 285.1062, found: 285.1032.

**2-(5,6-Dimethylbenzo[d]thiazol-2-yl)-4-methoxyaniline (5C).** Yield: 85% (0.14 g from 0.10 g) as a brown solid; m.p. 130-132 °C;  $R_f = 0.65$  (hexane/EtOAc, 70:30, v/v); IR (neat):  $\nu_{max}$  (cm)<sup>-1</sup> = 3413 (NH), 3300 (NH), 1661 (C=N); <sup>1</sup>H NMR (500 MHz, CDCl<sub>3</sub>)  $\delta$  = 2.39 (s, 6H, (CH<sub>3</sub>)<sub>2</sub>), 3.82 (s, 3H, OCH<sub>3</sub>), 6.04 (brs, 2H, NH<sub>2</sub>), 6.75 (d,  $J = 8.8$  Hz, 1H, ArH), 6.87–6.89 (m, 1H, ArH), 7.19 (d,  $J = 2.7$  Hz, 1H, ArH), 7.62 (s, 1H, ArH), 7.76 (s, 1H, ArH) ppm; <sup>13</sup>C NMR (125 MHz, CDCl<sub>3</sub>)  $\delta$  = 20.3, 56.11, 113.7, 116.0, 118.3, 119.2, 119.7, 121.3, 122.9, 130.7, 134.5, 135.3, 141.1, 151.2, 152.7, 167.8 ppm; HRMS (ESI) m/z: calcd. for  $C_{16}H_{16}N_2OS$  [M + H<sup>+</sup>]: 285.1062, found: 285.1035.

**2-(6,7-Dihydro-[1,4]dioxino[2',3':4,5]benzo[1,2-d]thiazol-2-yl)-4-methoxyaniline (5D).** Yield: 76% (0.13 g from 0.10 g) as a yellow solid; m.p. 125-128 °C;  $R_f = 0.54$  (hexane/EtOAc, 70:30, v/v); IR (neat):  $\nu_{max}$  (cm)<sup>-1</sup> = 3445 (NH), 3366 (NH), 1610 (C=N); <sup>1</sup>H NMR (500 MHz, CDCl<sub>3</sub>)  $\delta$  = 3.81 (s, 3H, OCH<sub>3</sub>), 4.32 (s, 4H, (OCH<sub>2</sub>)<sub>2</sub>), 5.97 (brs, 2H, NH<sub>2</sub>), 6.74 (d,  $J = 8.8$  Hz, 1H,

ArH), 6.87 (dd,  $J_1 = 8.8$ ,  $J_2 = 2.7$  Hz, 1H, ArH), 7.15 (d,  $J = 2.7$  Hz, 1H, ArH), 7.31 (s, 1H, ArH), 7.46 (s, 1H, ArH) ppm;  $^{13}\text{C}$  NMR (125 MHz,  $\text{CDCl}_3$ )  $\delta = 56.1, 64.4, 64.5, 108.3, 110.0, 113.7, 116.0, 118.3, 119.1, 126.5, 140.9, 142.9, 143.4, 148.9, 151.3, 167.7$  ppm; HRMS (ESI)  $m/z$ : calcd. for  $\text{C}_{16}\text{H}_{14}\text{N}_2\text{O}_3\text{S}$  [ $\text{M} + \text{H}^+$ ]: 315.0803, found: 315.0783.

**2-([1,3]Dioxolo[4',5':4,5]benzo[1,2-*d*]thiazol-6-yl)-4-methoxyaniline (5E).** Yield: 75% (0.13 g from 0.10 g) as a yellow solid; m.p. 155-157 °C;  $R_f = 0.67$  (hexane/EtOAc, 70:30, v/v); IR (neat):  $\nu_{\text{max}}$  ( $\text{cm}^{-1}$ ) = 3476 (NH), 3325 (NH), 1599 (C=N);  $^1\text{H}$  NMR (500 MHz,  $\text{CDCl}_3$ )  $\delta = 3.83$  (s, 3H,  $\text{OCH}_3$ ), 5.94 (s, 2H,  $\text{NH}_2$ ), 6.08 (s, 2H,  $\text{OCH}_2$ ), 6.77 (d,  $J = 8.9$  Hz, 1H, ArH), 6.89 (dd,  $J_1 = 8.8$ ,  $J_2 = 2.7$  Hz, 1H, ArH), 7.16 (d,  $J = 2.7$  Hz, 1H, ArH), 7.28 (s, 1H, ArH), 7.41 (s, 1H, ArH) ppm;  $^{13}\text{C}$  NMR (125 MHz,  $\text{CDCl}_3$ )  $\delta = 56.1, 100.1, 101.8, 102.4, 113.4, 116.0, 118.4, 118.8, 126.6, 140.7, 146.7, 147.8, 148.8, 151.3, 167.3$  ppm; HRMS (ESI)  $m/z$ : calcd. for  $\text{C}_{15}\text{H}_{12}\text{N}_2\text{O}_3\text{S}$  [ $\text{M} + \text{H}^+$ ]: 301.0647, found: 301.0602.

**4-Methoxy-2-(6-methoxybenzo[*d*]thiazol-2-yl)aniline (5F).** Yield: 77% (0.125 g from 0.100 g) as a yellow solid; m.p. 120-122 °C;  $R_f = 0.64$  (hexane/EtOAc, 70:30, v/v); IR (neat):  $\nu_{\text{max}}$  ( $\text{cm}^{-1}$ ) = 3438 (NH), 3288 (NH), 1598 (C=N);  $^1\text{H}$  NMR (500 MHz,  $\text{CDCl}_3$ )  $\delta = 3.82$  (s, 3H,  $\text{OCH}_3$ ), 3.89 (s, 3H,  $\text{OCH}_3$ ), 5.97 (s, 2H,  $\text{NH}_2$ ), 6.76 (d,  $J = 8.8$  Hz, 1H, ArH), 6.88 (dd,  $J_1 = 8.8$ ,  $J_2 = 2.8$  Hz, 1H, ArH), 7.06 (dd,  $J_1 = 8.9$ ,  $J_2 = 2.5$  Hz, 1H, ArH), 7.17 (d,  $J = 2.7$  Hz, 1H, ArH), 7.34 (d,  $J = 2.4$  Hz, 1H, ArH), 7.86 (d,  $J = 8.9$  Hz, 1H, ArH) ppm;  $^{13}\text{C}$  NMR (125 MHz,  $\text{CDCl}_3 + \text{DMSO-}d_6$ )  $\delta = 55.16, 55.31, 103.3, 112.7, 114.4, 114.6, 117.6, 118.4, 122.3, 133.9, 140.6, 147.5, 150.1, 156.9, 166.6$  ppm; HRMS (ESI)  $m/z$ : calcd. for  $\text{C}_{15}\text{H}_{14}\text{N}_2\text{O}_2\text{S}$  [ $\text{M} + \text{H}^+$ ]: 287.0854, found: 287.0821.

**2-Bromo-6-(5,6-dimethylbenzo[*d*]thiazol-2-yl)aniline (7C).** Yield: 56% (0.083 g from 0.100 g) as a yellow solid; m.p. 140-142 °C;  $R_f = 0.62$  (hexane/EtOAc, 70:30, v/v); IR (neat):  $\nu_{\text{max}}$  ( $\text{cm}^{-1}$ ) = 3480 (NH), 3330 (NH), 1604 (C=N);  $^1\text{H}$  NMR (500 MHz,  $\text{CDCl}_3$ )  $\delta = 2.39$  (s, 3H,  $\text{CH}_3$ ), 2.40 (s, 3H,  $\text{CH}_3$ ), 6.60–6.64 (m, 1H, ArH), 7.04 (s, 2H,  $\text{NH}_2$ ), 7.51 (dd,  $J_1 = 7.3$ ,  $J_2 = 4.0$  Hz, 1H, ArH), 7.63 (s, 1H, ArH), 7.67 (d,  $J = 8.0$  Hz, 1H, ArH), 7.77 (s, 1H, ArH) ppm; The  $^{13}\text{C}$ -NMR spectrum of **7C** could not be recorded due to solubility problem in  $\text{CDCl}_3$  as well as  $\text{DMSO-}d_6$ ; HRMS (ESI)  $m/z$ : calcd. for  $\text{C}_{15}\text{H}_{13}\text{BrN}_2\text{O}_2\text{S}$  [ $\text{M} + \text{H}^+$ ]: 333.0061, [ $\text{M} + 2 + \text{H}^+$ ]: 335.0041, found: 333.0029 (100%), 335.0022 (97.3%).

**2-(6-Ethyl-6H-thiazolo[4,5-c]carbazol-2-yl)aniline (1J).** Yield: 60% (0.116 g from 0.100 g) as a brown solid; m.p. 140-142 °C;  $R_f = 0.59$  (hexane/EtOAc, 70:30, v/v); IR (neat):  $\nu_{\max} (\text{cm})^{-1} = 3464$  (NH), 3320 (NH), 1590 (C=N);  $^1\text{H NMR}$  (500 MHz,  $\text{CDCl}_3$ )  $\delta = 1.49$  (t,  $J = 7.2$  Hz, 3H,  $\text{CH}_2\text{CH}_3$ ), 4.48 (q,  $J = 7.2$  Hz, 2H,  $\text{CH}_2\text{CH}_3$ ), 6.43 (brs, 2H,  $\text{NH}_2$ ), 6.79–6.83 (m, 2H, ArH), 7.21–7.25 (m, 1H, ArH), 7.36–7.39 (m, 1H, ArH), 7.51–7.53 (m, 2H, ArH), 7.54–7.56 (m, 1H, ArH), 7.85 (dd,  $J_1 = 7.8$ ,  $J_2 = 1.2$  Hz, 1H, ArH), 8.09 (d,  $J = 8.8$  Hz, 1H, ArH), 8.17 (d,  $J = 7.7$  Hz, 1H, ArH) ppm;  $^{13}\text{C NMR}$  (100 MHz,  $\text{CDCl}_3$ )  $\delta = 14.2$ , 38.1, 107.9, 109.0, 115.4, 116.1, 116.8, 117.1, 119.6, 120.2, 121.4, 122.0, 125.6, 126.3, 130.1, 131.0, 137.6, 139.9, 146.5, 148.4, 165.7 ppm; HRMS (ESI)  $m/z$ : calcd. for  $\text{C}_{21}\text{H}_{17}\text{N}_3\text{S}$  [ $\text{M} + \text{H}^+$ ]: 344.1221, found: 344.1174.

**4-Chloro-2-(6-ethyl-6H-thiazolo[4,5-c]carbazol-2-yl)aniline (2J).** Yield: 80% (0.167 g from 0.100 g) as a brown solid; m.p. 170-172 °C;  $R_f = 0.54$  (hexane/EtOAc, 70:30, v/v); IR (neat):  $\nu_{\max} (\text{cm})^{-1} = 3471$  (NH), 3287 (NH), 1594 (C=N);  $^1\text{H NMR}$  (500 MHz,  $\text{CDCl}_3$ )  $\delta = 1.50$  (t,  $J = 7.1$  Hz, 3H,  $\text{CH}_2\text{CH}_3$ ), 4.48 (q,  $J = 7.0$  Hz, 2H,  $\text{CH}_2\text{CH}_3$ ), 6.40 (brs, 1H,  $\text{NH}_2$ ), 6.76 (d,  $J = 8.6$  Hz, 1H, ArH), 7.15–7.17 (m, 1H, ArH), 7.39 (t,  $J = 7.1$  Hz, 1H, ArH), 7.51–7.56 (m, 3H, ArH), 7.79–7.80 (m, 1H, ArH), 8.09 (d,  $J = 8.7$  Hz, 1H, ArH), 8.16 (d,  $J = 7.8$  Hz, 1H, ArH) ppm;  $^{13}\text{C NMR}$  (100 MHz,  $\text{CDCl}_3$ )  $\delta = 14.2$ , 38.2, 108.2, 109.1, 115.4, 117.0, 118.1, 119.8, 120.3, 121.4, 121.9, 125.8, 126.3, 129.1, 130.7, 137.7, 139.9, 145.0, 148.2, 164.1 ppm; HRMS (ESI)  $m/z$ : calcd. for  $\text{C}_{21}\text{H}_{16}\text{ClN}_3\text{S}$  [ $\text{M} + \text{H}^+$ ]: 378.0832, [ $\text{M} + 2 + \text{H}^+$ ]: 380.0802, found: 378.0809 (100%), 380.0801 (33%).

**2-(6-Ethyl-6H-thiazolo[4,5-c]carbazol-2-yl)-4-fluoroaniline (3J).** Yield: 72% (0.157 g from 0.100 g) as a brown solid; m.p. 200-202 °C;  $R_f = 0.60$  (hexane/EtOAc, 70:30, v/v); IR (neat):  $\nu_{\max} (\text{cm})^{-1} = 3496$  (NH), 3310 (NH), 1599 (C=N);  $^1\text{H NMR}$  (500 MHz,  $\text{CDCl}_3$ )  $\delta = 1.50$  (t,  $J = 7.1$  Hz, 3H,  $\text{CH}_2\text{CH}_3$ ), 4.48 (q,  $J = 7.2$  Hz, 2H,  $\text{CH}_2\text{CH}_3$ ), 6.24 (brs, 2H,  $\text{NH}_2$ ), 6.77 (dd,  $J_1 = 8.7$ ,  $J_2 = 4.7$  Hz, 1H, ArH), 6.96–7.00 (m, 1H, ArH), 7.39 (t,  $J = 7.1$  Hz, 1H, ArH), 7.53 (t,  $J = 6.3$  Hz, 2H, ArH), 7.55–7.56 (m, 2H, ArH), 8.10 (d,  $J = 8.6$  Hz, 1H, ArH), 8.16 (d,  $J = 7.7$  Hz, 1H, ArH) ppm;  $^{13}\text{C NMR}$  (125 MHz,  $\text{DMSO-d}_6$ )  $\delta = 13.9$ , 37.5, 109.1, 109.9, 113.4 (d,  $J_{\text{C-F}} = 7.5$  Hz), 114.0, 114.1, 114.2, 117.8, 118.6 (d,  $J_{\text{C-F}} = 22.5$  Hz), 119.8 (d,  $J_{\text{C-F}} = 43.7$  Hz), 120.5, 120.7, 124.9, 125.8, 137.2, 139.4, 144.0, 147.6, 153.2 (d,  $J_{\text{C-F}} = 230$  Hz), 163.5 ppm; HRMS (ESI)  $m/z$ : calcd. for  $\text{C}_{21}\text{H}_{16}\text{FN}_3\text{S}$  [ $\text{M} + \text{H}^+$ ]: 362.1127, found: 362.1122.



**2-(6-Ethyl-6H-thiazolo[4,5-c]carbazol-2-yl)-4-methylaniline (4J).** Yield: 68% (0.151 g from 0.100 g) as a yellow solid; m.p. 140-142 °C;  $R_f = 0.61$  (hexane/EtOAc, 70:30, v/v); IR (neat):  $\nu_{\max}(\text{cm})^{-1} = 3499$  (NH), 3306 (NH), 1612 (C=N);  $^1\text{H NMR}$  (500 MHz,  $\text{CDCl}_3$ )  $\delta = 1.50$  (t,  $J = 7.2$  Hz, 3H,  $\text{CH}_2\text{CH}_3$ ), 2.36 (s, 3H,  $\text{CH}_3$ ), 4.48 (q,  $J = 7.2$  Hz, 2H,  $\text{CH}_2\text{CH}_3$ ), 6.24 (s, 2H,  $\text{NH}_2$ ), 6.76 (d,  $J = 8.2$  Hz, 1H, ArH), 7.05–7.06 (m, 1H, ArH), 7.36–7.39 (m, 1H, ArH), 7.51–7.53 (m, 2H, ArH), 7.56 (d,  $J = 6.8$  Hz, 1H, ArH), 7.66 (s, 1H, ArH), 8.09 (d,  $J = 8.7$  Hz, 1H, ArH), 8.19 (d,  $J = 7.7$  Hz, 1H, ArH) ppm;  $^{13}\text{C NMR}$  (125 MHz,  $\text{CDCl}_3$ )  $\delta = 14.2, 20.6, 38.1, 107.8, 109.0, 115.4, 116.0, 117.0, 119.6, 120.2, 121.4, 122.0, 125.6, 126.3, 130.1, 132.0, 137.5, 139.9, 144.2, 148.5, 165.7$  ppm; HRMS (ESI)  $m/z$ : calcd. for  $\text{C}_{22}\text{H}_{19}\text{N}_3\text{S}$  [ $\text{M} + \text{H}^+$ ]: 358.1378, found: 358.1366.

**2-(6-Ethyl-6H-thiazolo[4,5-c]carbazol-2-yl)-4-methoxyaniline (5J).** Yield: 78% (0.164 g from 0.100 g) as a yellow solid; m.p. 145-146 °C;  $R_f = 0.54$  (hexane/EtOAc, 70:30, v/v); IR (neat):  $\nu_{\max}(\text{cm})^{-1} = 3396$  (NH), 3290 (NH), 1594 (C=N);  $^1\text{H NMR}$  (500 MHz,  $\text{CDCl}_3$ )  $\delta = 1.50$  (t,  $J = 7.2$  Hz, 3H,  $\text{CH}_2\text{CH}_3$ ), 3.89 (s, 3H,  $\text{OCH}_3$ ), 4.49 (q,  $J = 7.2$  Hz, 2H,  $\text{CH}_2\text{CH}_3$ ), 6.08 (brs, 2H,  $\text{NH}_2$ ), 6.80 (d,  $J = 8.8$  Hz, 1H, ArH), 6.90 (dd,  $J_1 = 8.8, J_2 = 2.8$  Hz, 1H, ArH), 7.36 (dd,  $J_1 = 4.6, J_2 = 2.0$  Hz, 1H, ArH), 7.38–7.40 (m, 1H, ArH), 7.51–7.54 (m, 2H, ArH), 7.56 (dd,  $J_1 = 6.2, J_2 = 1.6$  Hz, 1H, ArH), 8.10 (d,  $J = 8.7$  Hz, 1H, ArH), 8.18 (d,  $J = 7.7$  Hz, 1H, ArH) ppm;  $^{13}\text{C NMR}$  (125 MHz,  $\text{CDCl}_3$ )  $\delta = 14.2, 38.1, 56.2, 107.9, 109.0, 113.4, 115.3, 116.3, 118.4, 118.9, 119.6, 120.2, 121.3, 121.9, 125.6, 126.3, 137.5, 139.8, 140.9, 148.4, 151.4, 165.2$  ppm; HRMS (ESI)  $m/z$ : calcd. for  $\text{C}_{22}\text{H}_{19}\text{N}_3\text{OS}$  [ $\text{M} + \text{H}^+$ ]: 374.1327, found: 374.1321.

**4-Chloro-2-(naphtho[2,1-d]thiazol-2-yl)aniline (2K).** Yield: 85% (0.146 g from 0.100 g) as a yellow solid; m.p. 175-177 °C;  $R_f = 0.71$  (hexane/EtOAc, 70:30, v/v); IR (neat):  $\nu_{\max}(\text{cm})^{-1} = 3438$  (NH), 3293 (NH), 1613 (C=N);  $^1\text{H NMR}$  (500 MHz,  $\text{CDCl}_3$ )  $\delta = 6.43$  (brs, 2H,  $\text{NH}_2$ ), 6.75 (d,  $J = 8.7$  Hz, 1H, ArH), 7.17 (dd,  $J_1 = 8.7, J_2 = 2.3$  Hz, 1H, ArH), 7.54–7.57 (m, 1H, ArH), 7.60–7.63 (m, 1H, ArH), 7.76 (d,  $J = 2.3$  Hz, 1H, ArH), 7.87 (d,  $J = 8.8$  Hz, 1H, ArH), 7.96 (d,  $J = 8.1$  Hz, 1H, ArH), 8.02 (t,  $J = 8.3$  Hz, 2H, ArH) ppm;  $^{13}\text{C NMR}$  (100 MHz,  $\text{CDCl}_3 + \text{DMSO-d}_6$ )  $\delta = 112.9, 116.8, 117.4, 119.4, 123.5, 124.5, 125.7, 125.8, 126.6, 127.4, 127.9, 129.1, 129.4, 144.7, 149.7, 165.0$  ppm; HRMS (ESI)  $m/z$ : calcd. for  $\text{C}_{17}\text{H}_{11}\text{ClN}_2\text{S}$  [ $\text{M} + \text{H}^+$ ]: 311.0410, [ $\text{M} + 2 + \text{H}^+$ ]: 311.0386, found: 313.0380 (100%), 313.0369 (33%).

**4-Fluoro-2-(naphtho[2,1-*d*]thiazol-2-yl)aniline (3K)**. Yield: 74% (0.132 g from 0.100 g) as a yellow solid; m.p. 144-145 °C;  $R_f = 0.64$  (hexane/EtOAc, 70:30, v/v); IR (neat):  $\nu_{\max}$  (cm)<sup>-1</sup> = 3382 (NH), 3284 (NH), 1606 (C=N); <sup>1</sup>H NMR (500 MHz, CDCl<sub>3</sub>)  $\delta = 6.25$  (brs, 2H, NH<sub>2</sub>), 6.77 (dd,  $J_1 = 8.9$ ,  $J_2 = 4.8$  Hz, 1H, ArH), 6.97–7.01 (m, 1H, ArH), 7.50 (dd,  $J_1 = 9.6$ ,  $J_2 = 2.8$  Hz, 1H, ArH), 7.56 (t,  $J = 7.7$  Hz, 1H, ArH), 7.60–7.64 (m, 1H, ArH), 7.87 (d,  $J = 8.8$  Hz, 1H, ArH), 7.97 (d,  $J = 8.0$  Hz, 1H, ArH), 8.03 (dd,  $J_1 = 8.3$ ,  $J_2 = 5.3$  Hz, 2H, ArH) ppm; <sup>13</sup>C NMR (100 MHz, CDCl<sub>3</sub>)  $\delta = 115.3$  (d,  $J_{C-F} = 23$  Hz), 118.1 (d,  $J_{C-F} = 8.0$  Hz), 118.9 (d,  $J_{C-F} = 23$  Hz), 121.4, 125.8 (d,  $J_{C-F} = 70$  Hz), 127.4 (d,  $J_{C-F} = 25$  Hz), 127.9, 129.1, 130.5, 131.1, 143.1, 151.8, 155.9, 167.2 ppm; HRMS (ESI)  $m/z$ : calcd. for C<sub>17</sub>H<sub>11</sub>FN<sub>2</sub>S [M + H<sup>+</sup>]: 295.0705, found: 295.0665.

***N*-(4-Fluoro-2-(naphtho[1,2-*d*]thiazol-2-yl)phenyl)acetamide (8)**. Yield: 78% (0.089 g from 0.100 g) as a light yellow solid; m.p. 175-177 °C;  $R_f = 0.47$  (hexane/EtOAc, 70:30, v/v); IR (neat):  $\nu_{\max}$  (cm)<sup>-1</sup> = 3395 (NH), 1691 (CONH), 1601 (C=N); <sup>1</sup>H NMR (500 MHz, CDCl<sub>3</sub>)  $\delta = 2.35$  (s, 3H, CH<sub>3</sub>), 7.17–7.21 (m, 1H, ArH), 7.60–7.63 (m, 2H, ArH), 7.66 (t,  $J = 7.5$  Hz, 1H, ArH), 7.93 (d,  $J = 8.8$  Hz, 1H, ArH), 8.00 (d,  $J = 8.0$  Hz, 1H, ArH), 8.03 (d,  $J = 8.7$  Hz, 1H, ArH), 8.06 (d,  $J = 8.0$  Hz, 1H, ArH), 8.81 (dd,  $J_1 = 9.2$ ,  $J_2 = 5.3$  Hz, 1H, ArH), 12.32 (s, 1H, NH) ppm; <sup>13</sup>C NMR (125 MHz, CDCl<sub>3</sub>)  $\delta = 25.6$ , 115.4 (d,  $J_{C-F} = 23.7$  Hz), 118.6 (d,  $J_{C-F} = 21.2$  Hz), 121.0, 122.8, 122.9, 125.4, 126.8, 127.7, 128.2, 129.2, 131.0, 131.4, 134.4, 140.0, 151.0, 158.9, 166.4, 169.2 ppm; HRMS (ESI)  $m/z$ : calcd. for C<sub>19</sub>H<sub>13</sub>FN<sub>2</sub>OS [M + H<sup>+</sup>]: 337.0811, found: 337.0801.

***N*-(2-([1,3]Dioxolo[4',5':4,5]benzo[1,2-*d*]thiazol-6-yl)phenyl)benzamide (9)**. Yield: 88% (0.122 g from 0.100 g) as a yellow solid; m.p. 198-200 °C;  $R_f = 0.59$  (hexane/EtOAc, 70:30, v/v); IR (neat):  $\nu_{\max}$  (cm)<sup>-1</sup> = 3416 (NH), 1705 (CONH), 1595 (C=N); <sup>1</sup>H NMR (500 MHz, DMSO-*d*<sub>6</sub>)  $\delta = 6.00$  (s, 2H, OCH<sub>2</sub>), 7.06–7.09 (m, 1H, ArH), 7.19 (s, 1H, ArH), 7.24 (s, 1H, ArH), 7.37–7.40 (m, 1H, ArH), 7.47–7.53 (m, 3H, ArH), 7.72 (dd,  $J_1 = 7.7$ ,  $J_2 = 1.2$  Hz, 1H, ArH), 8.07 (dd,  $J_1 = 7.7$ ,  $J_2 = 1.7$  Hz, 2H, ArH), 8.88–8.90 (m, 1H, ArH), 13.14 (s, 1H, NH) ppm; <sup>13</sup>C NMR (125 MHz, CDCl<sub>3</sub>)  $\delta = 100.3$ , 101.9, 102.2, 119.8, 120.5, 120.9, 123.4, 126.8, 127.9, 128.9, 128.8, 129.3, 130.3, 131.7, 132.0, 138.0, 147.9, 148.4 ppm; HRMS (ESI)  $m/z$ : calcd. for C<sub>21</sub>H<sub>14</sub>N<sub>2</sub>O<sub>3</sub>S [M + H<sup>+</sup>]: 375.0803, found: 375.0788.

***N*-(2-([1,3]Dioxolo[4',5':4,5]benzo[1,2-*d*]thiazol-6-yl)phenyl)-4-methylbenzene sulfonamide (10)**. Yield: 65% (0.102 g from 0.100 g) as a yellow solid; m.p. 172-174 °C;  $R_f = 0.54$  (hexane/EtOAc, 70:30, v/v); IR (neat):  $\nu_{\max}$  (cm)<sup>-1</sup> = 3462 (NH), 1602 (C=N); <sup>1</sup>H NMR (500

MHz, CDCl<sub>3</sub>)  $\delta$  = 2.28 (s, 3H, CH<sub>3</sub>), 6.11 (s, 2H, OCH<sub>2</sub>), 7.06 (d,  $J$  = 8.1 Hz, 2H, ArH), 7.08–7.10 (m, 1H, ArH), 7.23 (s, 1H, ArH), 7.31–7.35 (m, 2H, ArH), 7.51 (s, 1H, ArH), 7.61–7.63 (m, 2H, ArH), 7.73 (d,  $J$  = 8.1 Hz, 1H, ArH), 12.09 (s, 1H, NH) ppm; <sup>13</sup>C NMR (125 MHz, CDCl<sub>3</sub>)  $\delta$  = 21.6, 100.0, 102.2, 102.6, 120.5, 120.7, 123.8, 126.8, 127.2, 129.3, 129.5, 131.2, 136.5, 136.6, 143.6, 147.7, 148.5, 166.0 ppm; HRMS (ESI)  $m/z$ : calcd. for C<sub>21</sub>H<sub>16</sub>N<sub>2</sub>O<sub>4</sub>S<sub>2</sub> [M + H<sup>+</sup>]: 425.0630, found: 425.0608.

***N*-(2-([1,3]Dioxolo[4',5':4,5]benzo[1,2-*d*]thiazol-6-yl)phenyl)-2-bromoacetamide (11).**

Yield: 90% (0.130 g from 0.100 g) as an off white solid; m.p. 205-207 °C;  $R_f$  = 0.69 (hexane/EtOAc, 70:30, v/v); IR (neat):  $\nu_{\max}$  (cm)<sup>-1</sup> = 3389 (NH), 1691 (CONH), 1599 (C=N); <sup>1</sup>H NMR (500 MHz, CDCl<sub>3</sub>)  $\delta$  = 4.13 (s, 2H, CH<sub>2</sub>Br), 6.10 (s, 2H, OCH<sub>2</sub>), 7.19 (dd,  $J_1$  = 11.8,  $J_2$  = 4.4 Hz, 1H, ArH), 7.27 (s, 1H, ArH), 7.44–7.47 (m, 1H, ArH), 7.48 (s, 1H, ArH), 7.79 (dd,  $J_1$  = 8.1,  $J_2$  = 1.3 Hz, 1H, ArH), 8.73 (d,  $J$  = 7.9 Hz, 1H, ArH), 12.96 (s, 1H, NH) ppm; <sup>13</sup>C NMR (125 MHz, CDCl<sub>3</sub>)  $\delta$  = 30.1, 100.2, 102.2, 102.4, 120.4, 121.1, 124.2, 127.1, 129.3, 131.4, 136.8, 147.6, 148.0, 148.4, 165.4, 166.3 ppm; HRMS (ESI)  $m/z$ : calcd. for C<sub>16</sub>H<sub>11</sub>BrN<sub>2</sub>O<sub>3</sub>S [M + H<sup>+</sup>]: 390.9752, found: 390.9718.

**(*Z*)-5-Chloro-3-((3,4-dimethoxyphenyl)imino)indolin-2-one (12).** Yield: 89% as an Orange solid; m.p. 205-207 °C;  $R_f$  = 0.69 (hexane/EtOAc, 70:30, v/v); IR (neat):  $\nu_{\max}$  (cm)<sup>-1</sup> = 3425 (NH), 1681 (CONH), 1606 (C=N); <sup>1</sup>H NMR (500 MHz, CDCl<sub>3</sub>)  $\delta$  = 3.88 (s, 3H, OCH<sub>3</sub>), 3.96 (s, 3H, OCH<sub>3</sub>), 6.71 (dd,  $J_1$  = 8.3,  $J_2$  = 2.1 Hz, 1H, ArH), 6.75 (d,  $J$  = 2.1 Hz, 1H, ArH), 6.88 (d,  $J$  = 8.3 Hz, 1H, ArH), 6.94 (d,  $J$  = 8.3 Hz, 1H, ArH), 7.17 (d,  $J$  = 1.9 Hz, 1H, ArH), 7.31 (dd,  $J_1$  = 8.3,  $J_2$  = 2.1 Hz, 1H, ArH), 8.95 (s, 1H, NH) ppm; <sup>13</sup>C NMR (125 MHz, CDCl<sub>3</sub>)  $\delta$  = 56.2, 56.3, 104.2, 110.9, 111.5, 113.1, 117.2, 125.6, 128.0, 133.9, 142.1, 144.2, 148.0, 149.8, 152.5, 165.5 ppm; HRMS (ESI)  $m/z$ : calcd. for C<sub>16</sub>H<sub>13</sub>ClN<sub>2</sub>O<sub>3</sub> [M + H<sup>+</sup>]: 317.0693, found: 317.0658.

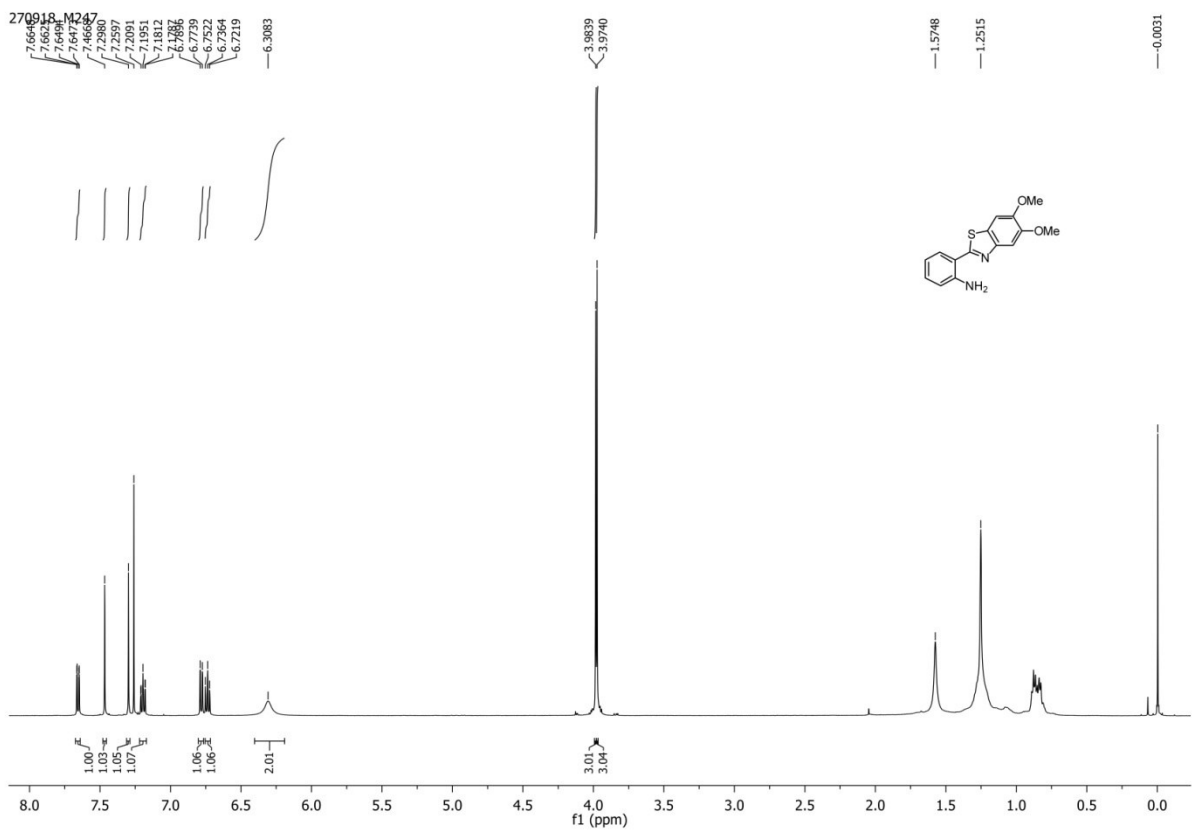

Figure S11. <sup>1</sup>H-NMR spectrum of **1A** in CDCl<sub>3</sub>.

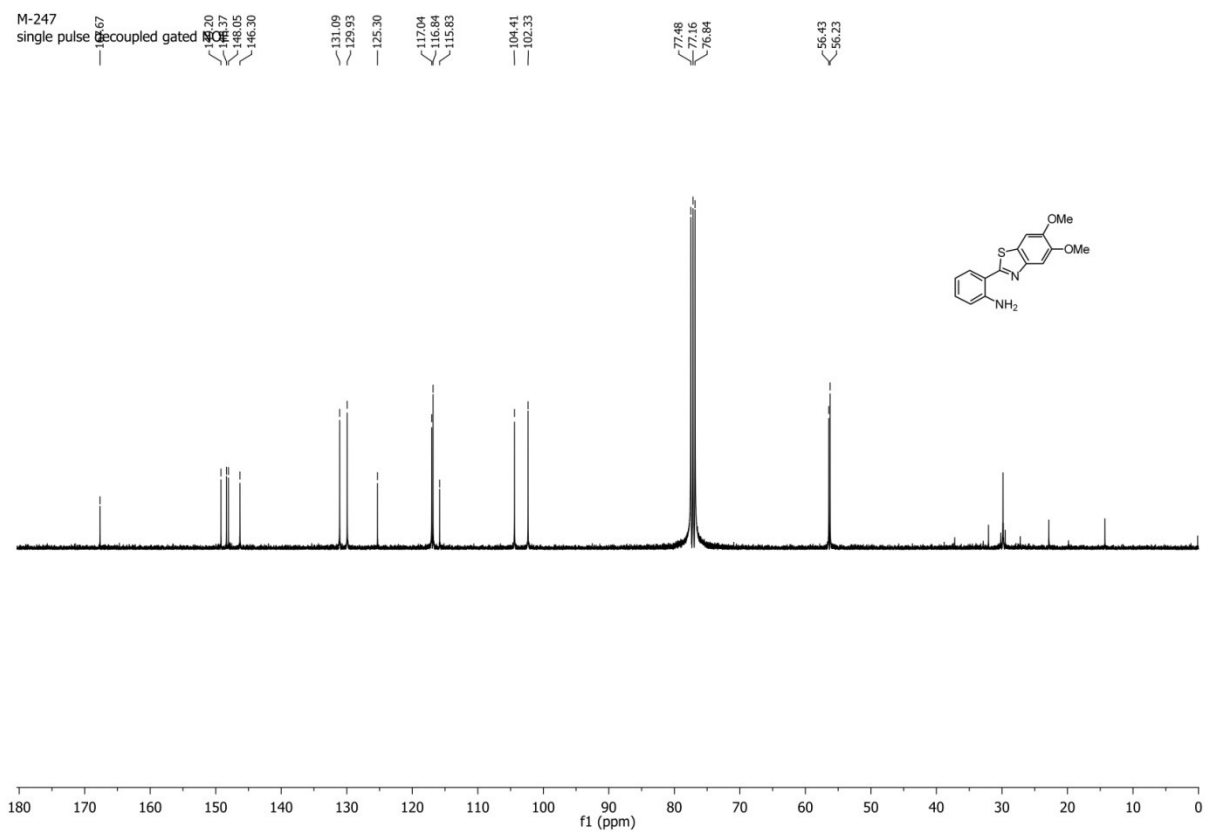

Figure S12. <sup>13</sup>C-NMR spectrum of **1A** in CDCl<sub>3</sub>.

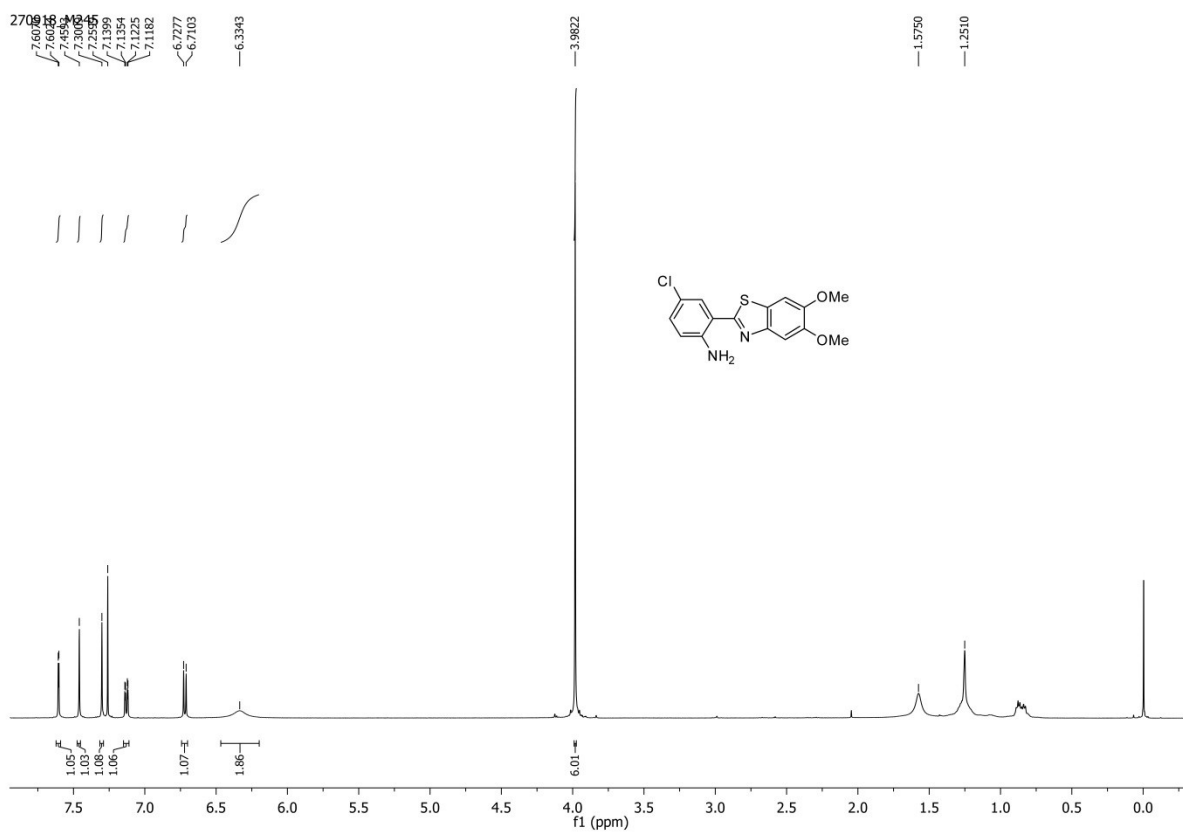

**Figure S13.** <sup>1</sup>H-NMR spectrum of **2A** in CDCl<sub>3</sub>.

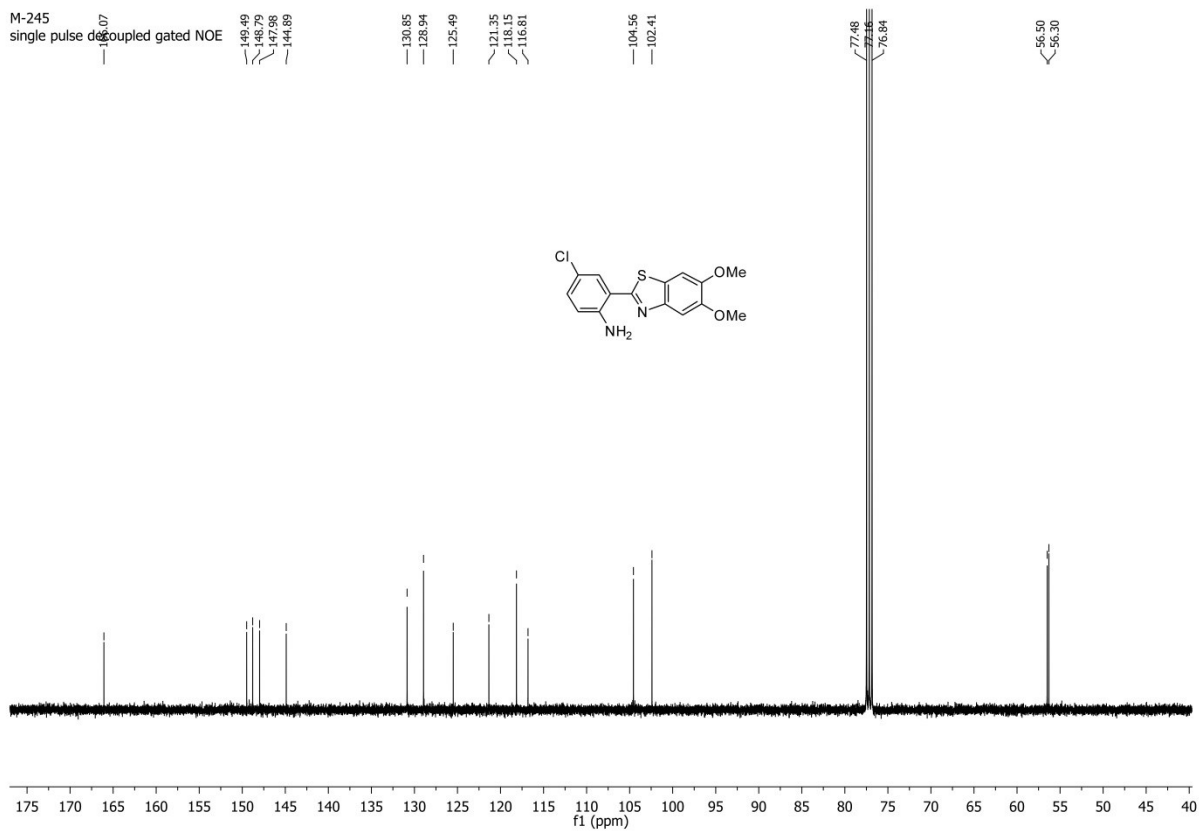

**Figure S14.** <sup>13</sup>C-NMR spectrum of **2A** in CDCl<sub>3</sub>.

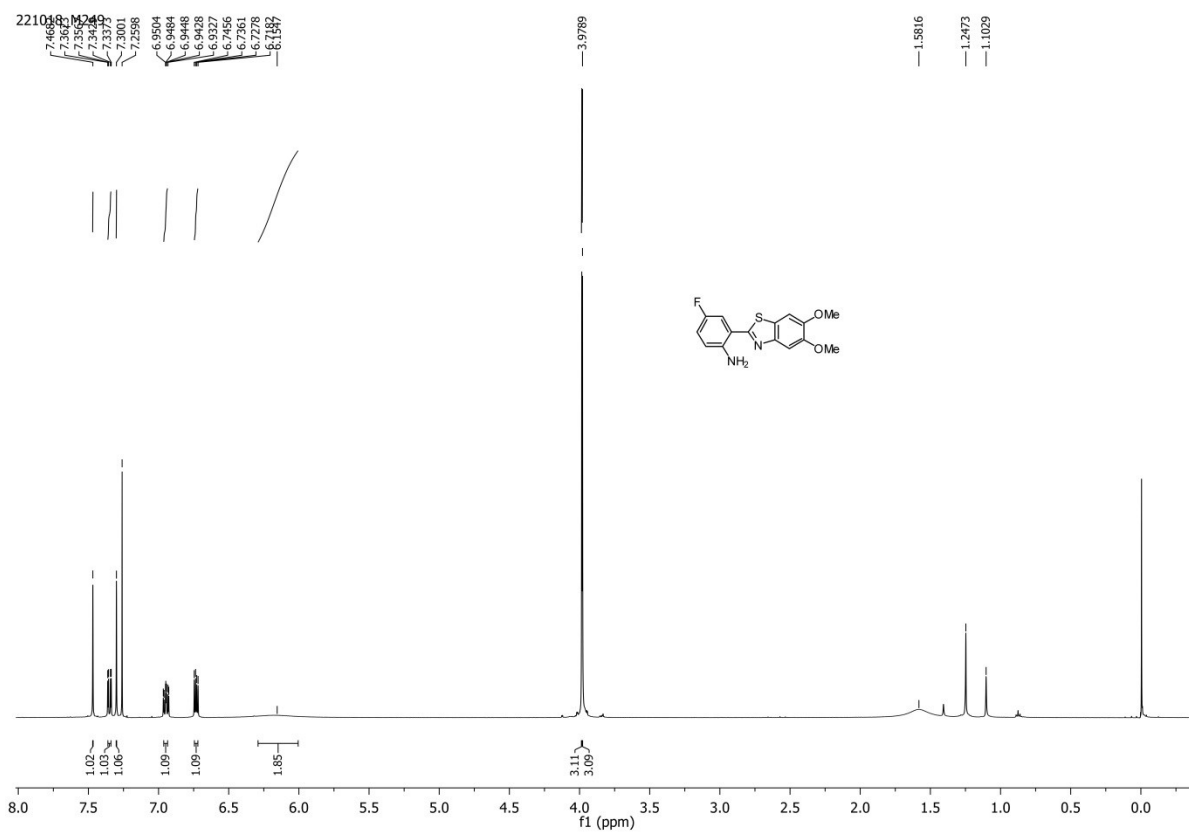

Figure S15. <sup>1</sup>H-NMR spectrum of 3A in CDCl<sub>3</sub>.

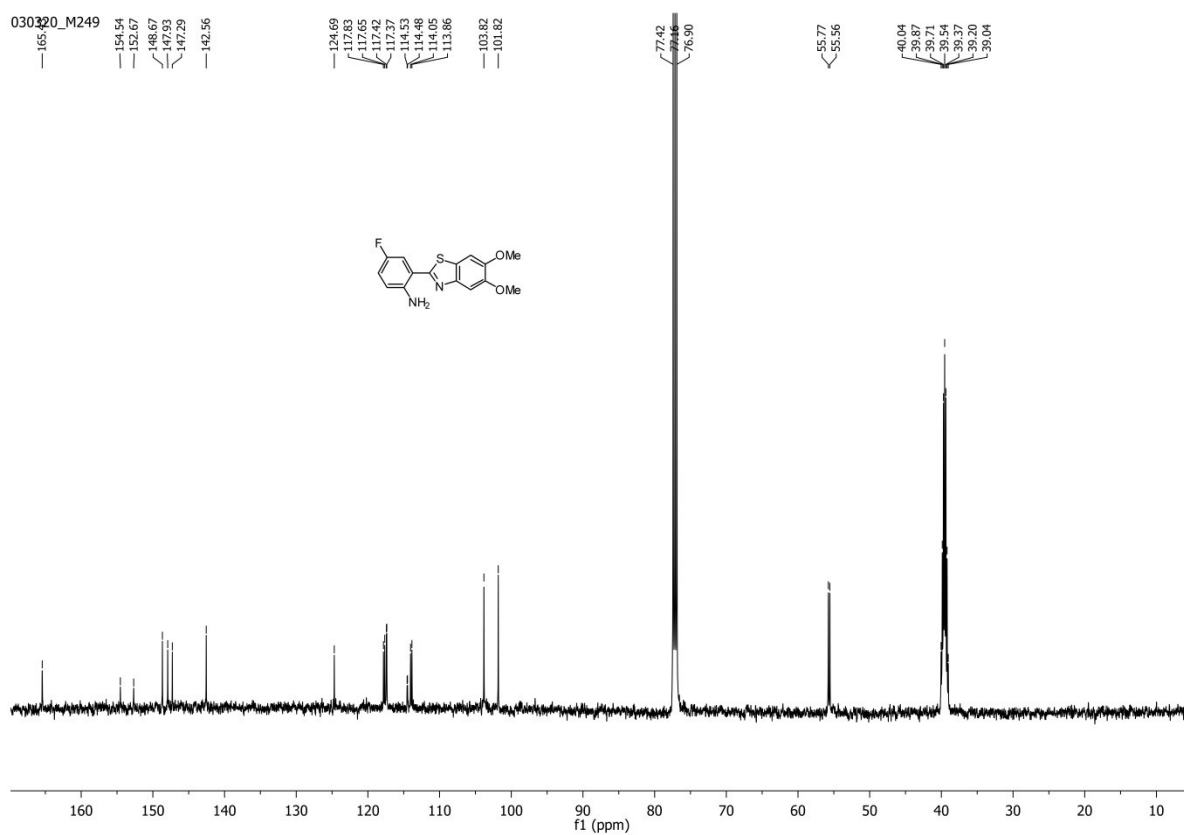

Figure S16. <sup>13</sup>C-NMR spectrum of 3A in a mixture of CDCl<sub>3</sub> + DMSO-d<sub>6</sub>.

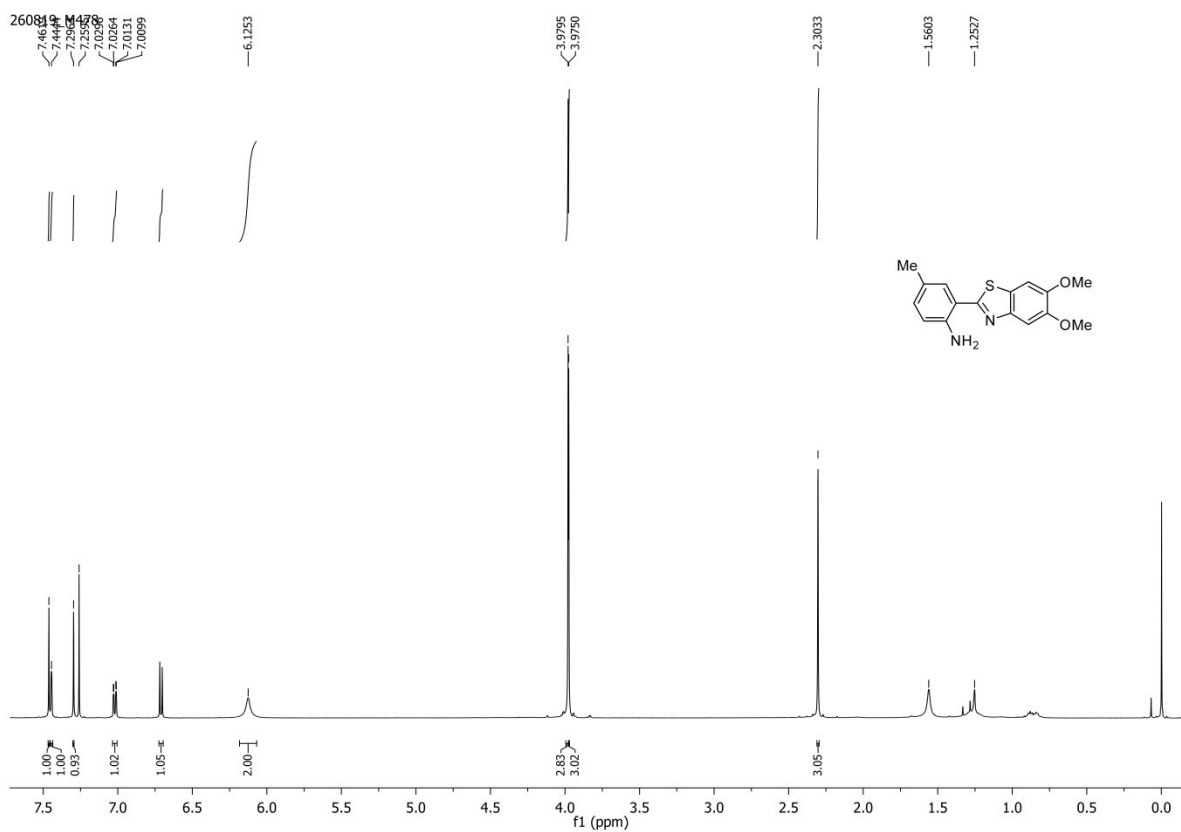

Figure S17. <sup>1</sup>H-NMR spectrum of 4A in CDCl<sub>3</sub>.

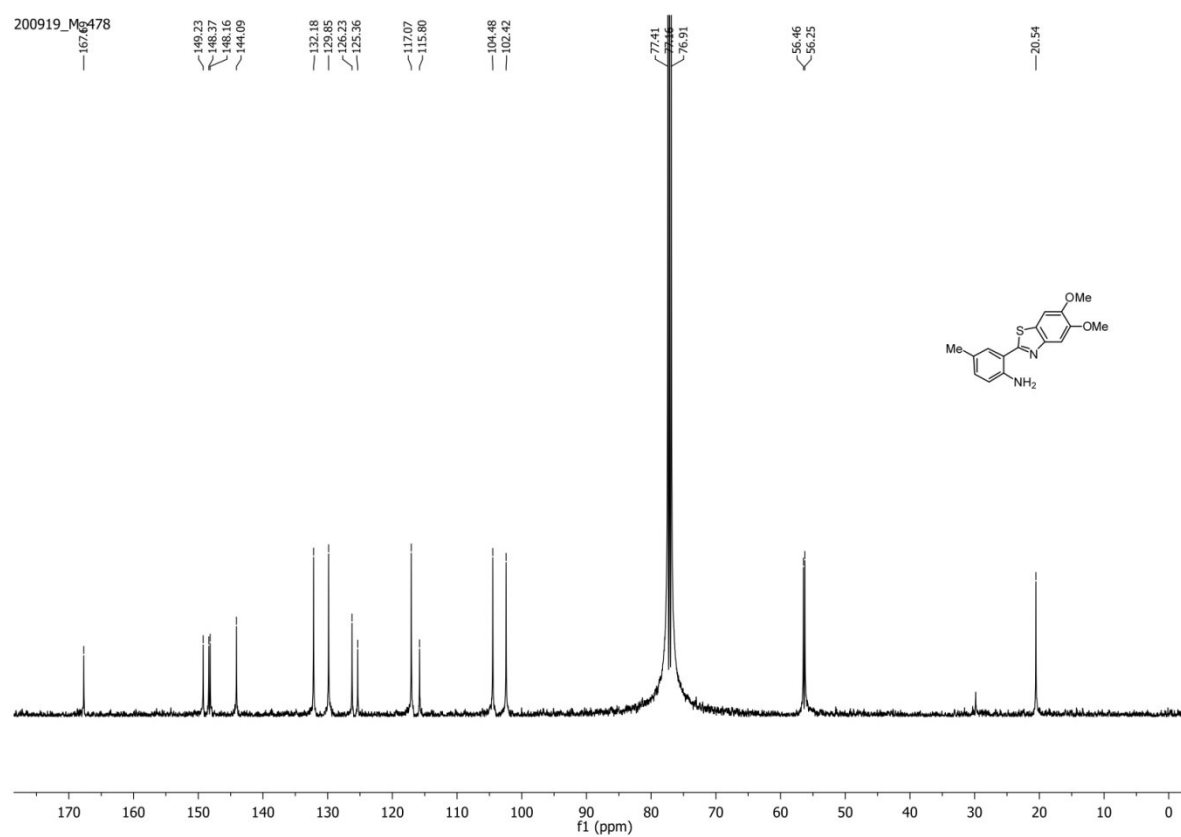

Figure S18. <sup>13</sup>C-NMR spectrum of 4A in CDCl<sub>3</sub>.

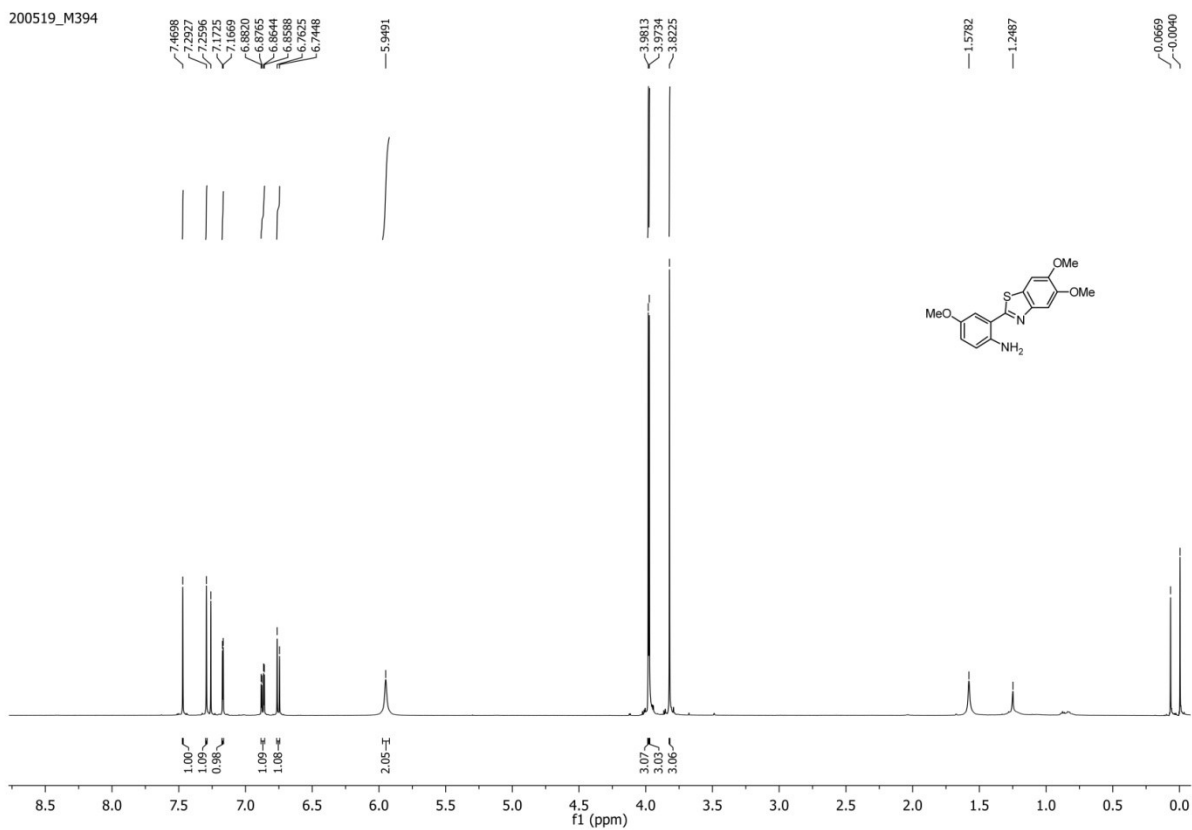

**Figure S19.**  $^1\text{H-NMR}$  spectrum of **5A** in  $\text{CDCl}_3$ .

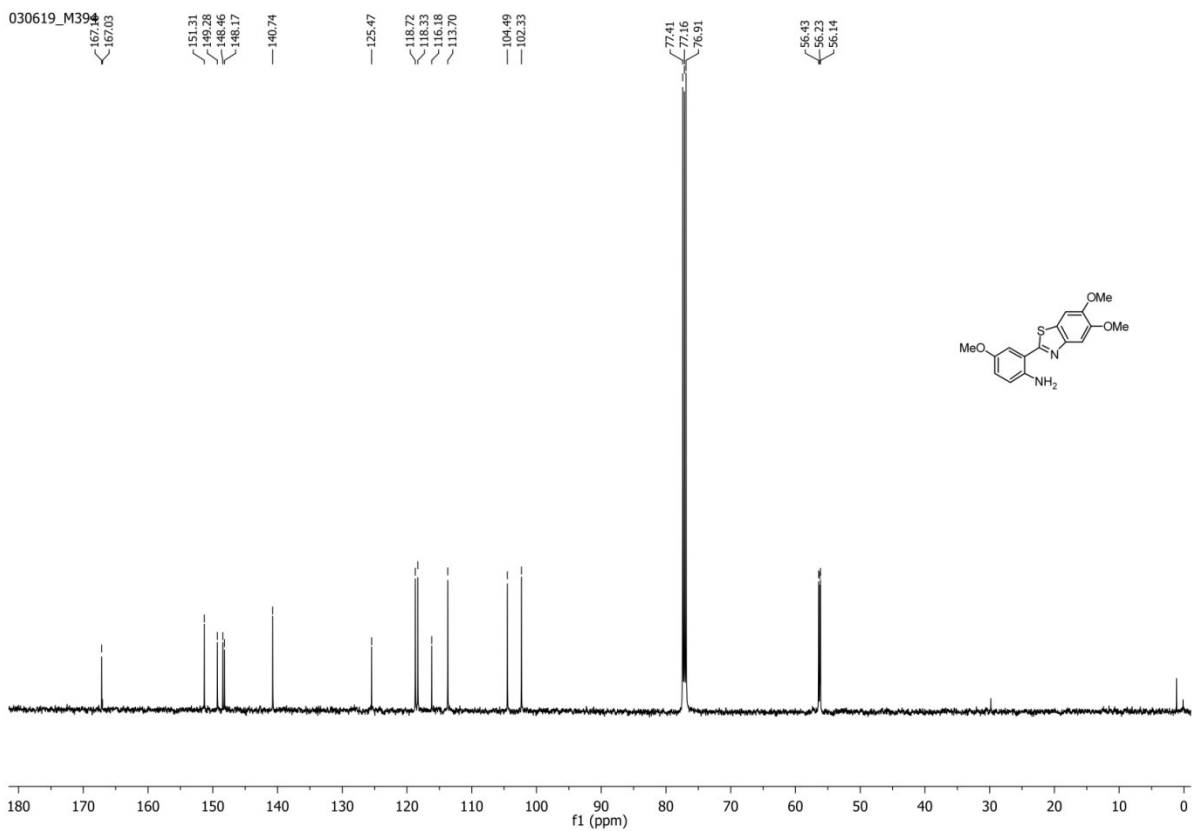

**Figure S20.**  $^{13}\text{C-NMR}$  spectrum of **5A** in  $\text{CDCl}_3$ .



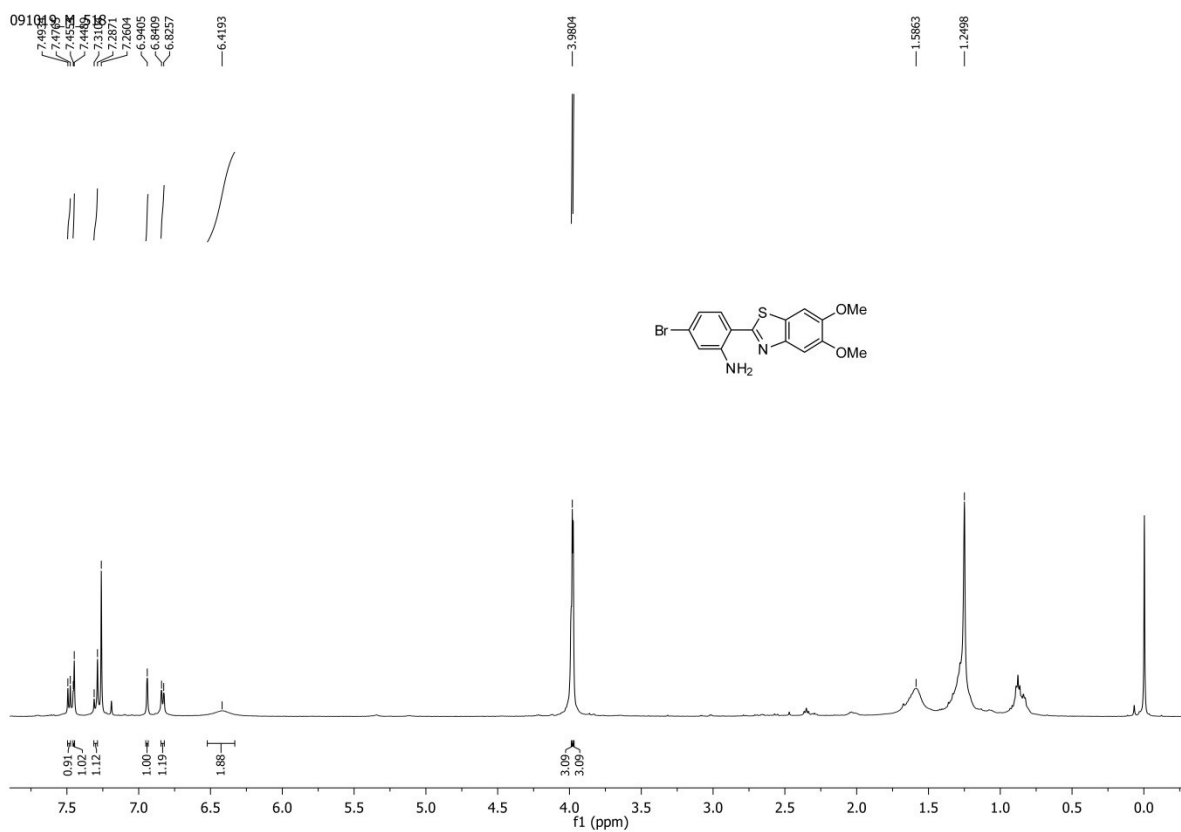

**Figure S21.** <sup>1</sup>H-NMR spectrum of **6A** in CDCl<sub>3</sub>.

It is mentioned that the <sup>13</sup>C-NMR spectrum of **6A** could not be recorded due to solubility problem in CDCl<sub>3</sub> as well as DMSO-*d*<sub>6</sub>.

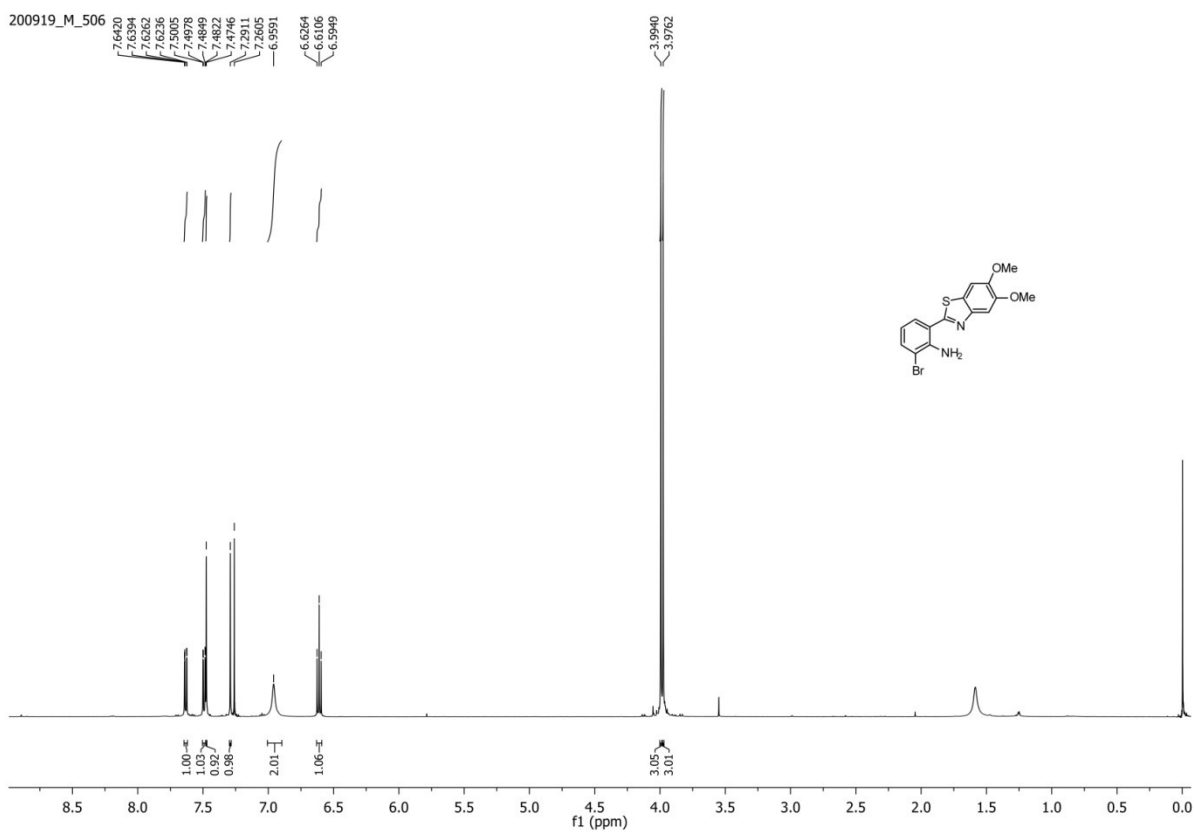

Figure S22.  $^1\text{H-NMR}$  spectrum of **7A** in  $\text{CDCl}_3$ .

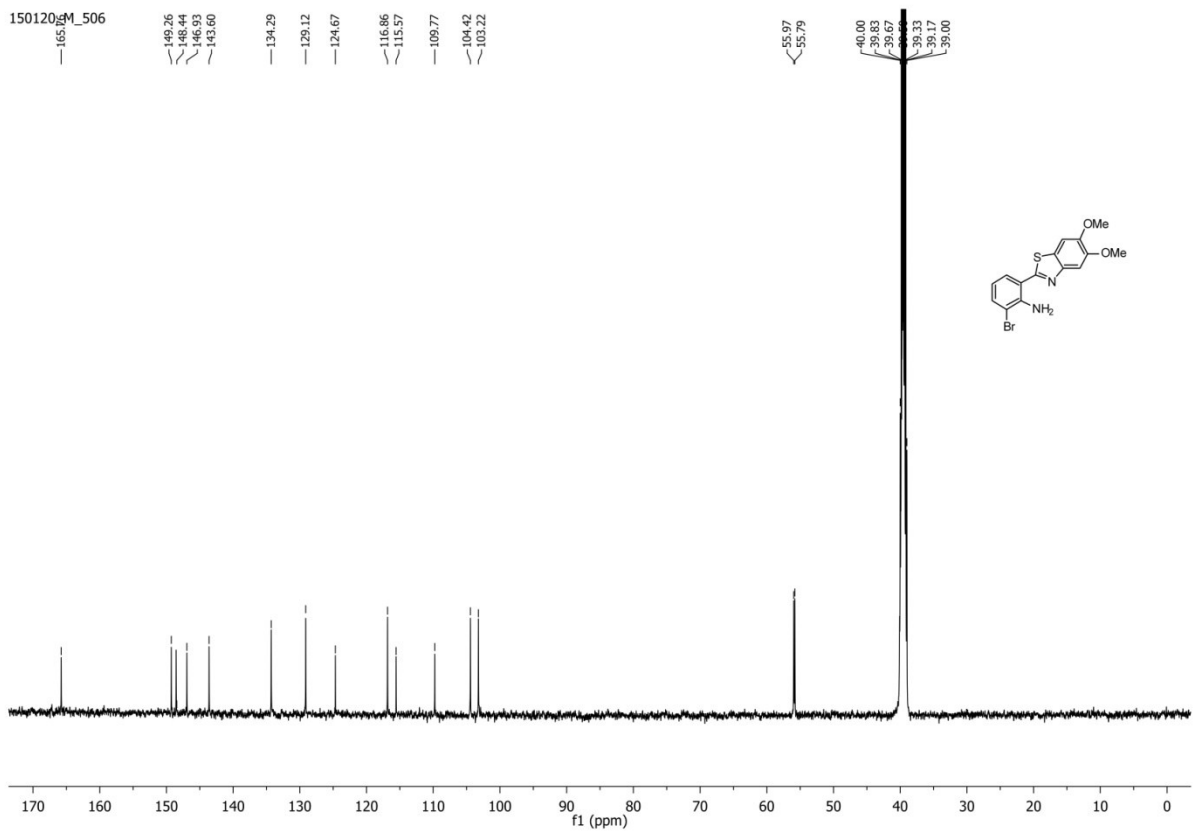

Figure S23.  $^{13}\text{C-NMR}$  spectrum of **7A** in  $\text{DMSO-d}_6$ .

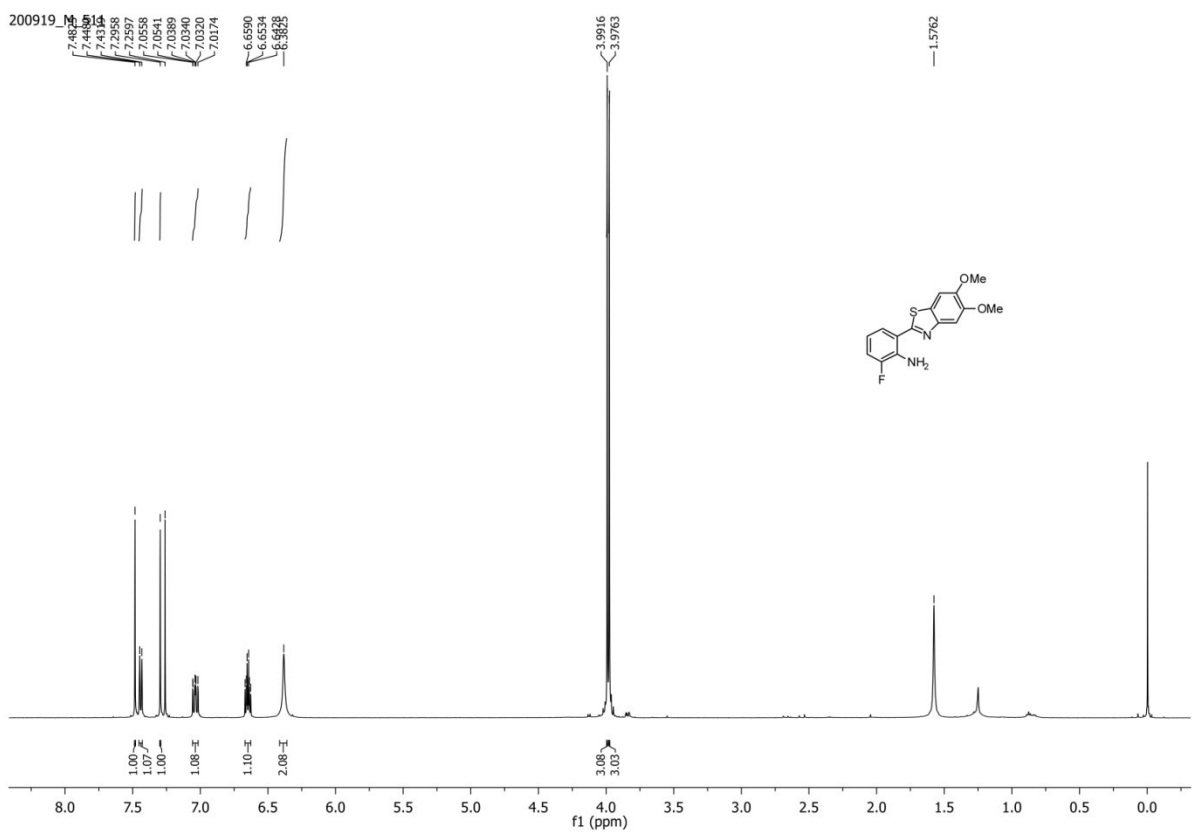

Figure S24.  $^1\text{H-NMR}$  spectrum of **8A** in  $\text{CDCl}_3$ .

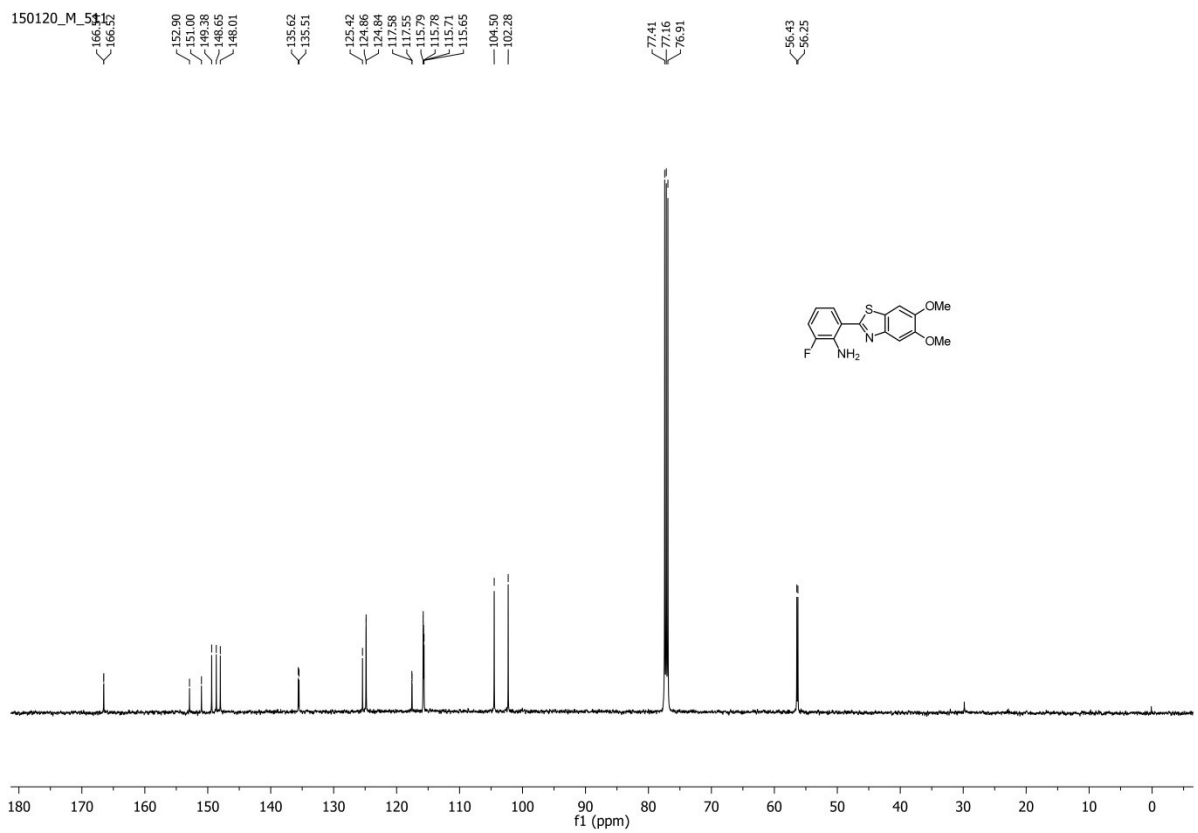

Figure S25.  $^{13}\text{C-NMR}$  spectrum of **8A** in  $\text{CDCl}_3$ .

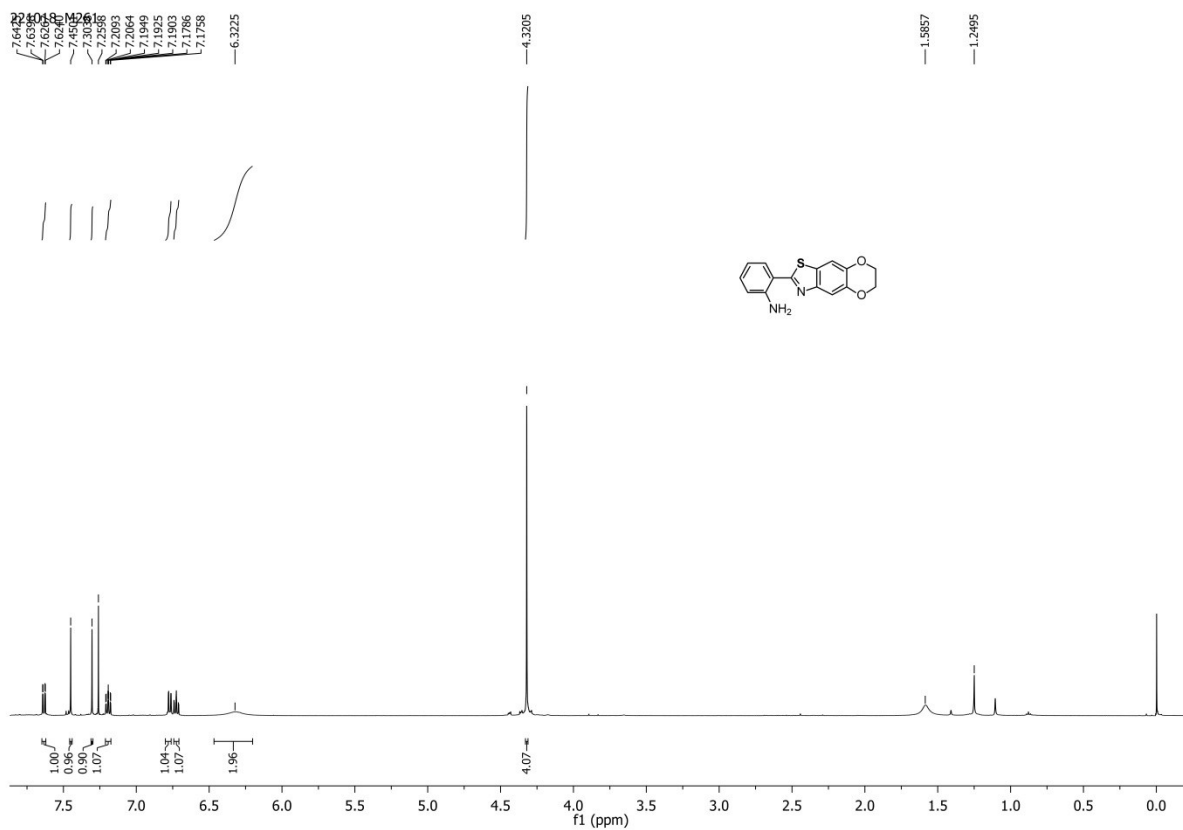

Figure S26. <sup>1</sup>H-NMR spectrum of **1D** in CDCl<sub>3</sub>.

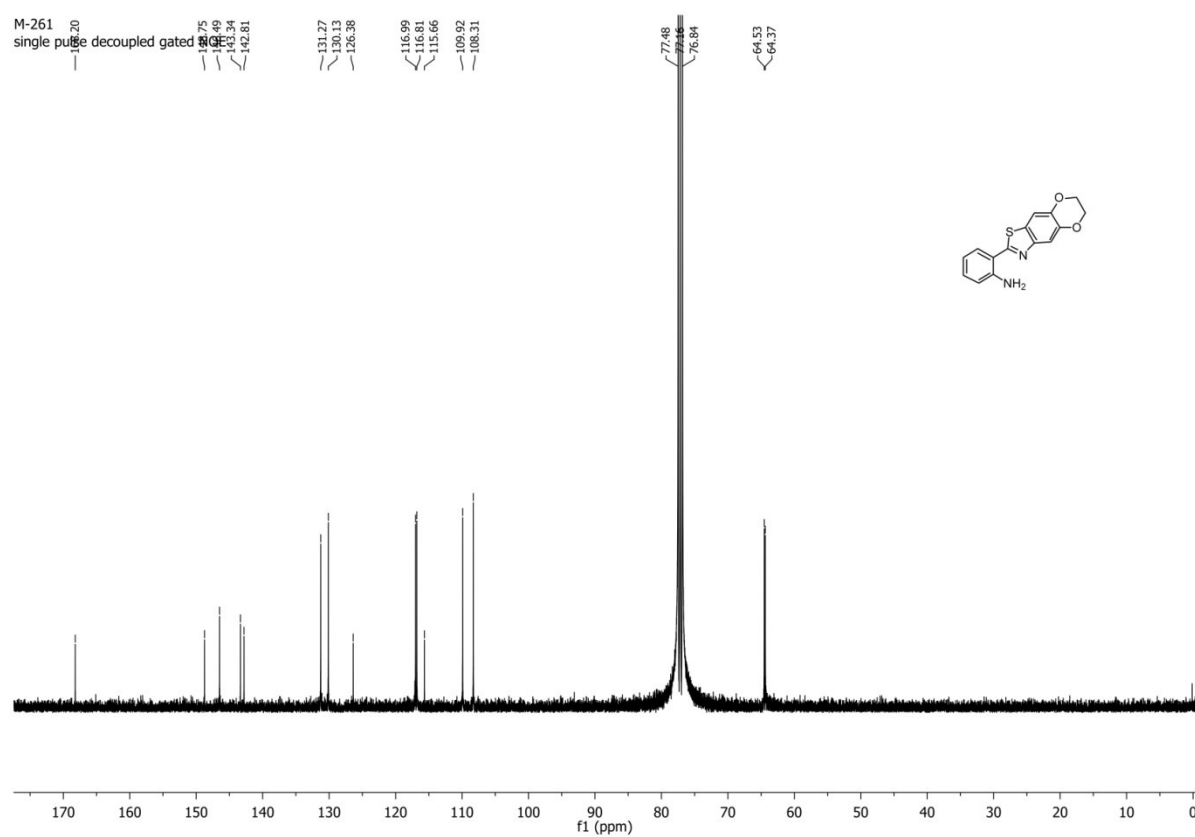

Figure S27. <sup>13</sup>C-NMR spectrum of **1D** in CDCl<sub>3</sub>.

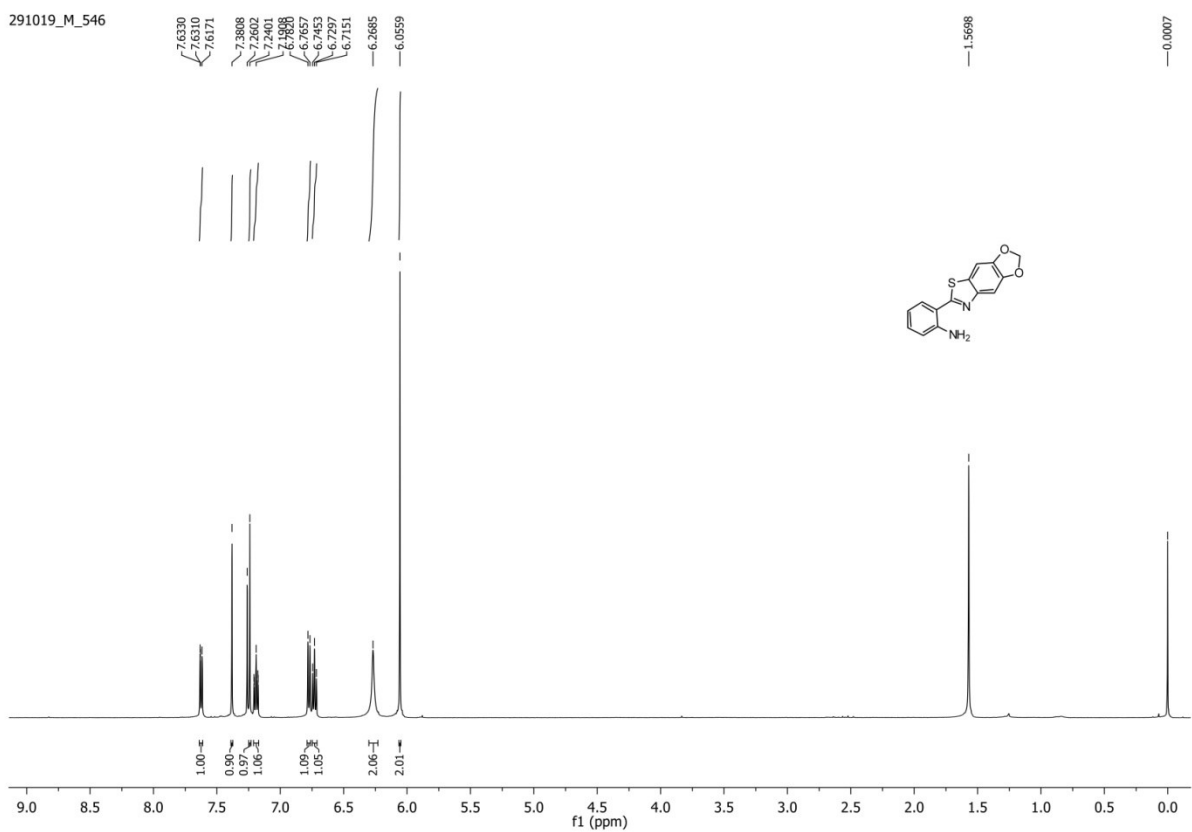

Figure S28.  $^1\text{H-NMR}$  spectrum of **1E** in  $\text{CDCl}_3$ .

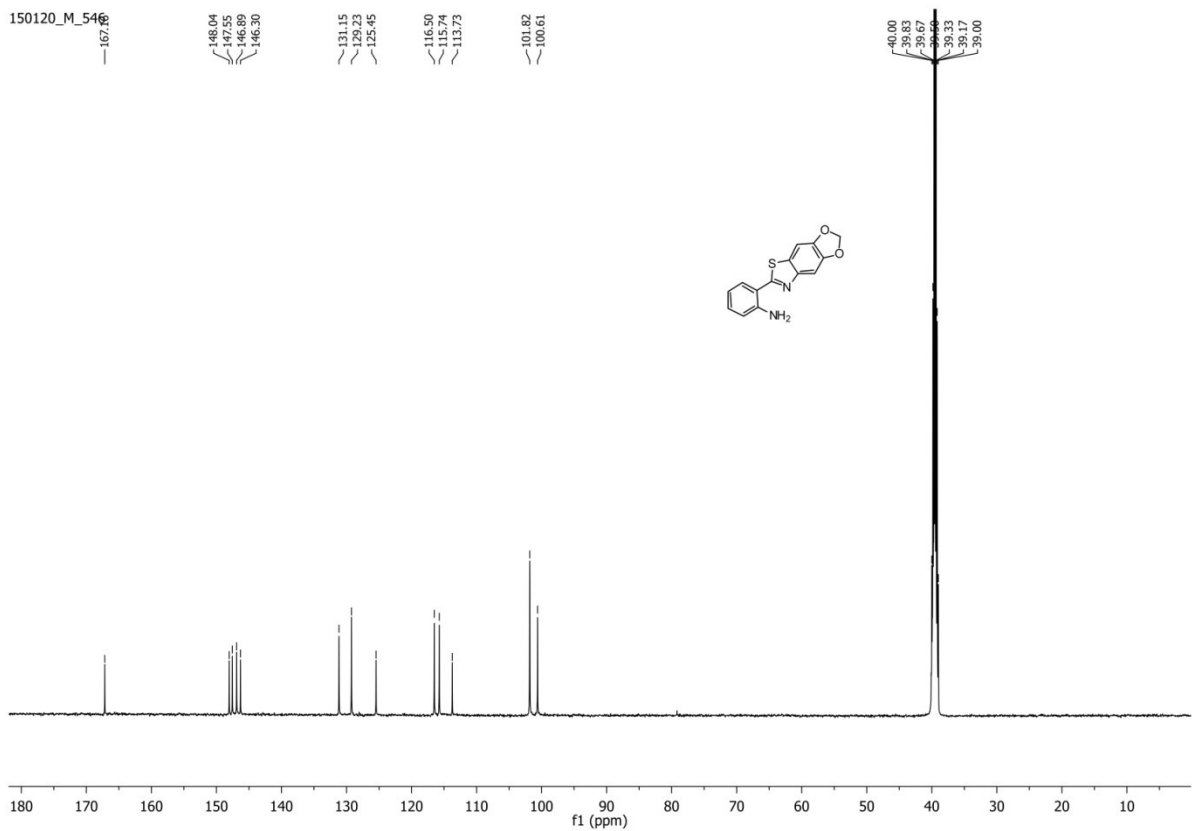

Figure S29.  $^{13}\text{C-NMR}$  spectrum of **1E** in  $\text{DMSO-d}_6$ .

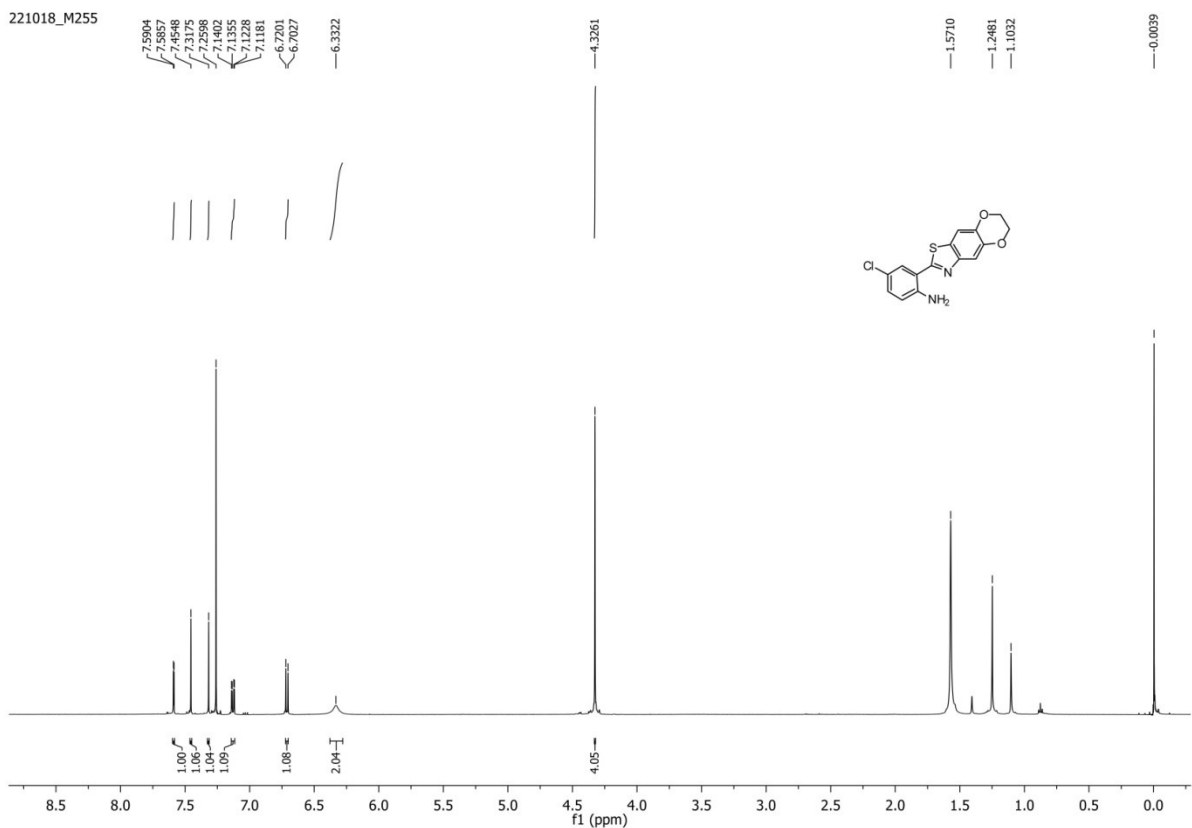

Figure S30.  $^1\text{H-NMR}$  spectrum of **2D** in  $\text{CDCl}_3$ .

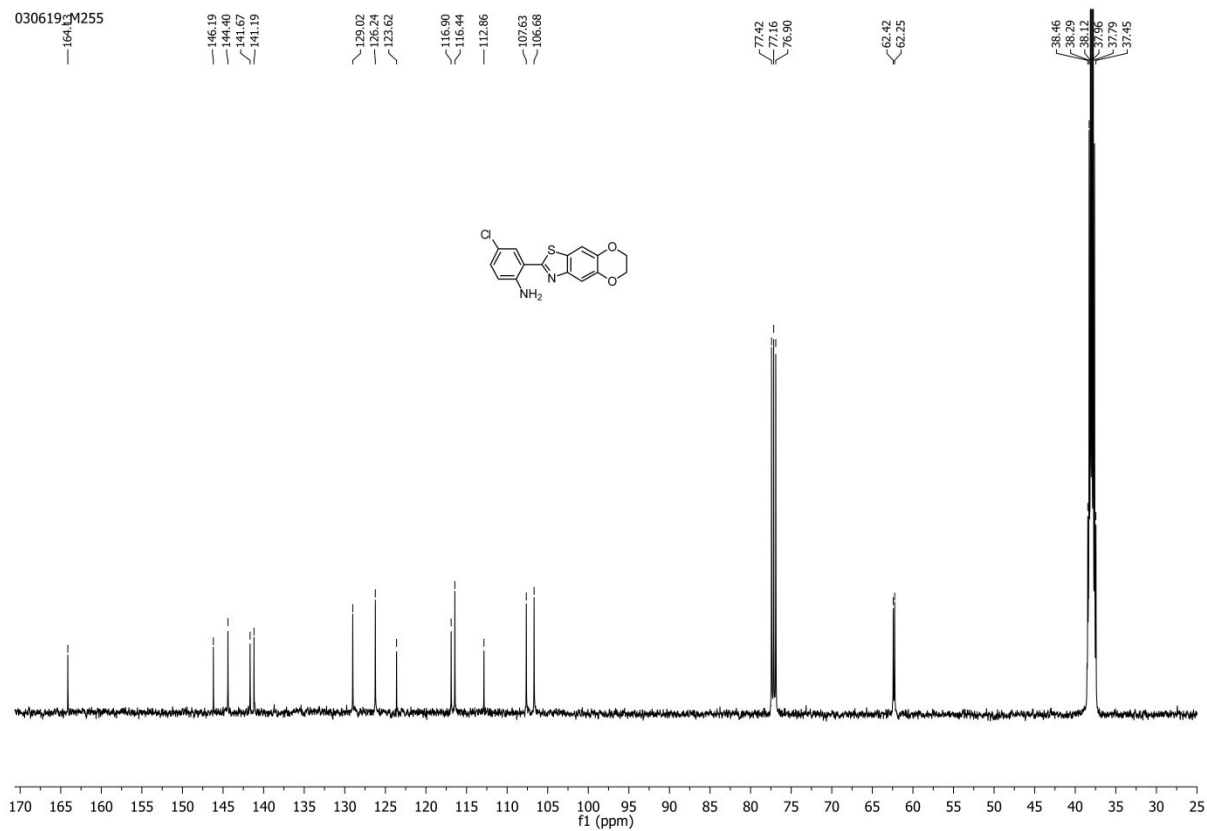

Figure S31.  $^{13}\text{C-NMR}$  spectrum of **2D** in  $\text{CDCl}_3 + \text{DMSO-d}_6$ .

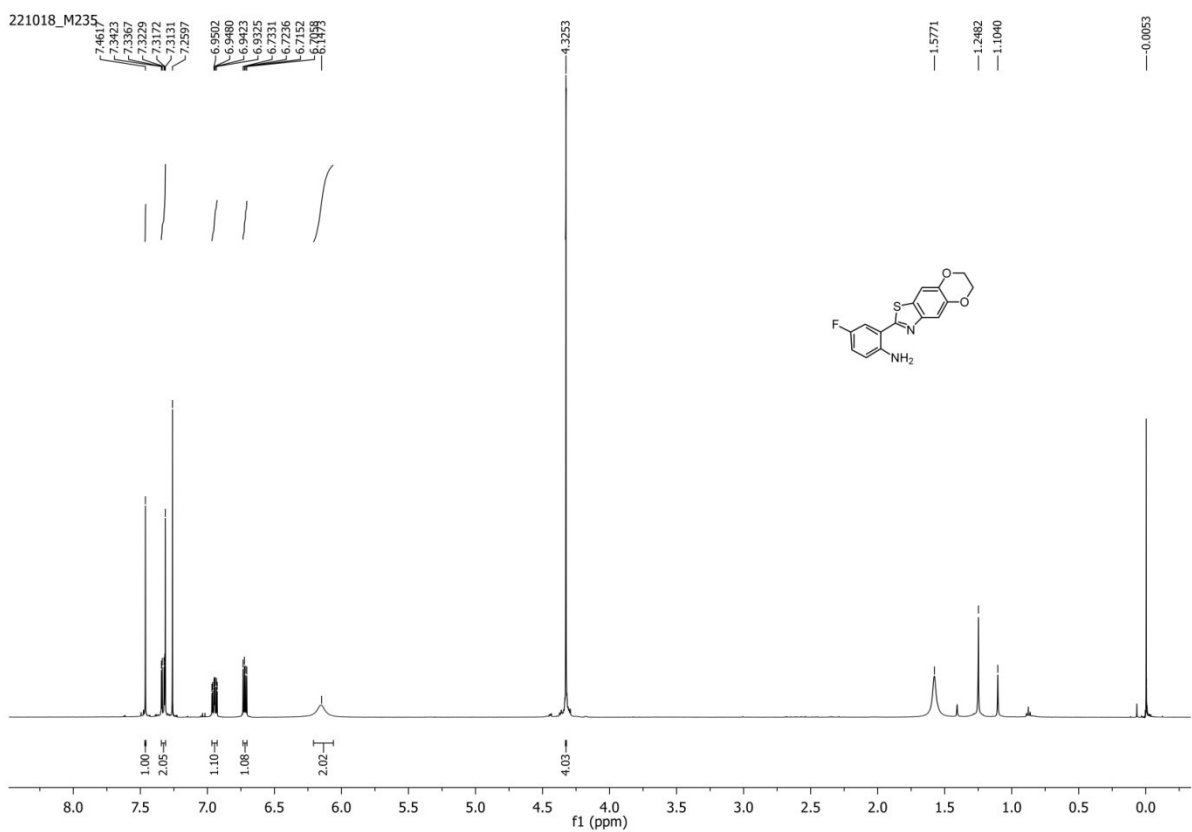

Figure S32.  $^1\text{H-NMR}$  spectrum of **3D** in  $\text{CDCl}_3$ .

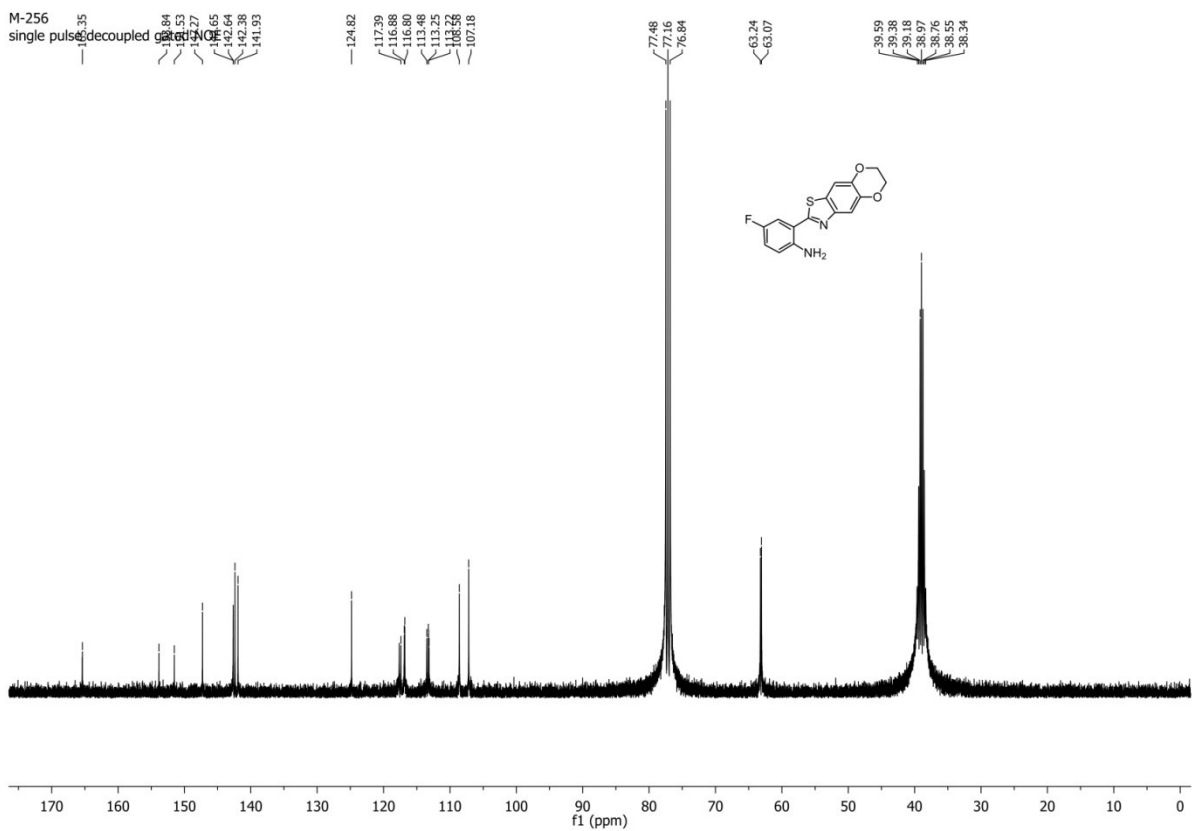

Figure S33.  $^{13}\text{C-NMR}$  spectrum of **3D** in  $\text{CDCl}_3 + \text{DMSO-d}_6$ .

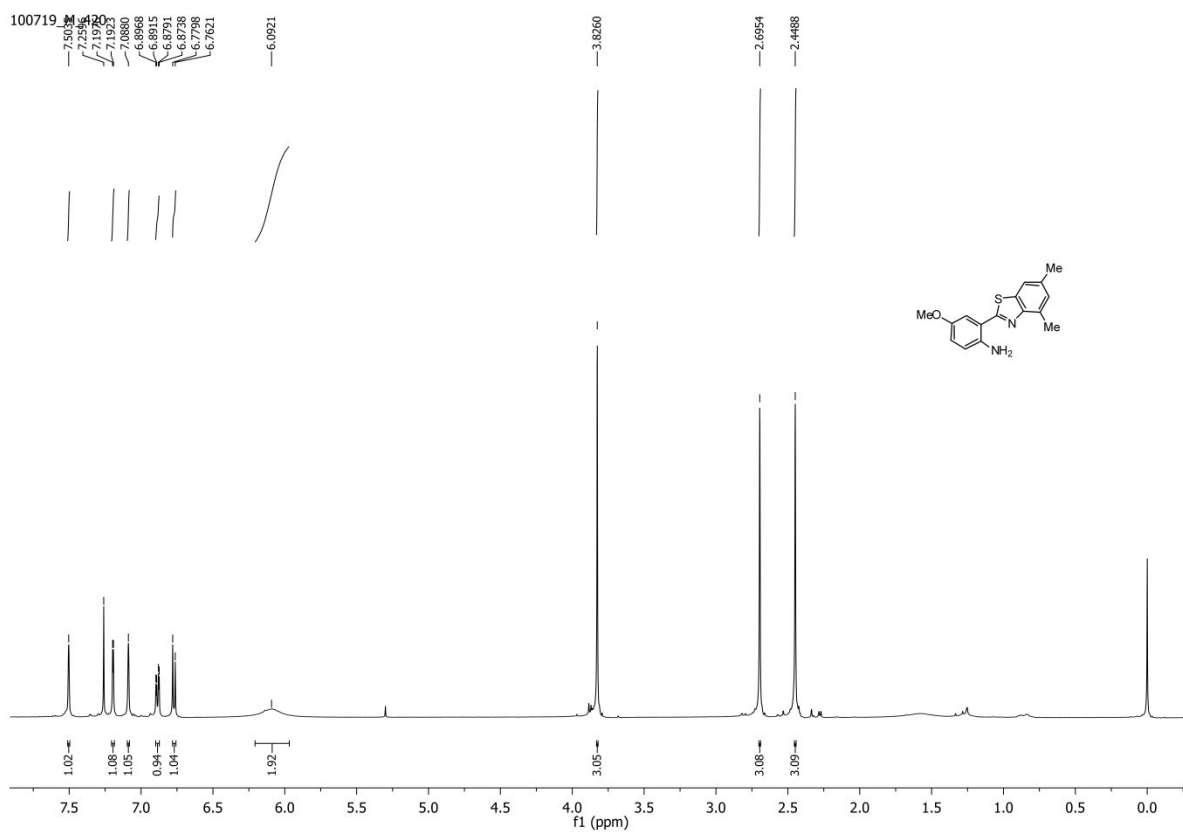

**Figure S34.** <sup>1</sup>H-NMR spectrum of **5B** in CDCl<sub>3</sub>.

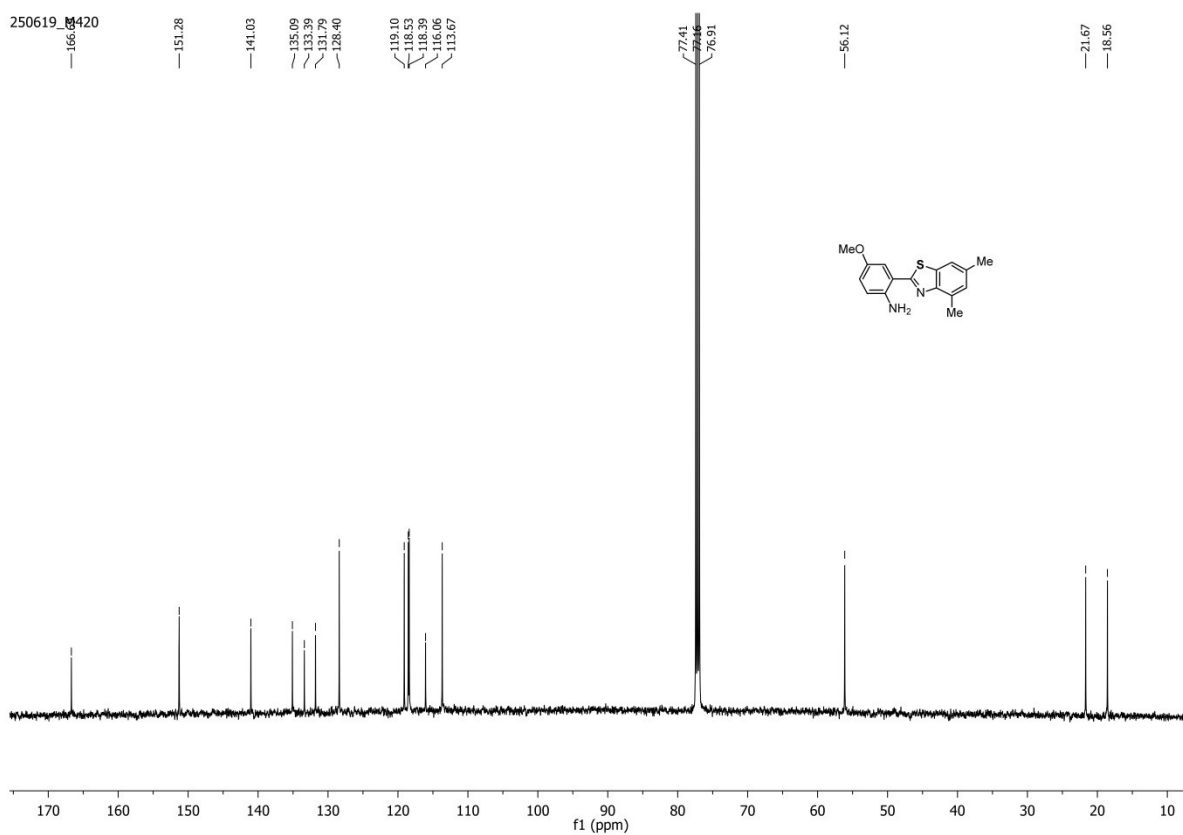

**Figure S35.** <sup>13</sup>C-NMR spectrum of **5B** in CDCl<sub>3</sub>.



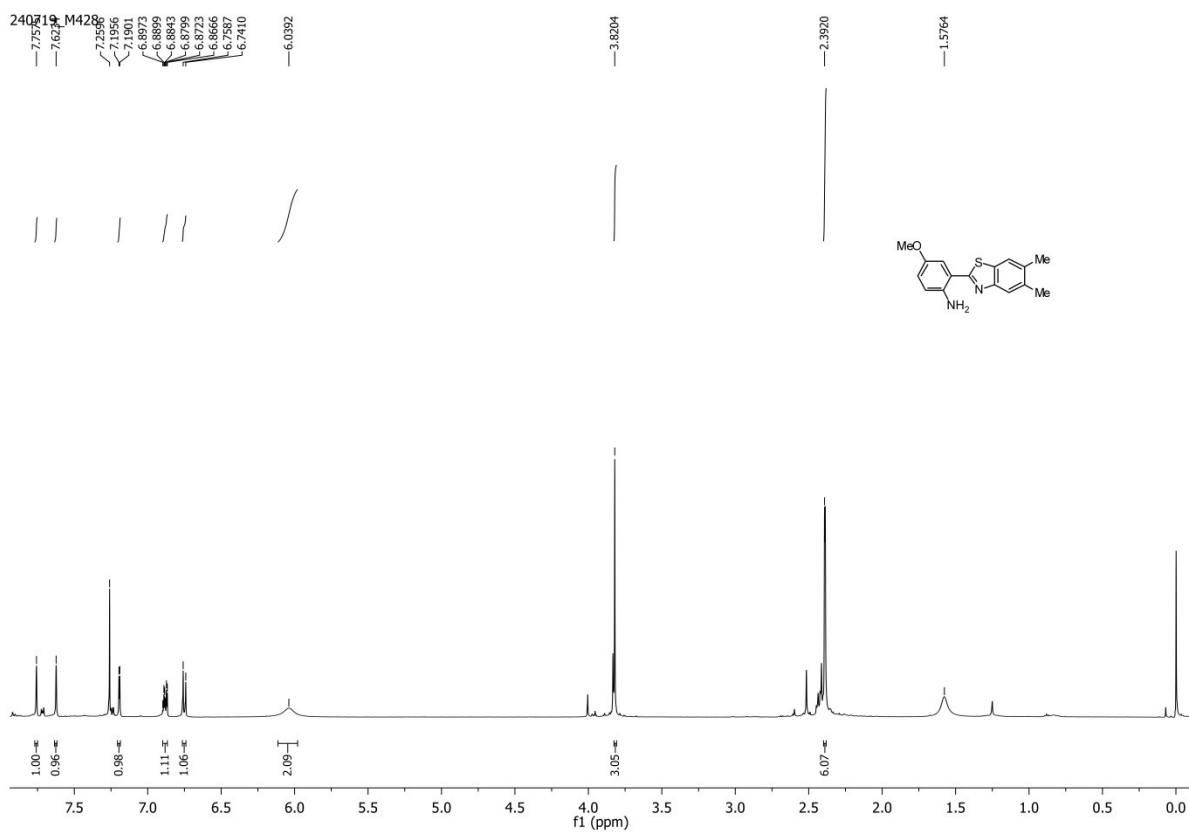

Figure S36. <sup>1</sup>H-NMR spectrum of **5C** in CDCl<sub>3</sub>

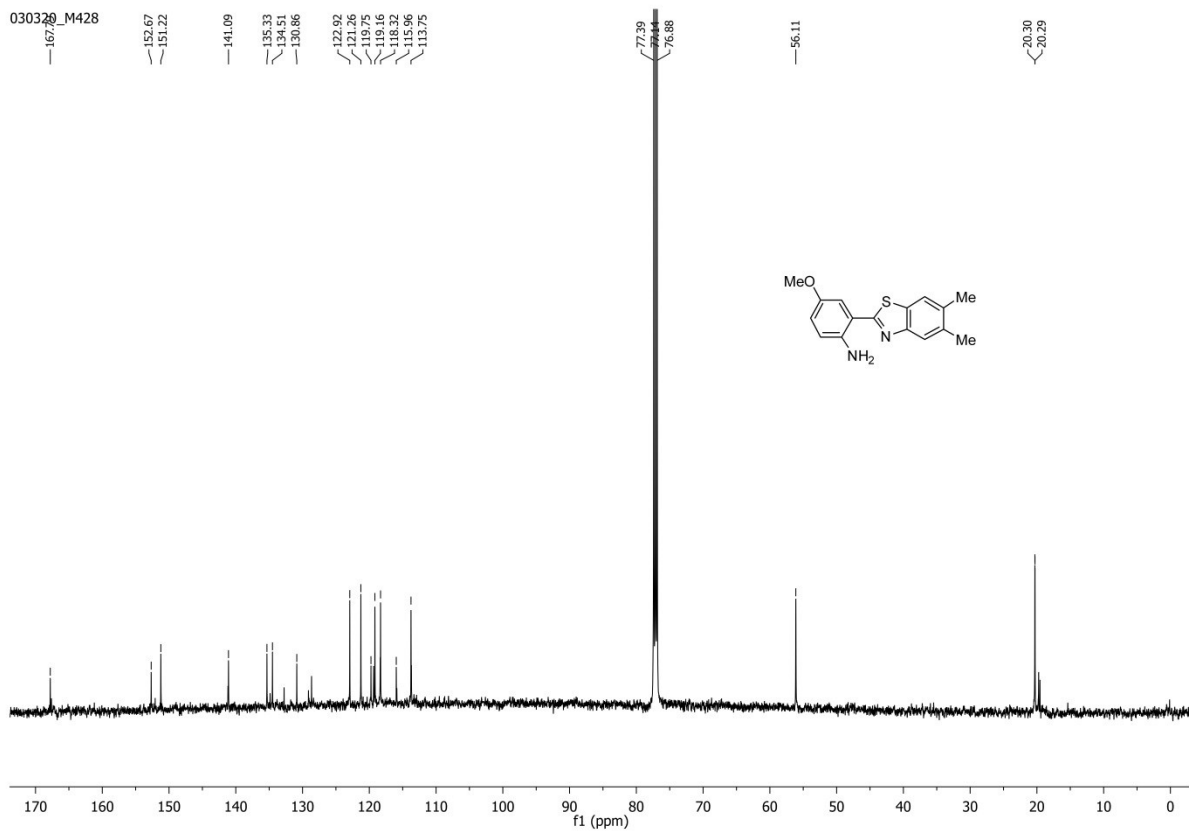

Figure S37. <sup>13</sup>C-NMR spectrum of **5C** in CDCl<sub>3</sub>

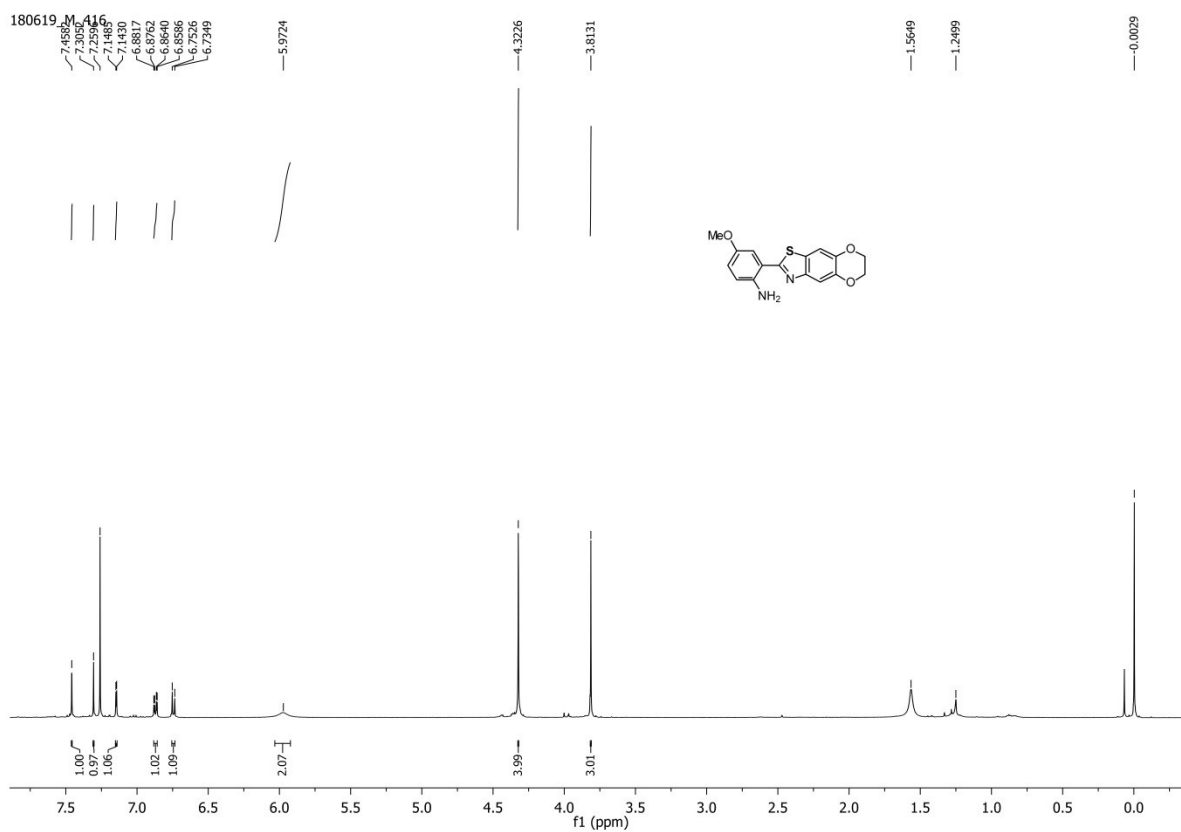

Figure S38. <sup>1</sup>H-NMR spectrum of **5D** in CDCl<sub>3</sub>

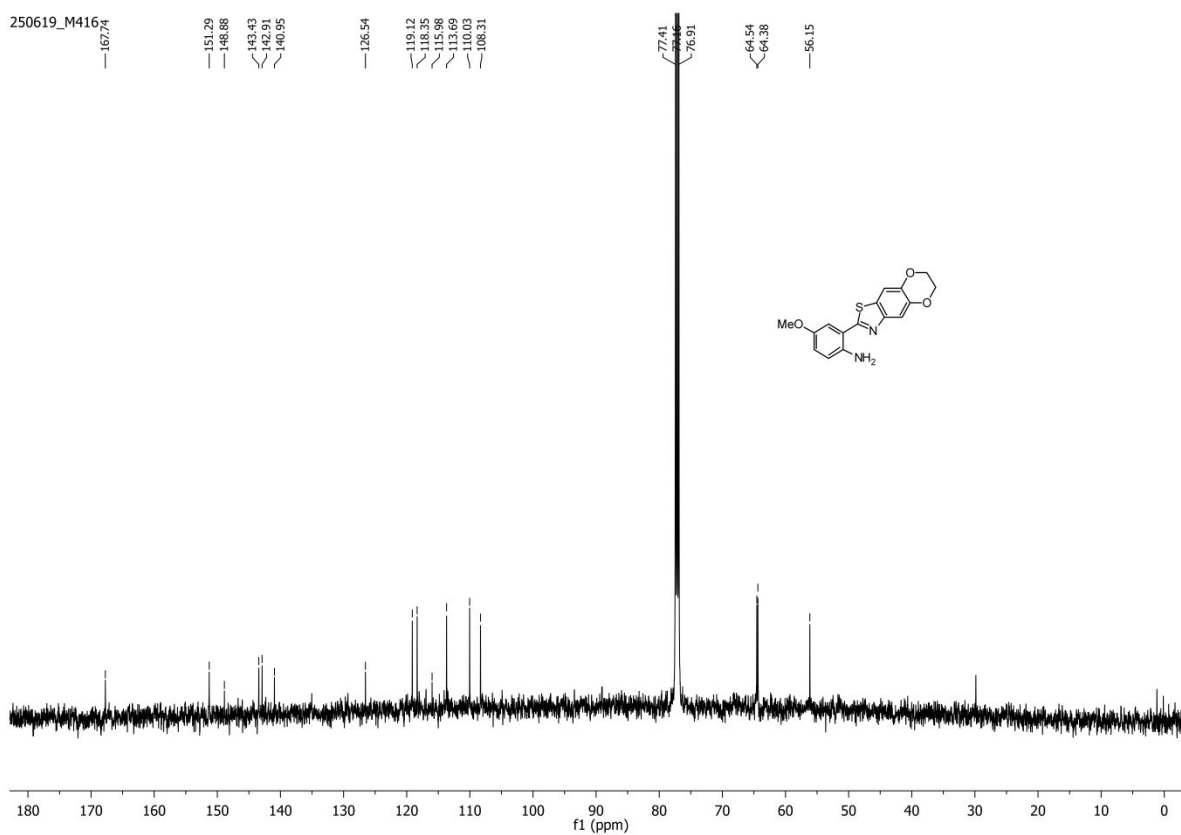

Figure S39. <sup>13</sup>C-NMR spectrum of **5D** in CDCl<sub>3</sub>

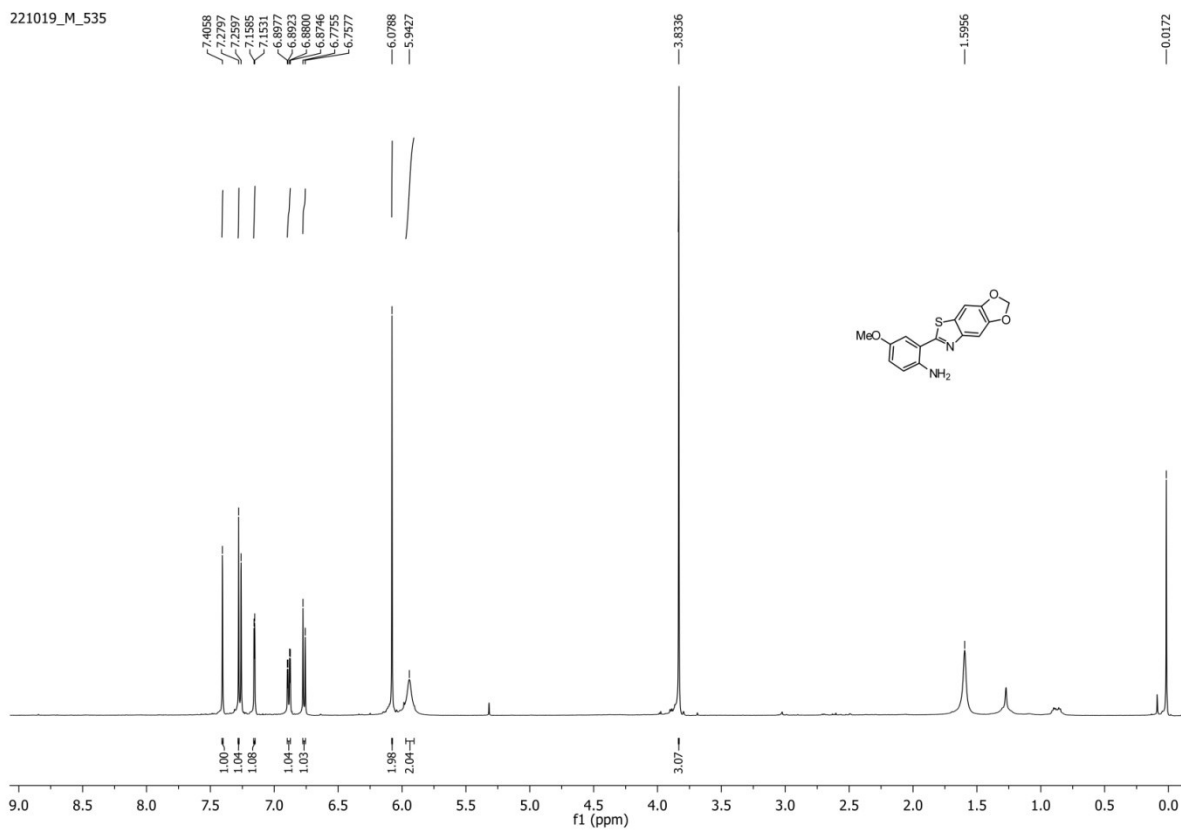

Figure S40.  $^1\text{H-NMR}$  spectrum of **5E** in  $\text{CDCl}_3$ .

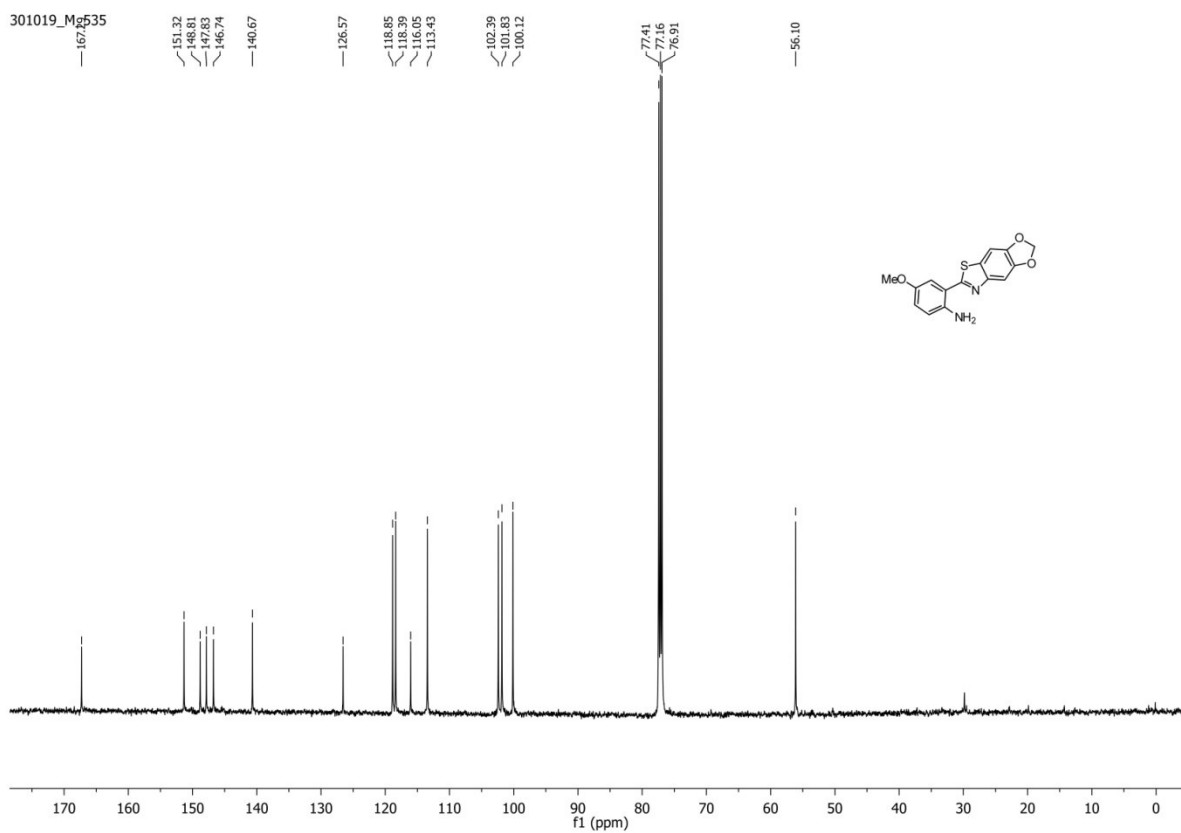

Figure S41.  $^{13}\text{C-NMR}$  spectrum of **5E** in  $\text{CDCl}_3$ .

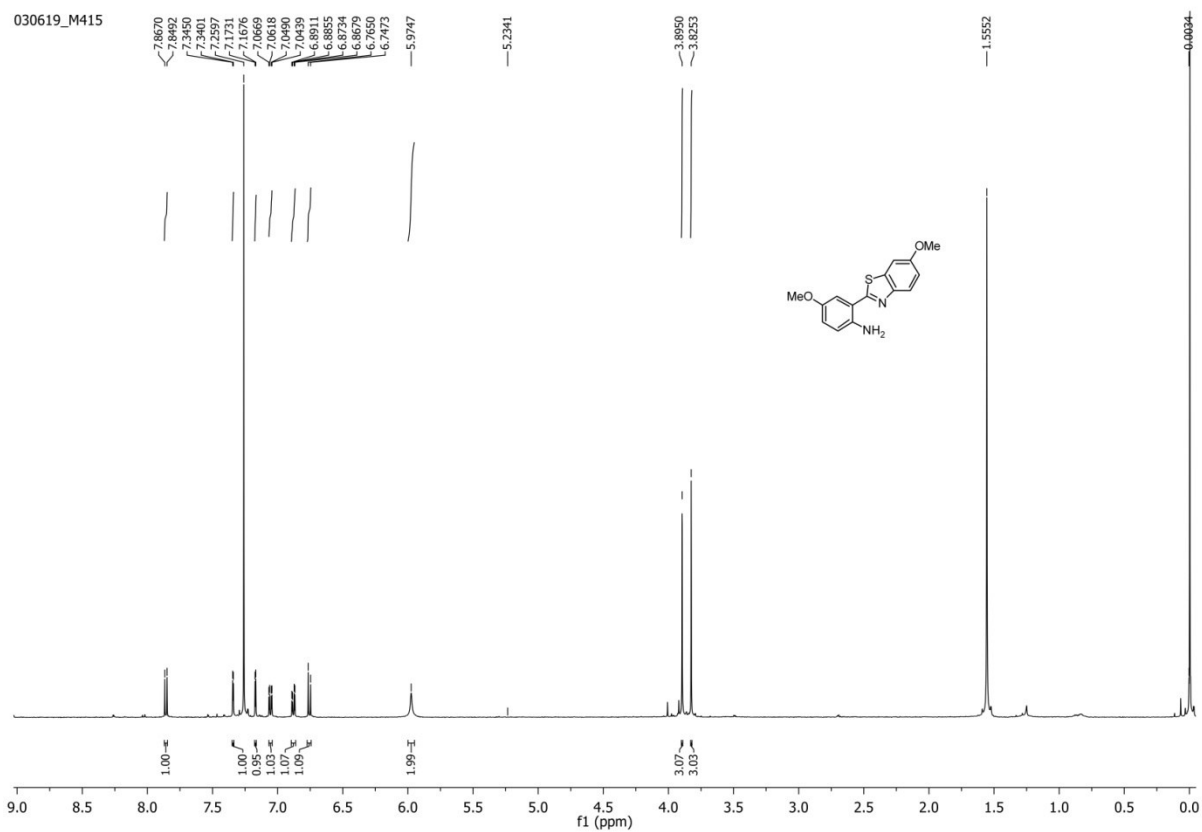

Figure S42.  $^1\text{H-NMR}$  spectrum of **5F** in  $\text{CDCl}_3$ .

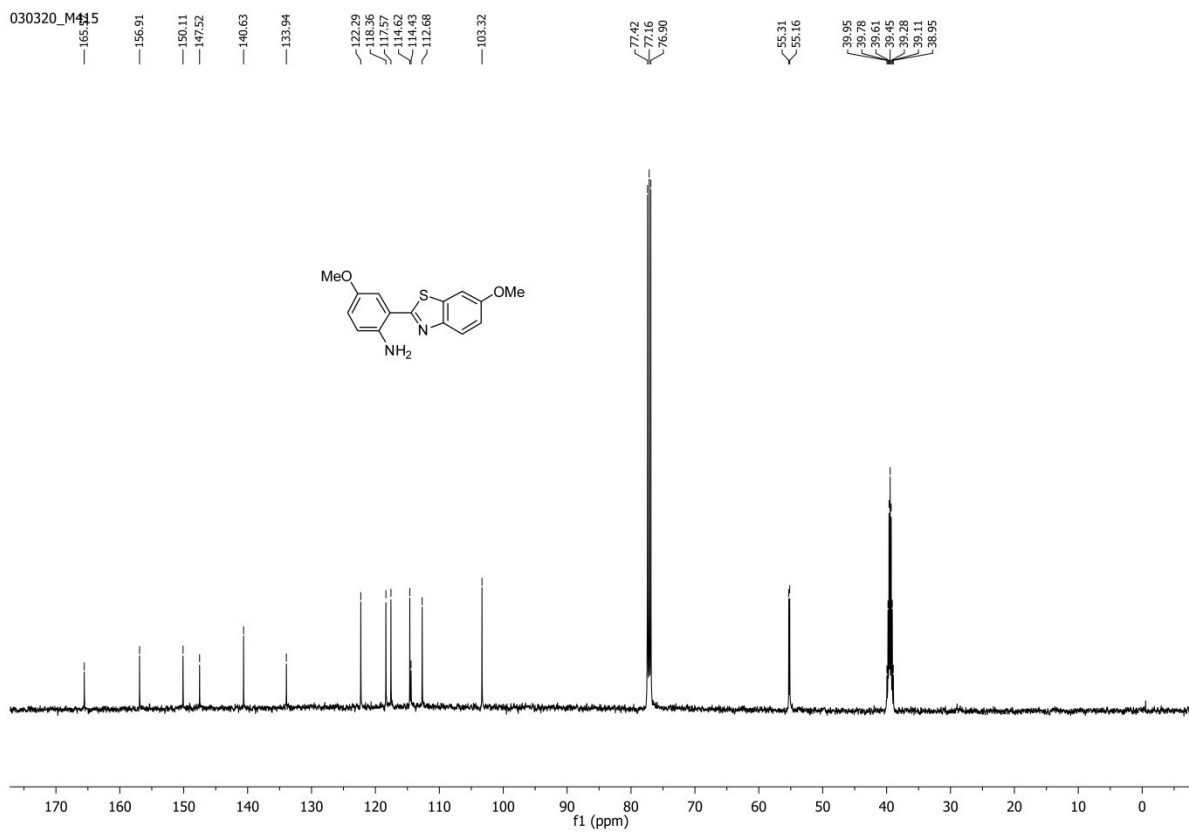

Figure S43.  $^{13}\text{C-NMR}$  spectrum of **5F** in a mixture of  $\text{CDCl}_3$  +  $\text{DMSO-d}_6$ .

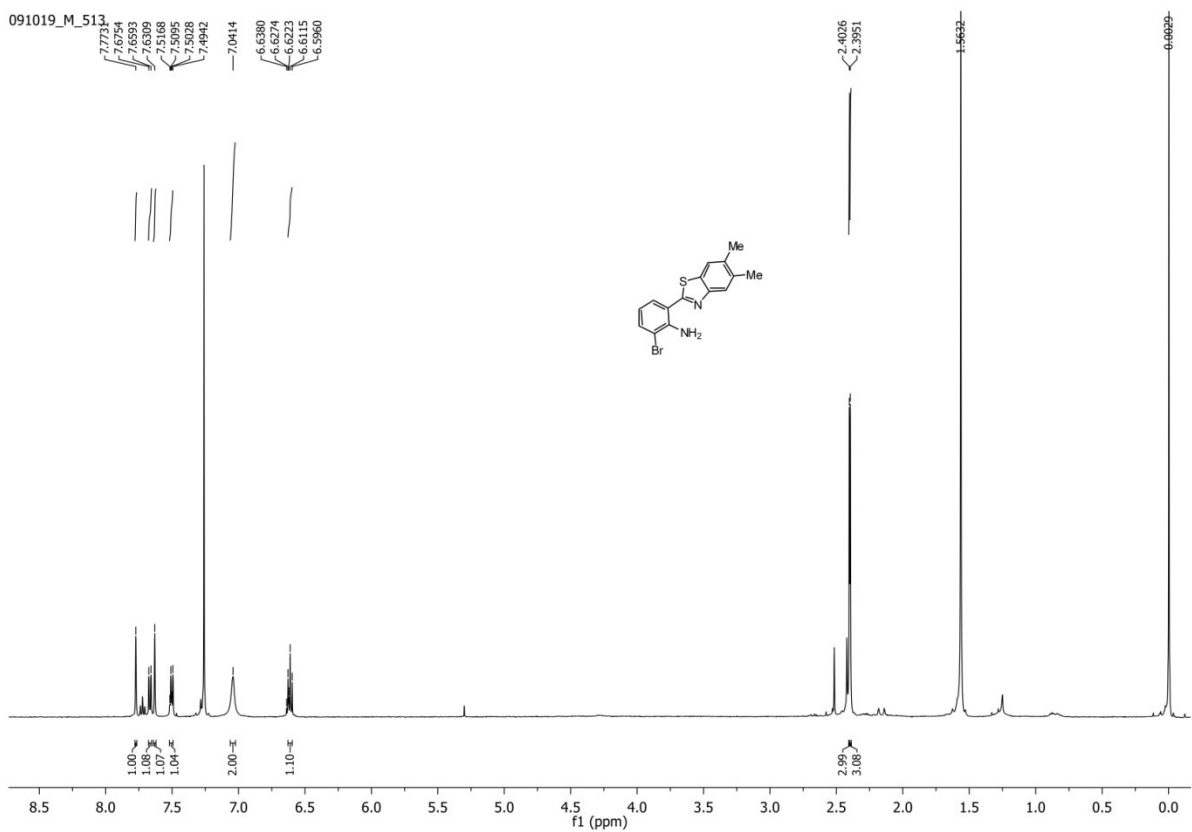

**Figure S44.**  $^1\text{H-NMR}$  spectrum of **7C** in  $\text{CDCl}_3$ .

It is mentioned that the  $^{13}\text{C-NMR}$  spectrum of **7C** could not be recorded due to solubility problem in  $\text{CDCl}_3$  as well as  $\text{DMSO-}d_6$ .

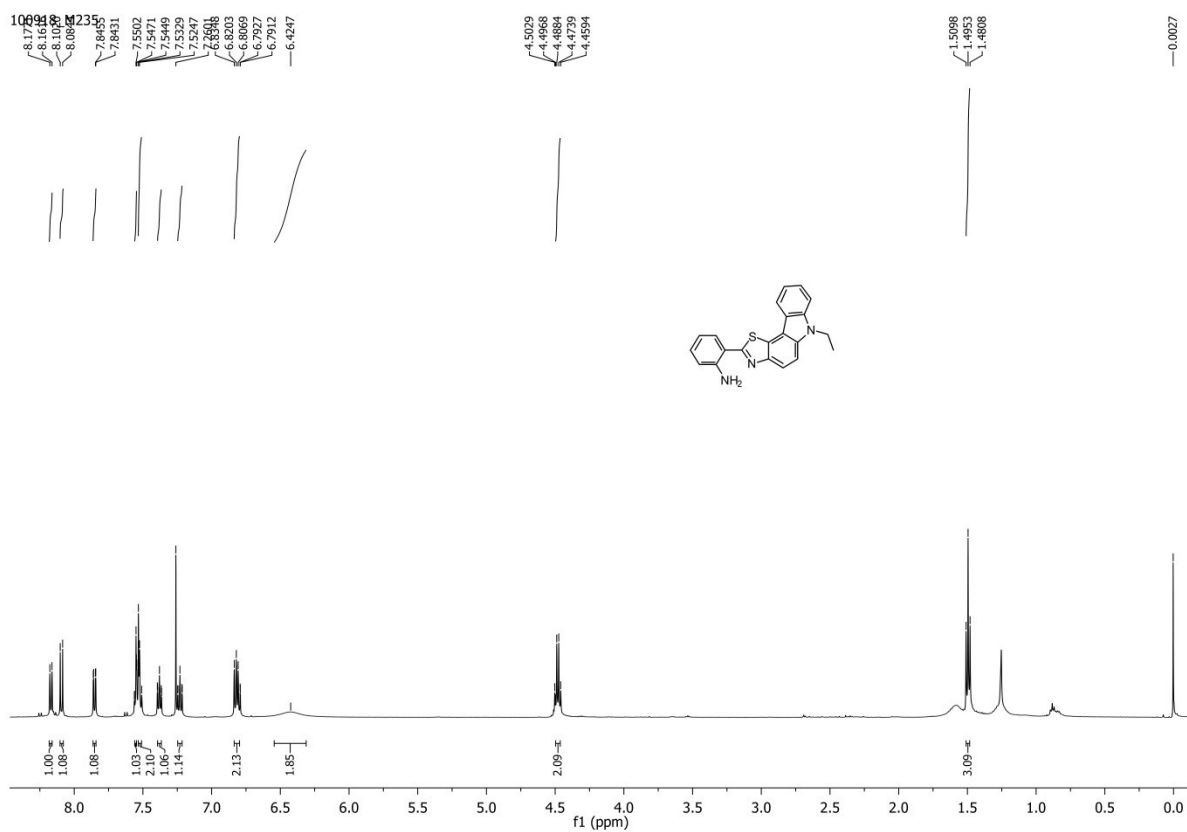

Figure S45. <sup>1</sup>H-NMR spectrum of **1J** in CDCl<sub>3</sub>.

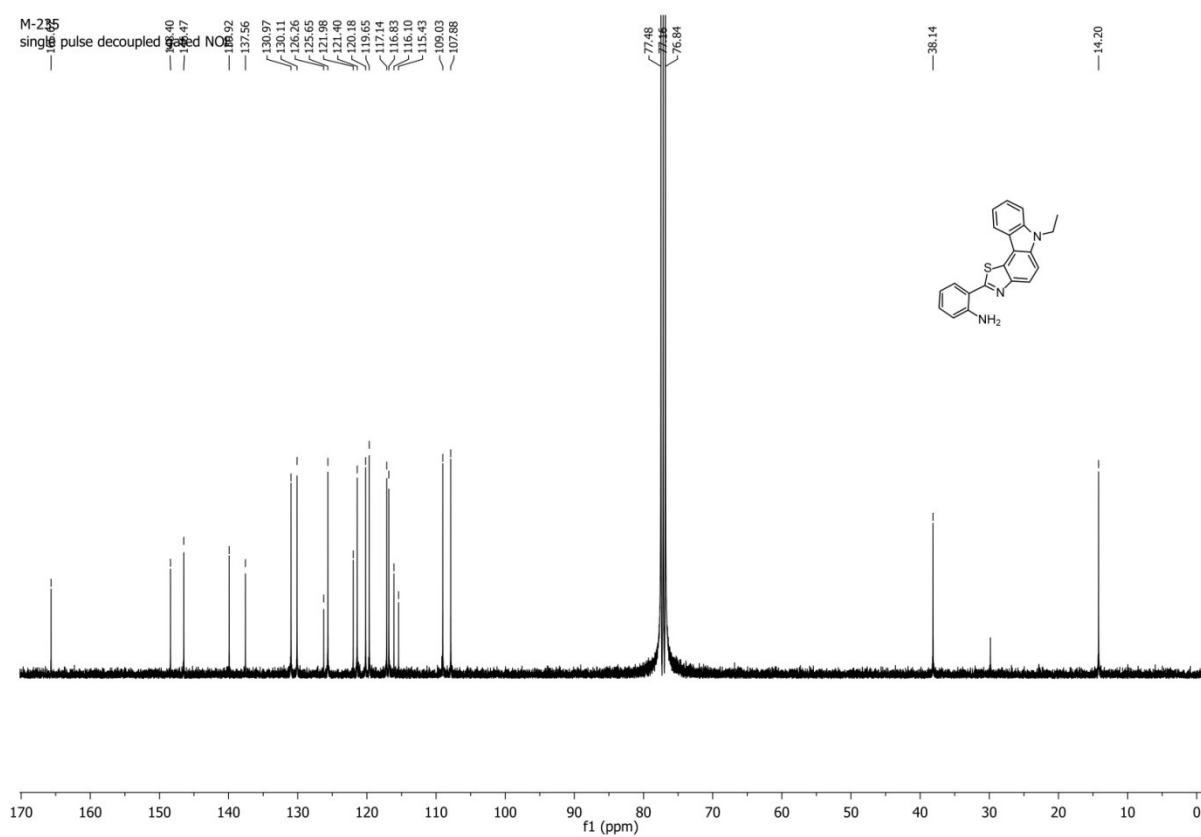

Figure S46. <sup>13</sup>C-NMR spectrum of **1J** in CDCl<sub>3</sub>.

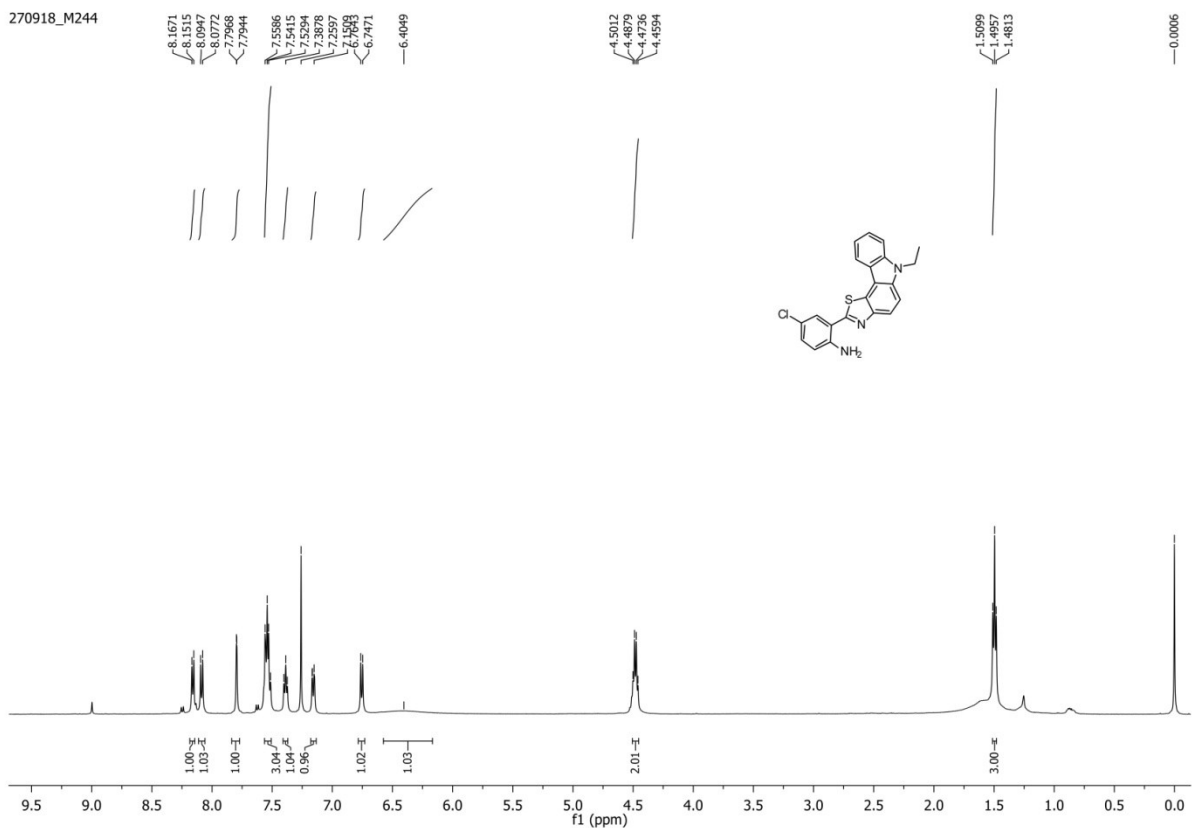

Figure S47.  $^1\text{H-NMR}$  spectrum of **2J** in  $\text{CDCl}_3$ .

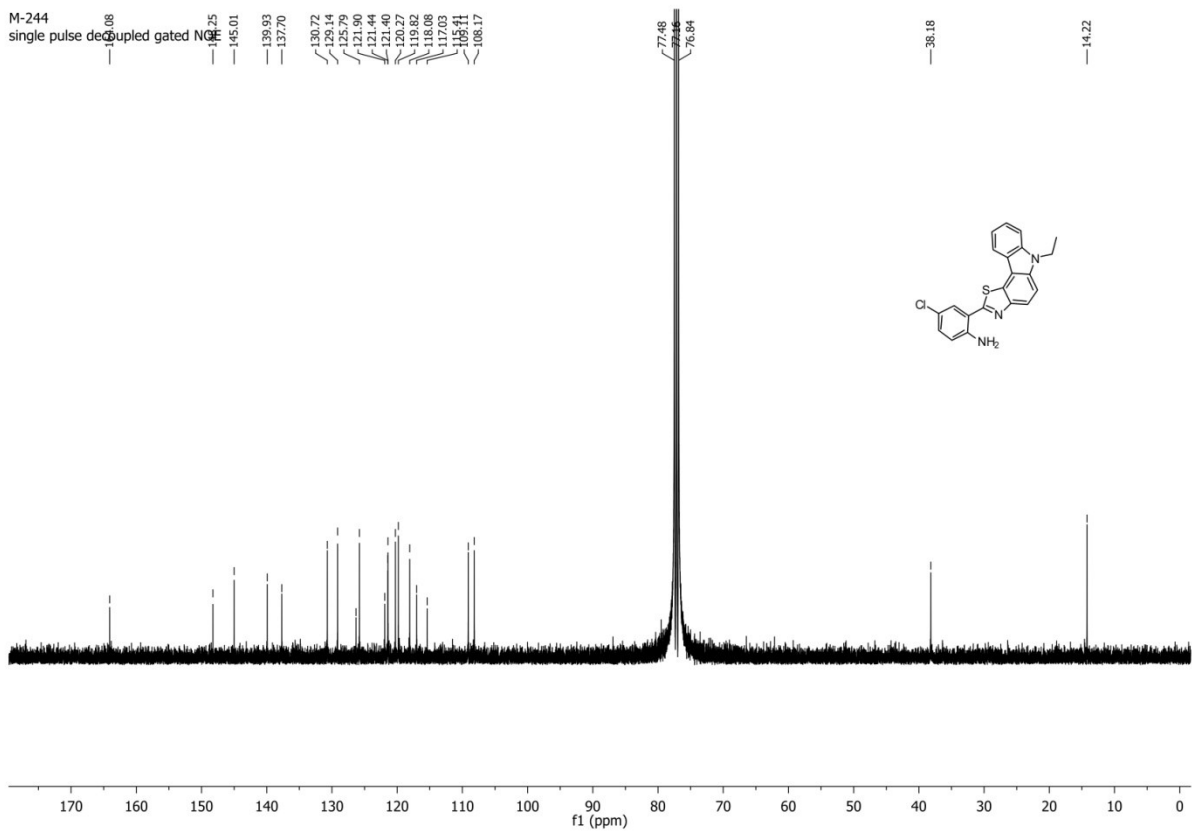

Figure S48.  $^{13}\text{C-NMR}$  spectrum of **2J** in  $\text{CDCl}_3$ .

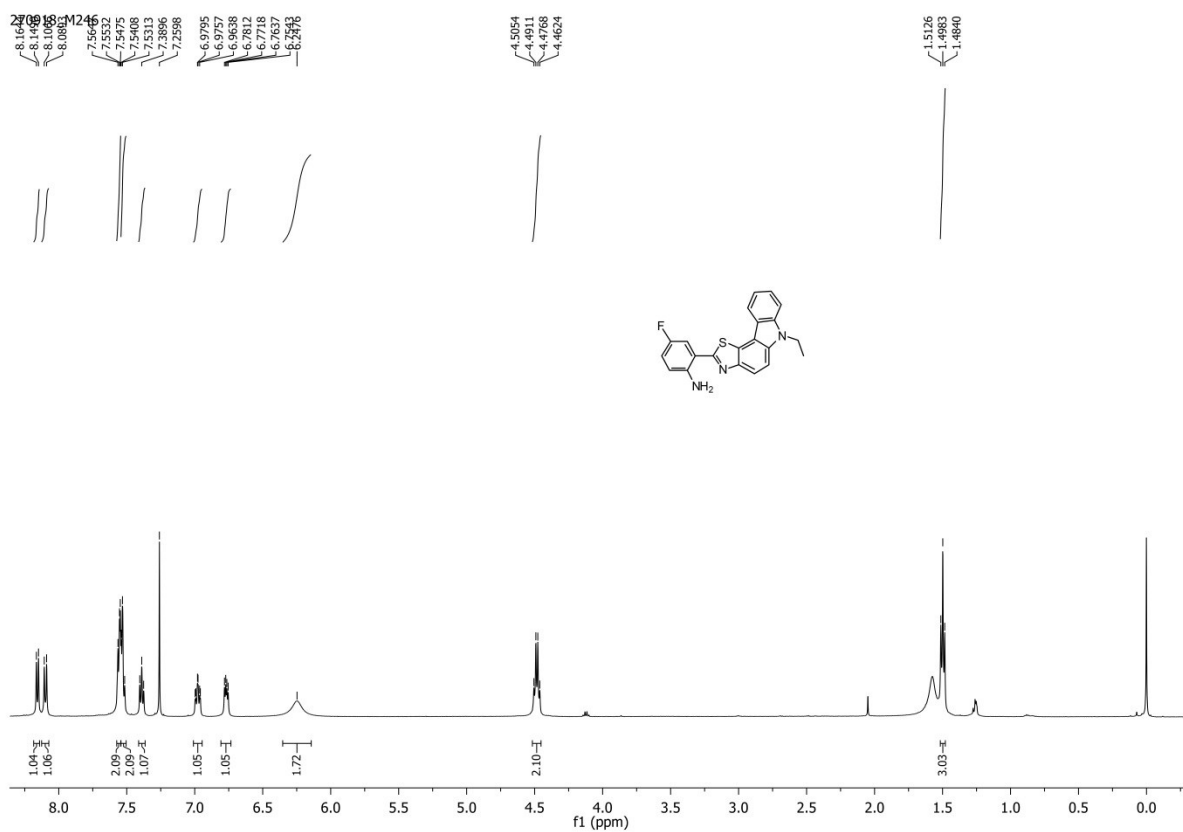

**Figure S49.**  $^1\text{H-NMR}$  spectrum of **3J** in  $\text{CDCl}_3$ .

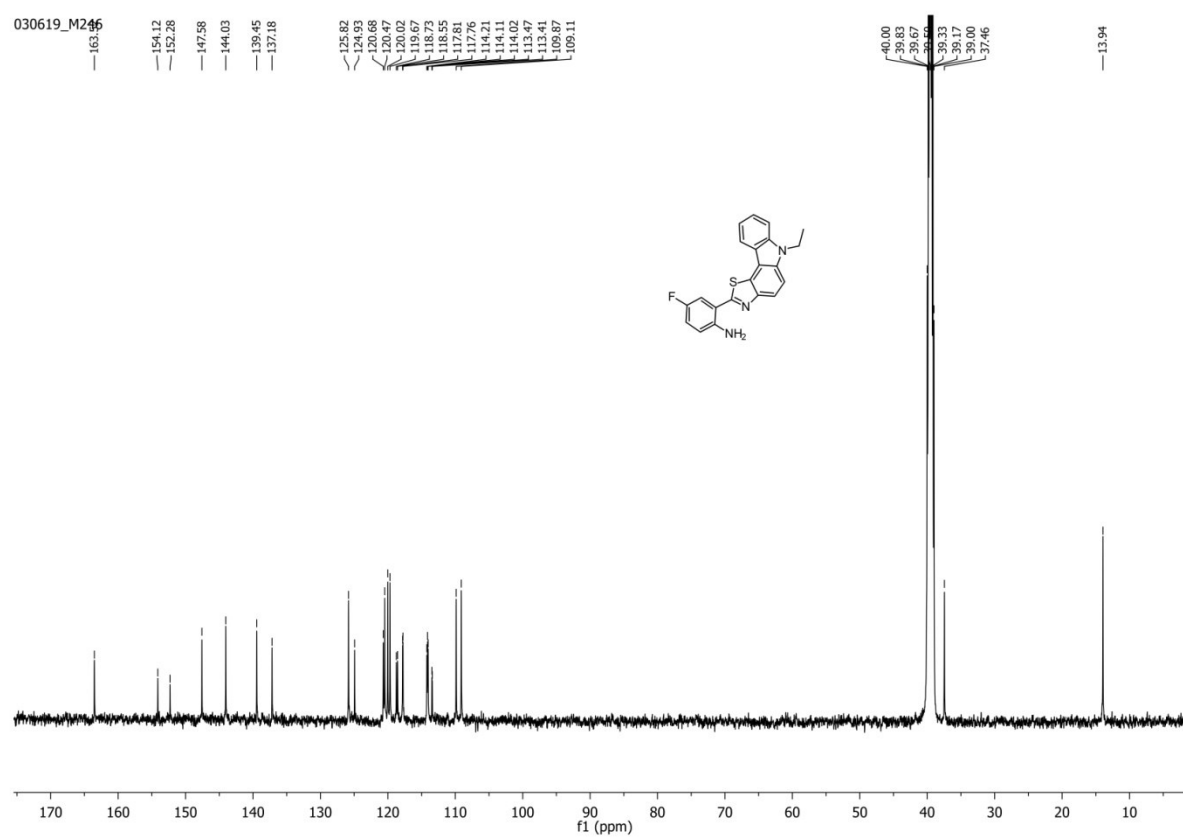

**Figure S50.**  $^{13}\text{C-NMR}$  spectrum of **3J** in  $\text{DMSO-d}_6$ .



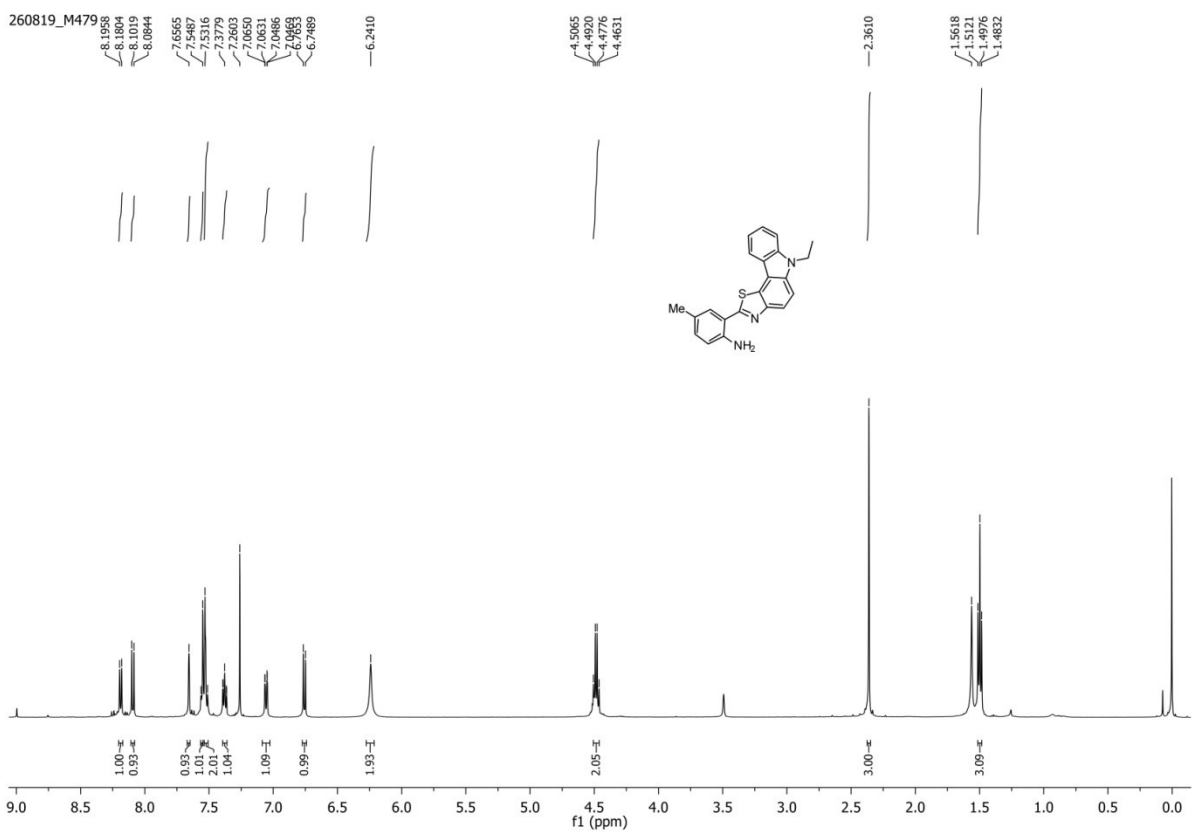

Figure S51.  $^1\text{H-NMR}$  spectrum of **4J** in  $\text{CDCl}_3$ .

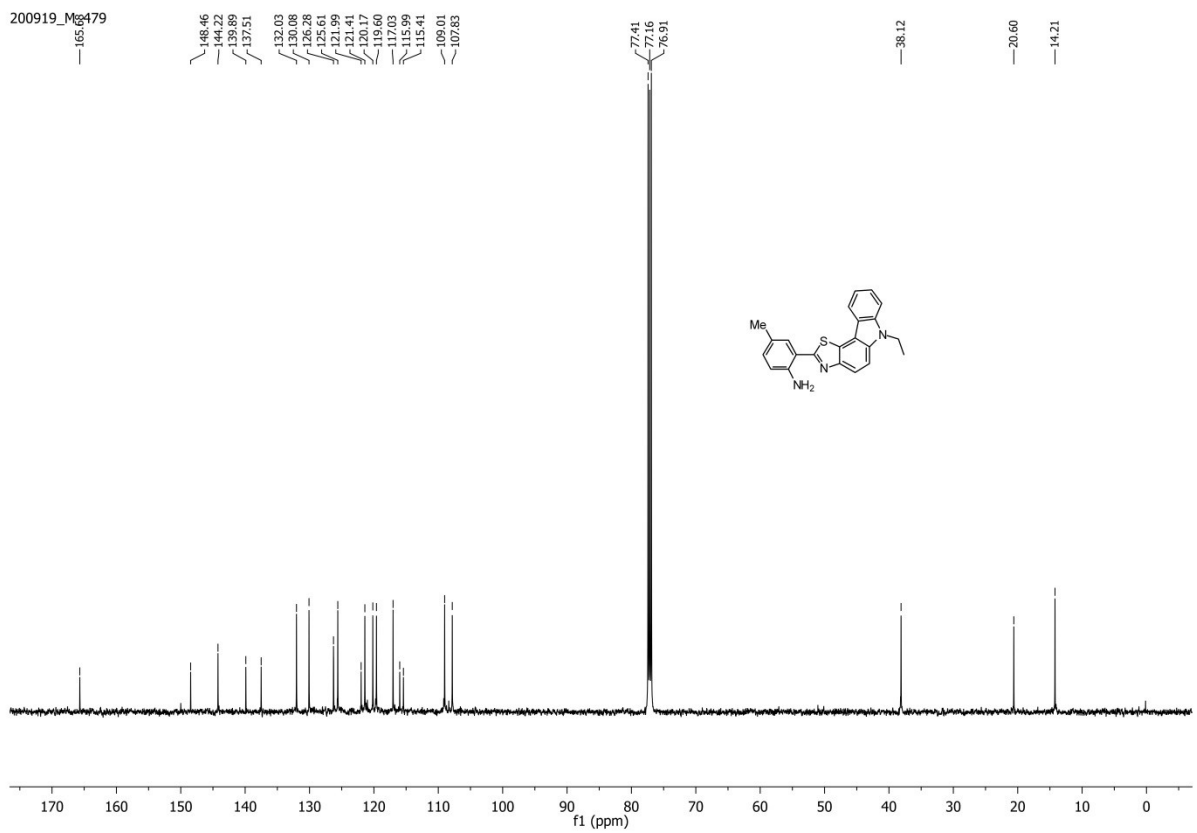

Figure S52.  $^{13}\text{C-NMR}$  spectrum of **4J** in  $\text{CDCl}_3$ .

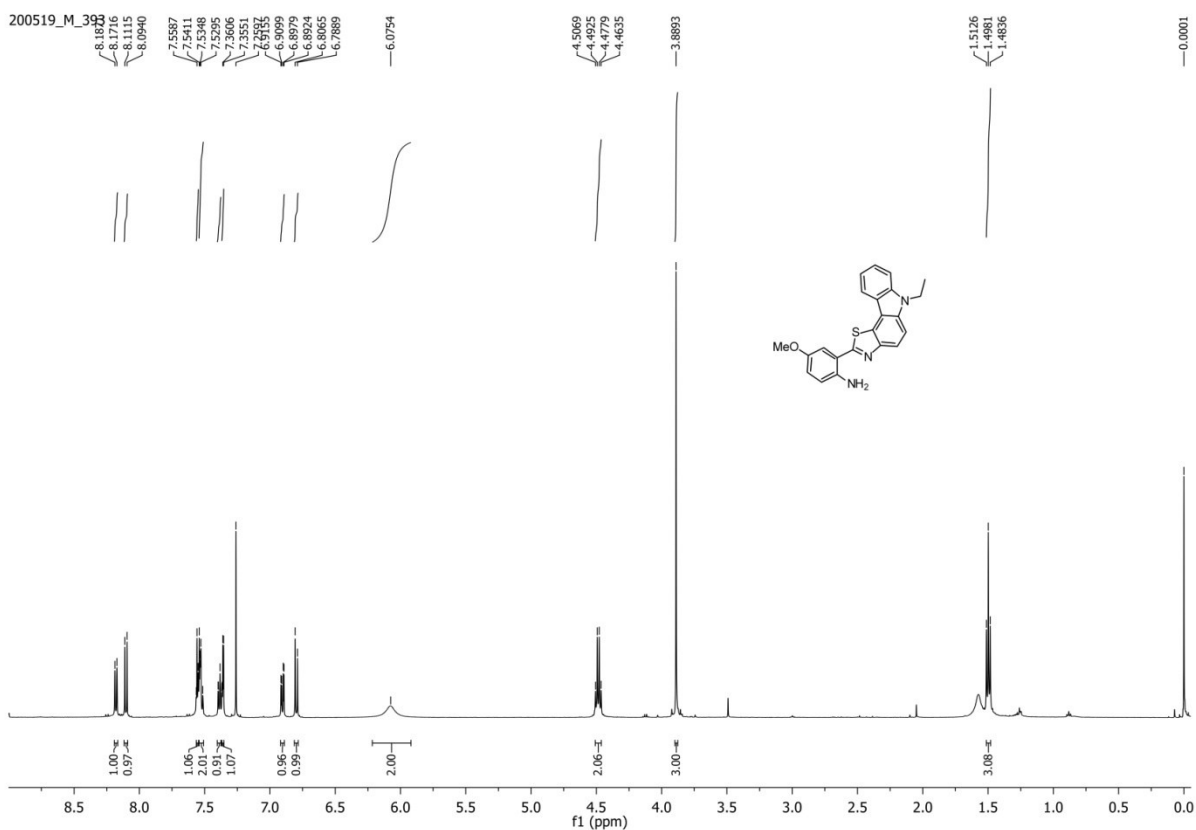

Figure S53. <sup>1</sup>H-NMR spectrum of **5J** in CDCl<sub>3</sub>.

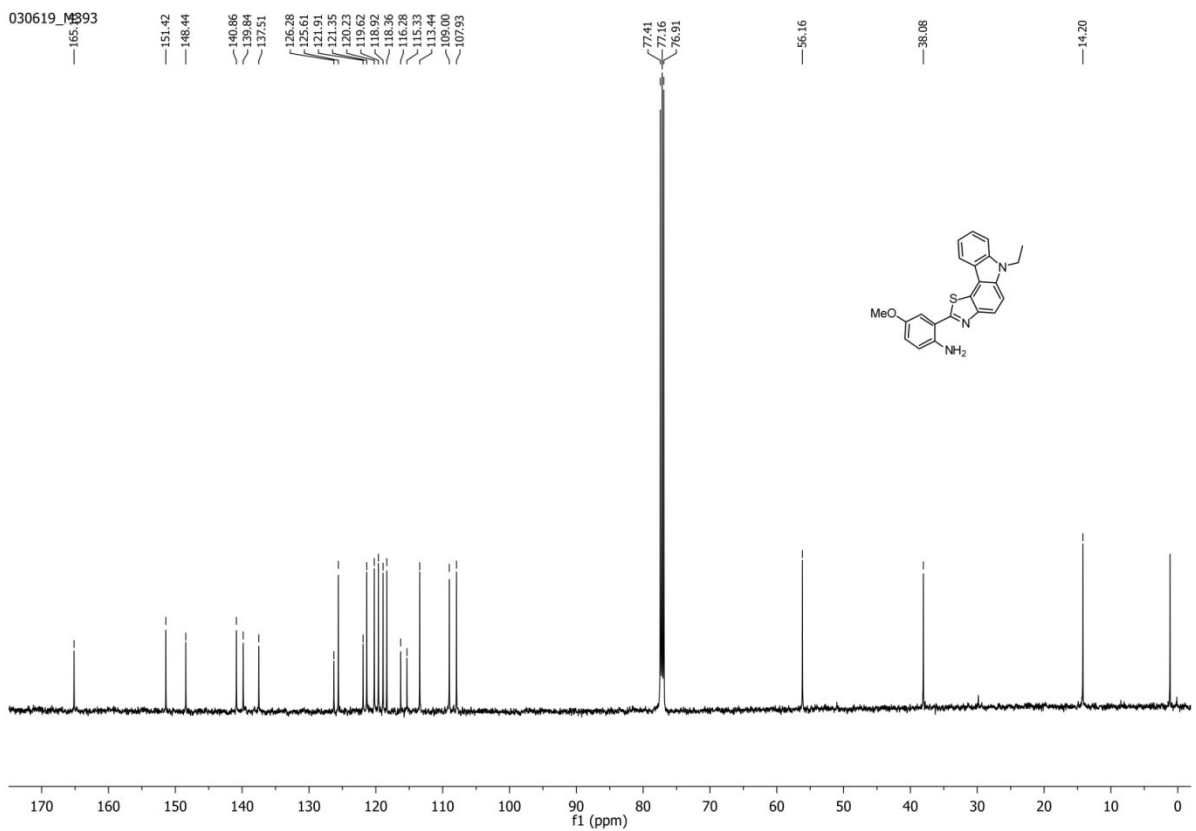

Figure S54. <sup>13</sup>C-NMR spectrum of **5J** in CDCl<sub>3</sub>.

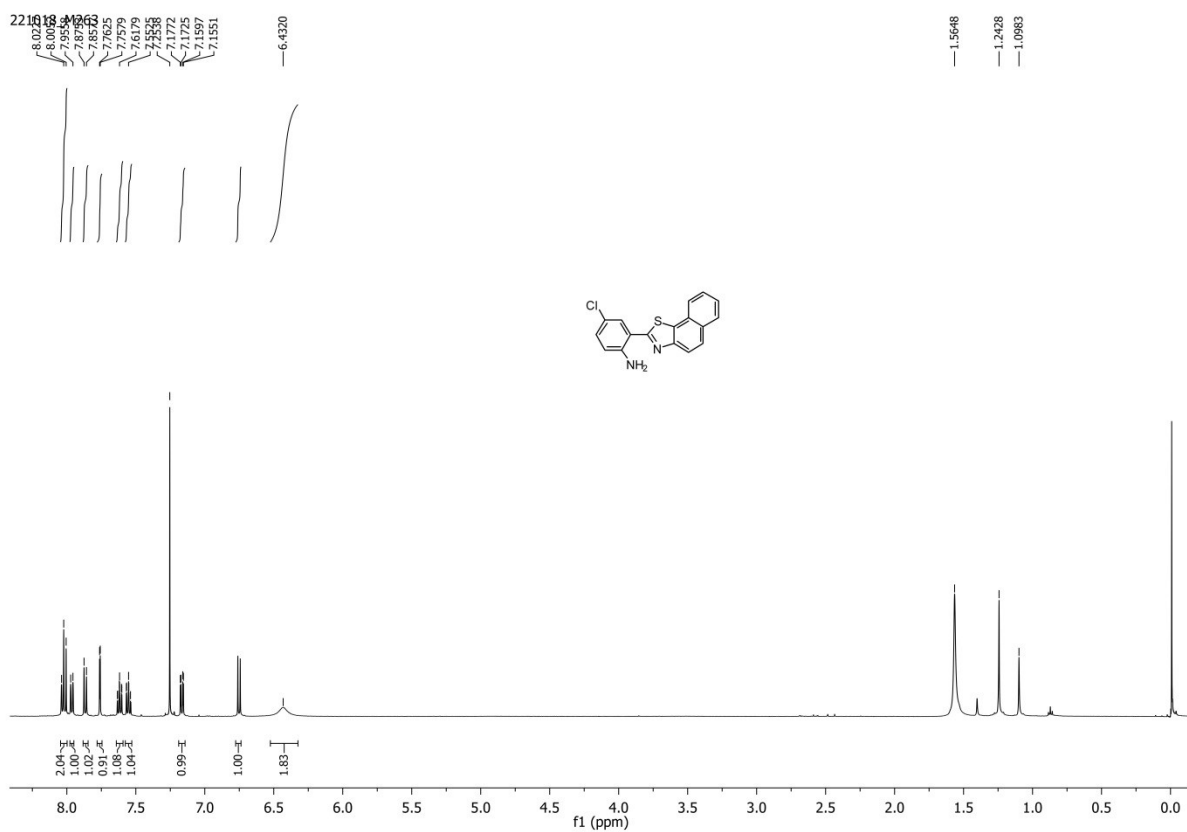

Figure S55. <sup>1</sup>H-NMR spectrum of 2K in CDCl<sub>3</sub>.

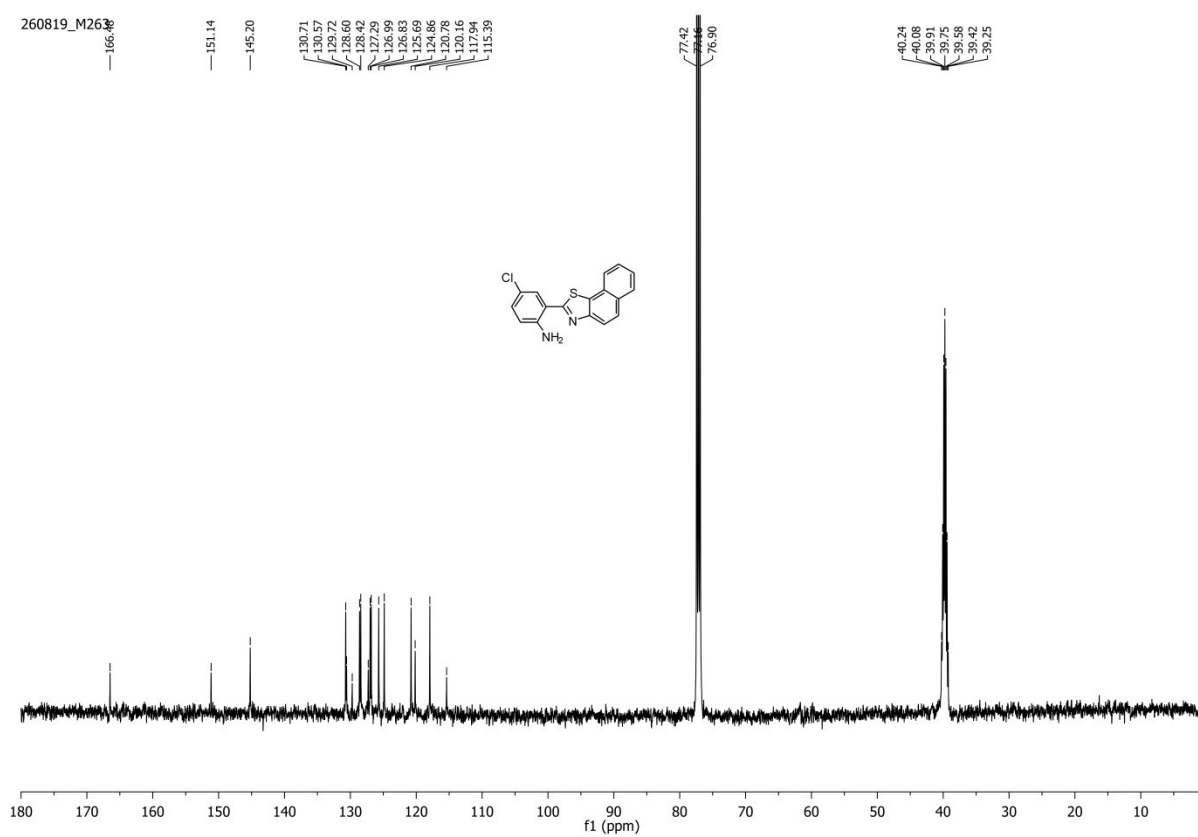

Figure S56. <sup>13</sup>C-NMR spectrum of 2K in a mixture of CDCl<sub>3</sub> + DMSO-d<sub>6</sub>.

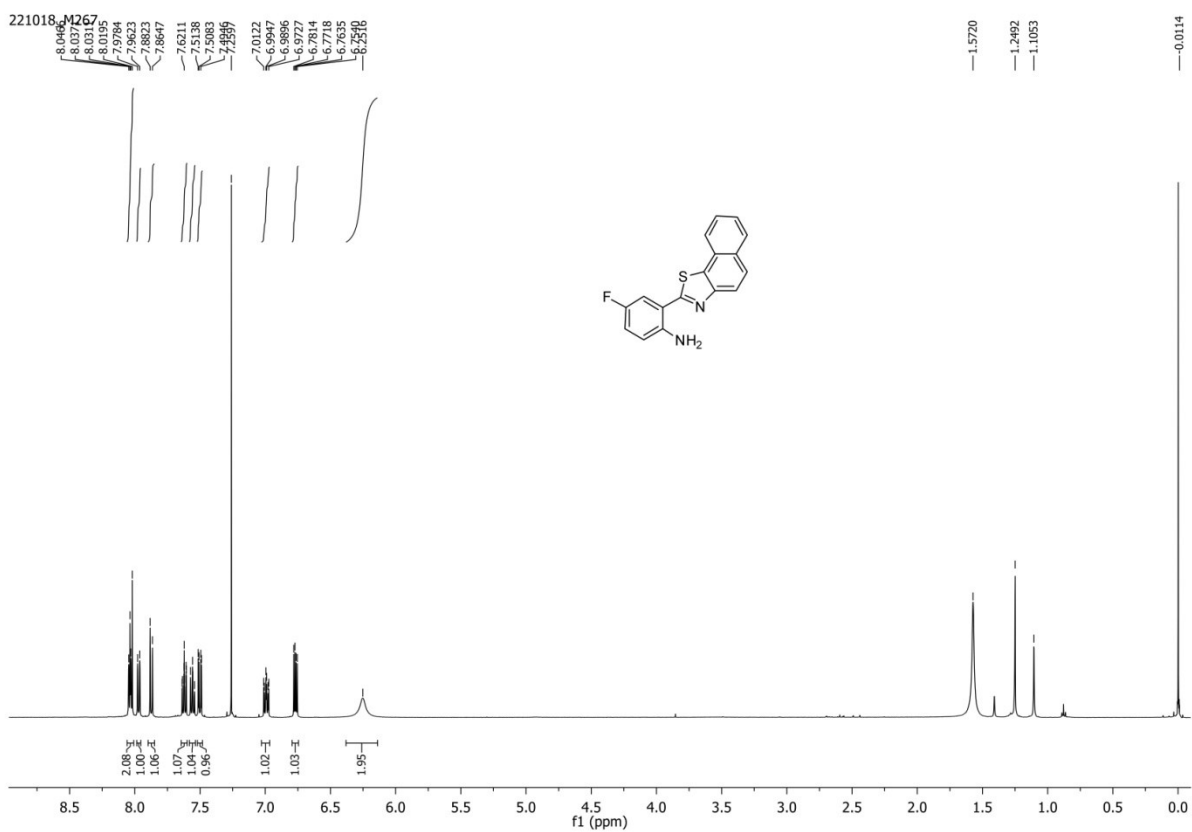

Figure S57.  $^1\text{H-NMR}$  spectrum of **3K** in  $\text{CDCl}_3$ .

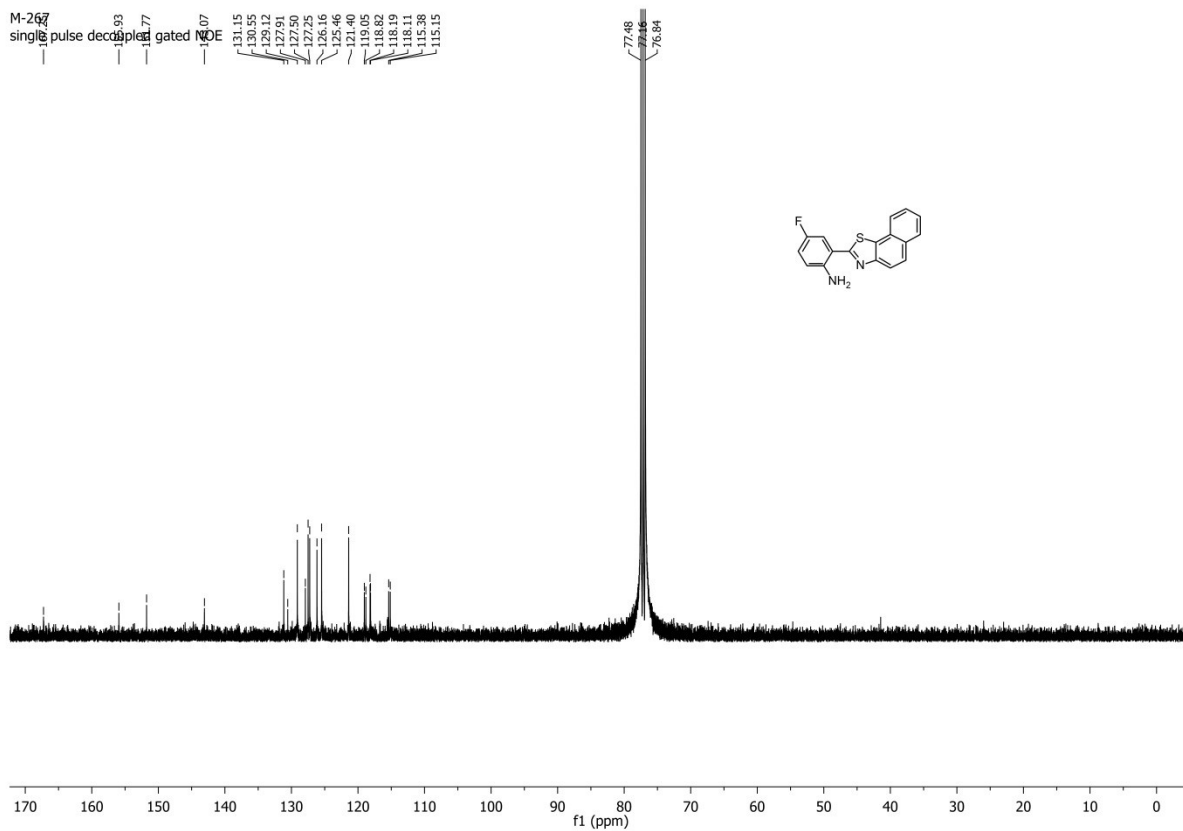

Figure S58.  $^{13}\text{C-NMR}$  spectrum of **3K** in  $\text{CDCl}_3$ .

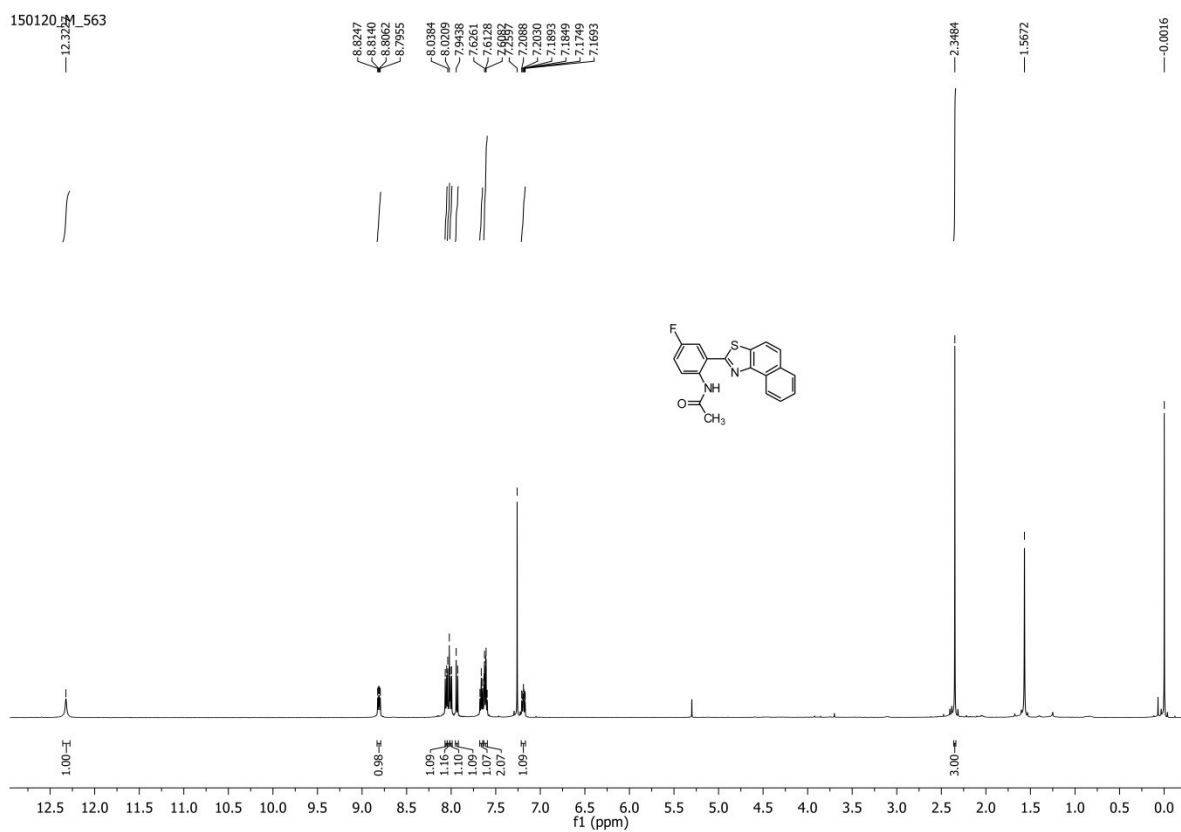

Figure S59.  $^1\text{H}$ -NMR spectrum of **8** in  $\text{CDCl}_3$ .

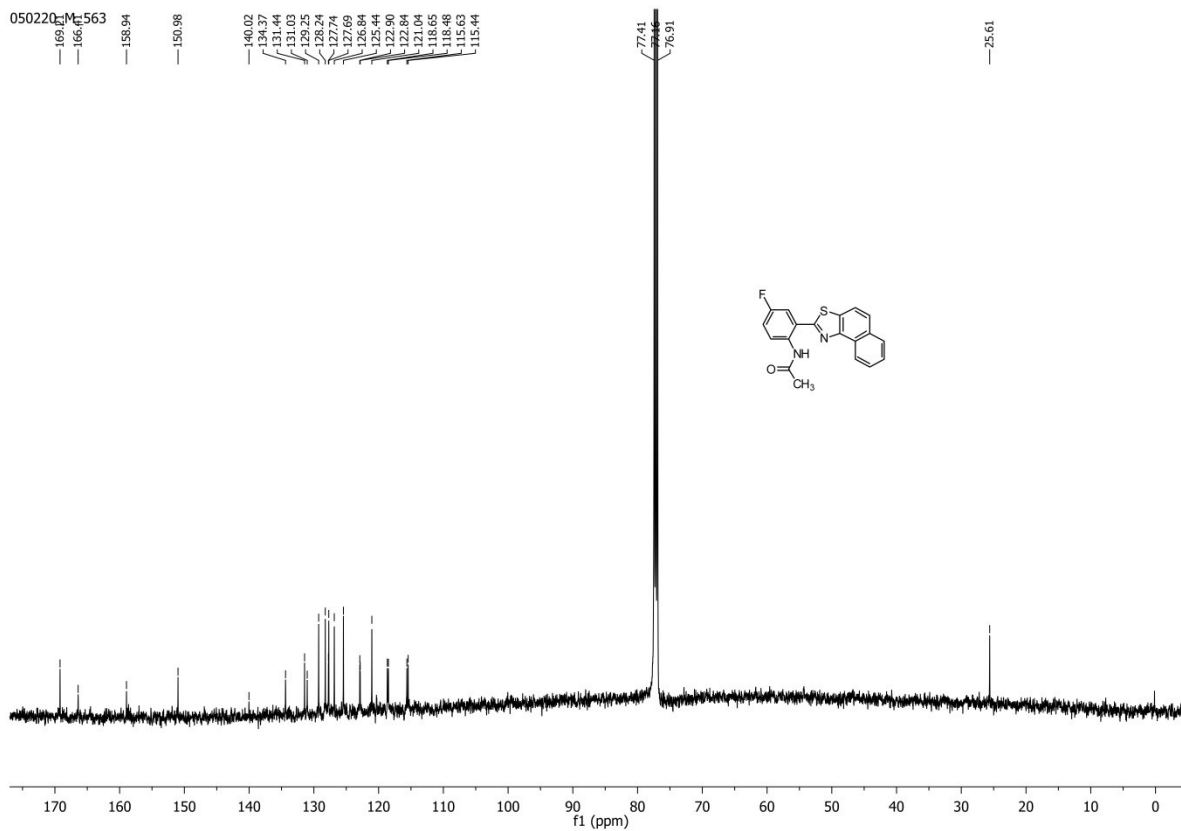

Figure S60.  $^{13}\text{C}$ -NMR spectrum of **8** in  $\text{CDCl}_3$ .

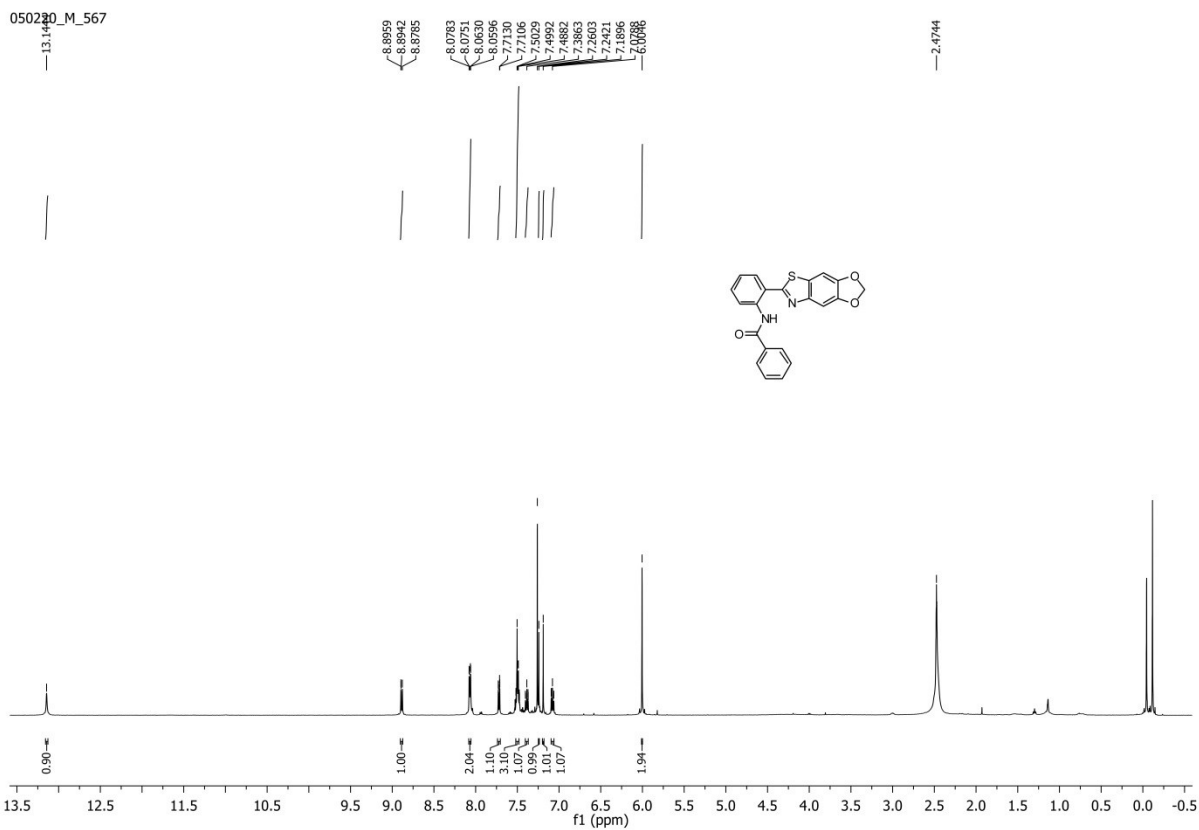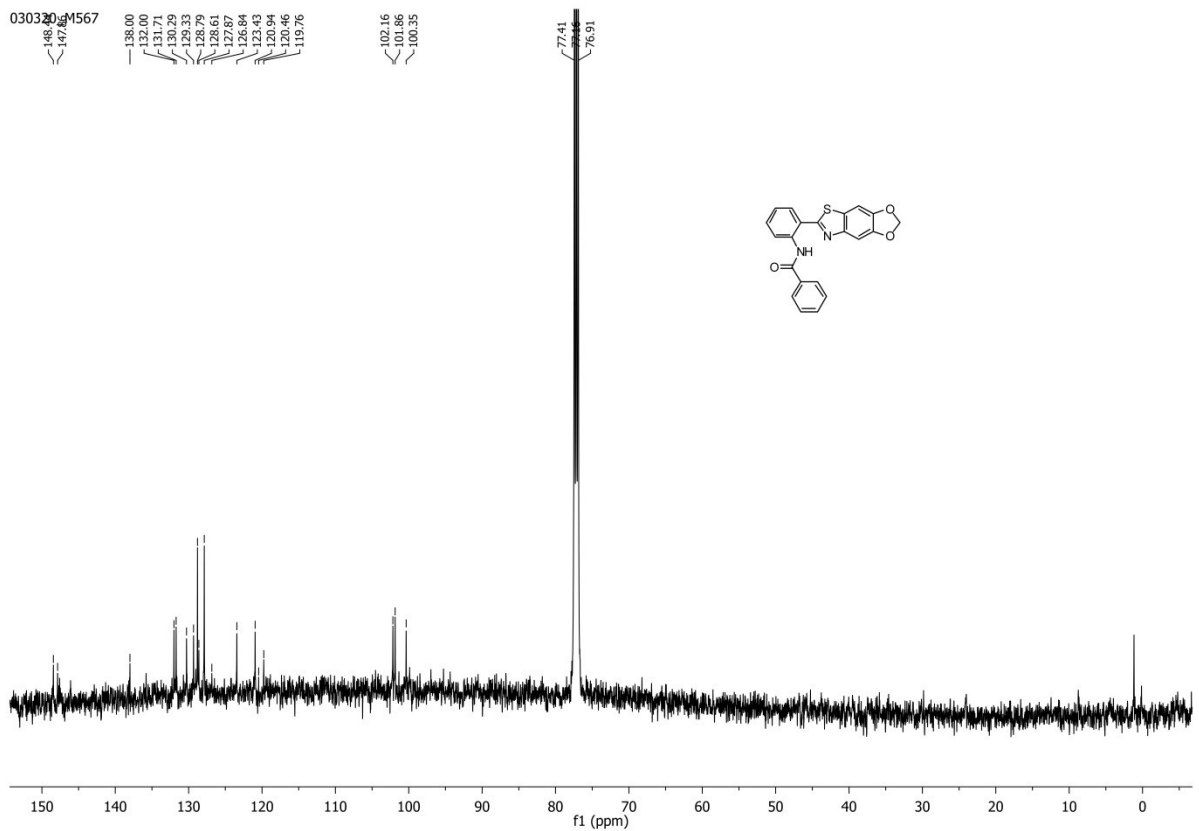

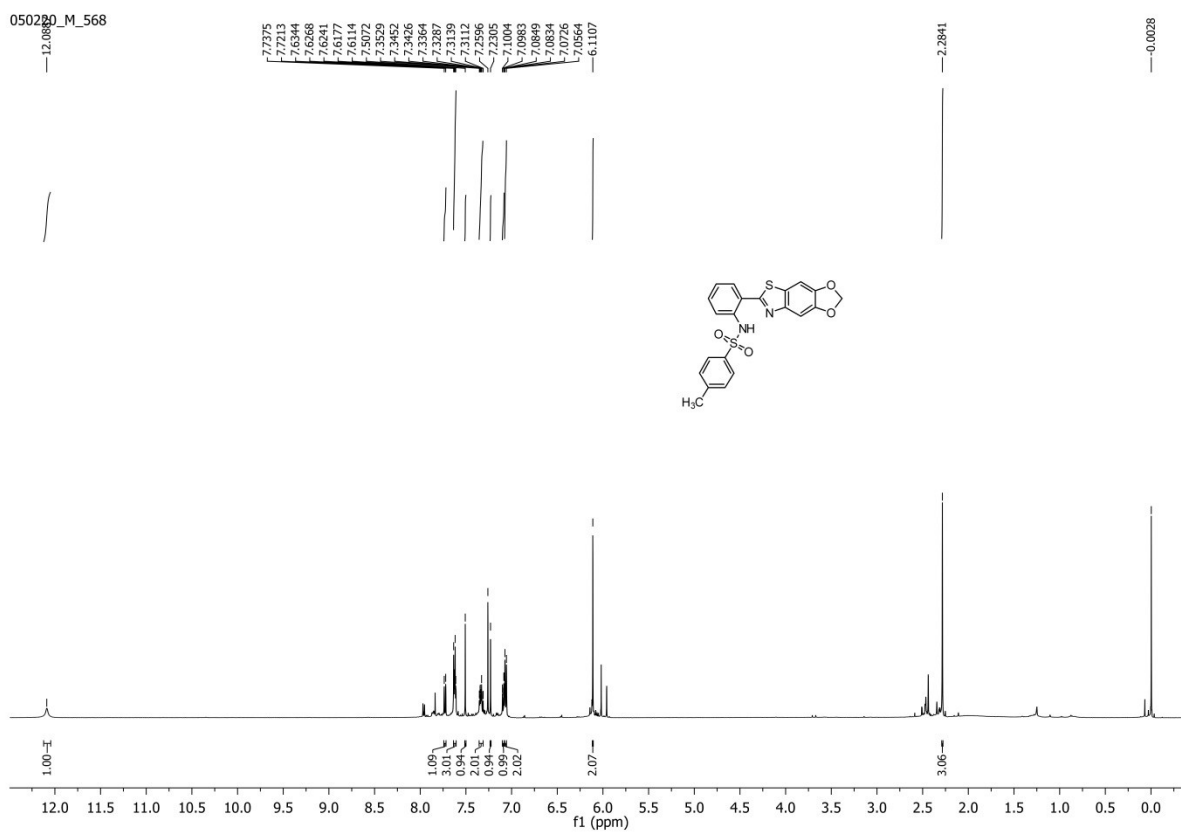

**Figure S63.**  $^1\text{H-NMR}$  spectrum of **10** in  $\text{CDCl}_3$ .

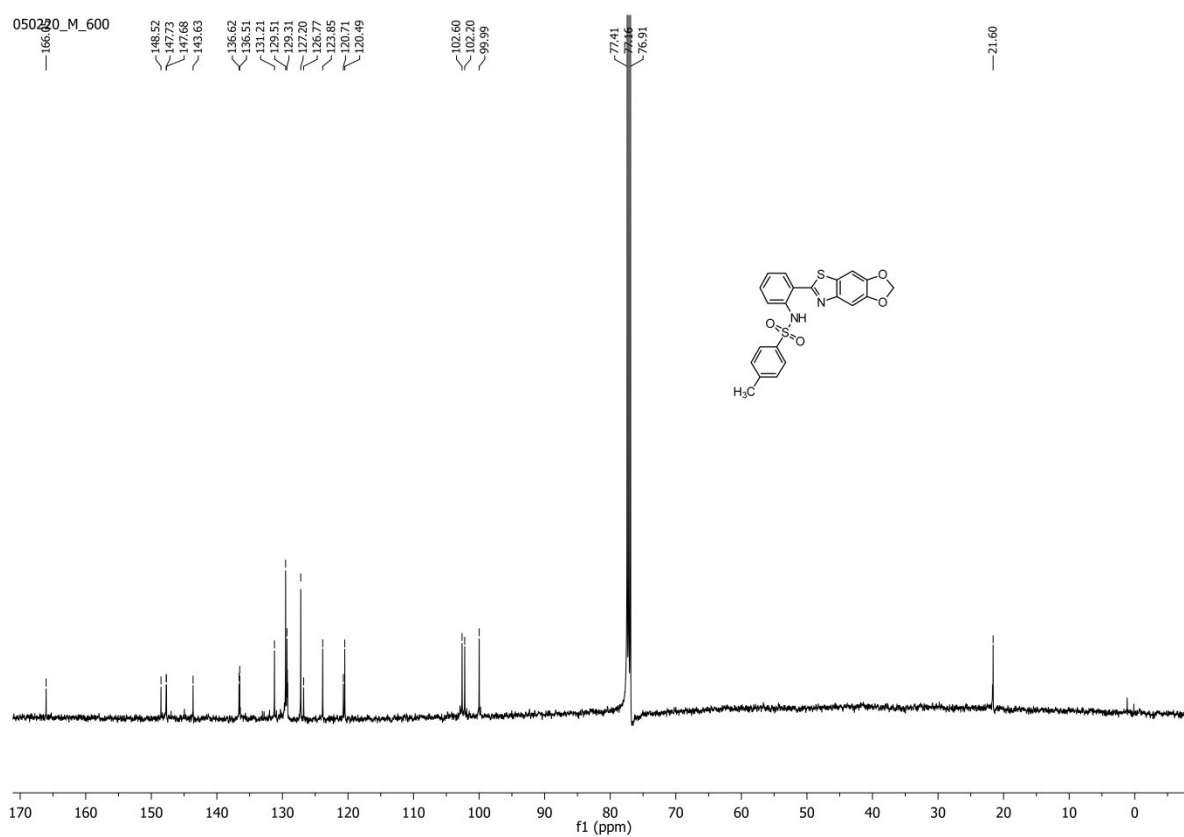

**Figure S64.**  $^{13}\text{C-NMR}$  spectrum of **10** in  $\text{CDCl}_3$ .

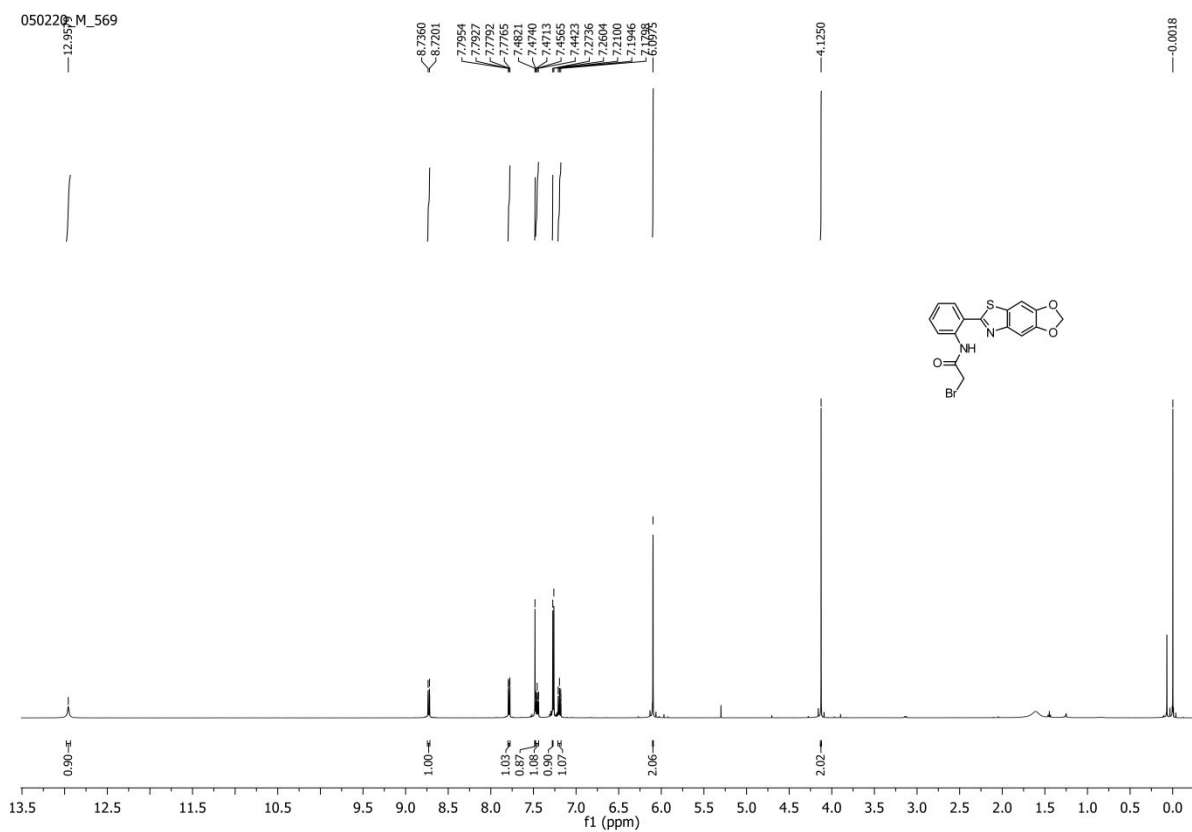

Figure S65.  $^1\text{H-NMR}$  spectrum of **11** in  $\text{CDCl}_3$ .

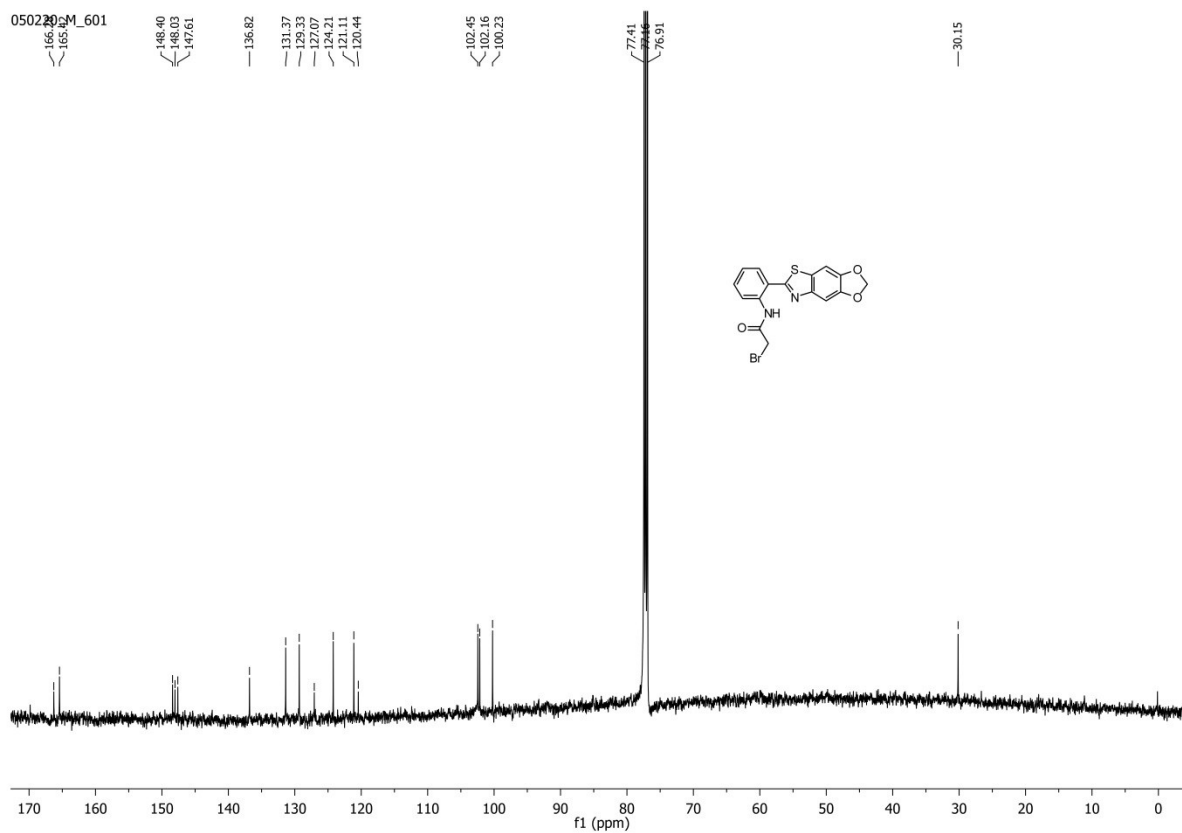

Figure S66.  $^{13}\text{C-NMR}$  spectrum of **11** in  $\text{CDCl}_3$ .



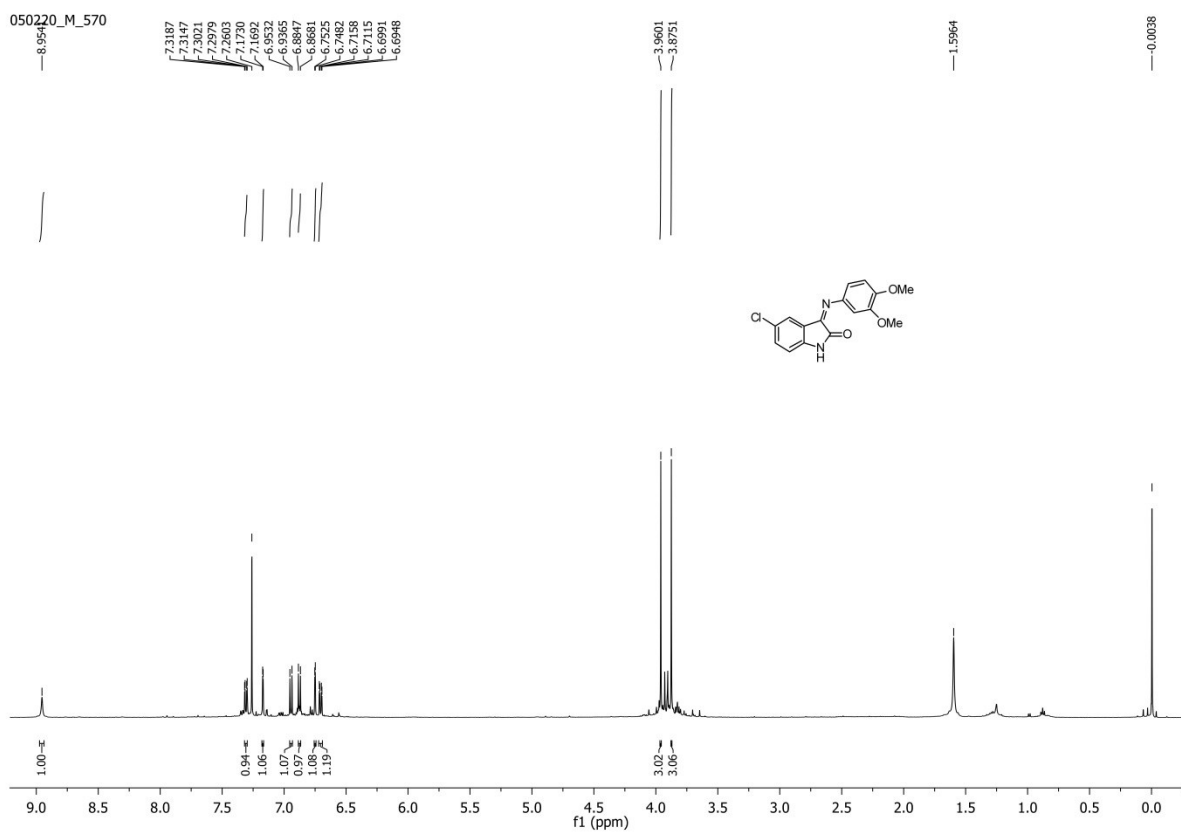

Figure S67.  $^1\text{H-NMR}$  spectrum of **12** in  $\text{CDCl}_3$ .

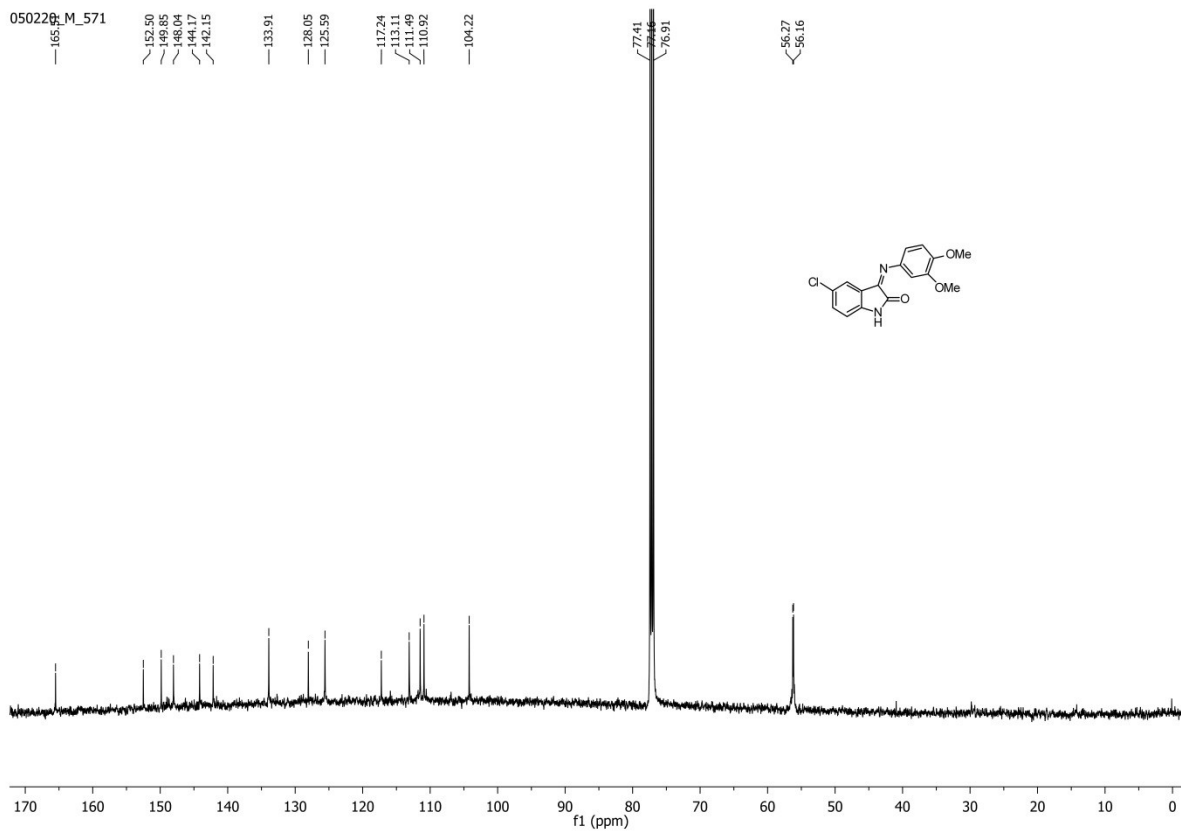

Figure S68.  $^{13}\text{C-NMR}$  spectrum of **12** in  $\text{CDCl}_3$ .
